# Supplementary material for: Three-component acyloxylation of diazo compounds with carboxylic acids and azadienes
Source: Royal Society of Chemistry journal article supplement (doi:10.1039/d2ob02133a), 2022-12-28

## Supporting Information

### Three-Component Acyloxylation of Diazo Compounds with Carboxylic Acids and Azadienes

Meng-Ling Lin, Ting Zheng, Hao Liu, Ying-Xu Wang, Lin Dong\*

*§Key Laboratory of Drug-Targeting and Drug Delivery System of the Education Ministry and Sichuan Province, Sichuan Engineering Laboratory for Plant-Sourced Drug and Sichuan Research Center for Drug Precision Industrial Technology, West China School of Pharmacy, Sichuan University, Chengdu 610041, China*  
[dongl@scu.edu.cn](mailto:dongl@scu.edu.cn)

#### Table of Contents

1. General Information
2. General Procedure for Synthesis of Model Substrates
3. General Procedure for the Model Reaction
4. Scope of Diazo Compounds and Anions Units
5. Control Experiments and Mechanistic Studies
6. NOE Spectra of compound 4e, 5a and 5a'
7. Synthetic application
8. X-ray Data of Compound 4e and Sample Preparation
9. Characterization Data and NMR Spectra

## 1. General Information

NMR data were obtained for  $^1\text{H}$  at 400 MHz or 600 MHz and for  $^{13}\text{C}$  at 100 MHz or 151 MHz. Chemical shifts were reported in ppm from tetramethylsilane with the solvent resonance as the internal standard in  $\text{CDCl}_3$  solution. NMR data are reported as follows: chemical shifts, multiplicity (s: singlet, d: doublet, dd: doublet of doublets, t: triplet, q: quartet, sep: septet, m: multiplet, br: broad signal), coupling constant (Hz), and integration. ESI HRMS was recorded on a Waters SYNAPT G2 and Water XEVO G2 Q-ToF. UV detection was monitored at 254 nm. TLC was performed on glass-backed silica plates. Column chromatography was performed on silica gel (200-300 mesh), eluting with ethyl acetate and petroleum ether, dichloromethane and petroleum ether.

Unless otherwise noted, all starting materials were purchased from commercial sources and used without any further purification. Azadiene **1** compound and its derivatives and diethyl 2-diazomalonate **2** compound and its derivatives were prepared according to literature methods. The cesium salts used in the article were synthesized according to literature methods except cesium acetate. The acids used in the article were purchased commercially.

## 2. General Procedure for Synthesis of Model Substrates

### (1) General procedure for synthesis of azadiene **1a** units

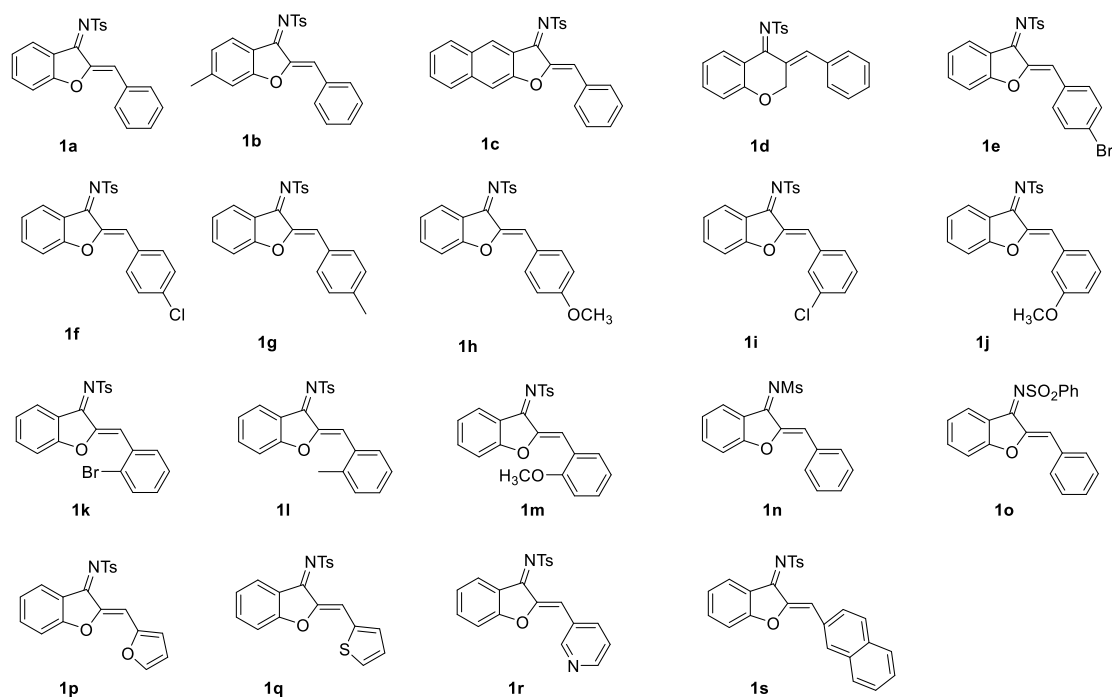

#### Procedure A:

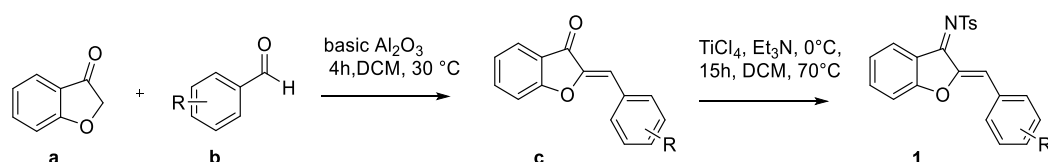

Step 1: To a solution of benzofuran-3(2H)-one (1.34 g, 10 mmol, 1 equiv) in  $\text{CH}_2\text{Cl}_2$  (0.1 M) was successively added  $\text{Al}_2\text{O}_3$  (activated at  $140^\circ\text{C}$  for 3 h, 5.1 g, 25 mmol, 5 equiv) and **b** (12 mmol, 1.2 equiv). After 4 h stirring at rt, the reaction mixture was filtered over diatomite ( $\text{CH}_2\text{Cl}_2$ ) and concentrated under reduced pressure. The resulting crude solid was column chromatography purification

(PE/EA=30:1-20:1) 50%-95% of **c** as a yellow solid. The NMR spectra match with the data reported in the literature<sup>1</sup>.

Step 2: To a solution of **c** (5.0 mmol, 1 equiv) and TsNH<sub>2</sub> (1.3 g, 7.5 mmol, 1.5 equiv) in toluene or CH<sub>2</sub>Cl<sub>2</sub> (0.1M) was added NEt<sub>3</sub> (1.2 g, 12 mmol, 2.4 equiv). The reaction was cooled to 0 °C and TiCl<sub>4</sub> (0.66 mL, 6 mmol, 1.2 equiv) was added dropwise. After 16 h stirring under reflux, the mixture was quenched with H<sub>2</sub>O and extracted with CH<sub>2</sub>Cl<sub>2</sub>. The combined organic layers were washed with brine, dried over Na<sub>2</sub>SO<sub>4</sub> and concentrated under reduced pressure. The residue was purified by flash chromatography on silica gel (Petroleum ether/ethyl acetate = 30:1-10:1) then recrystallized to afford 40%-88% of azadiene **1** as a yellow solid. The NMR spectra match with the data reported in the literature<sup>2</sup>.

**1a,1d-1s** were prepared according to the procedure A.

Procedure B:

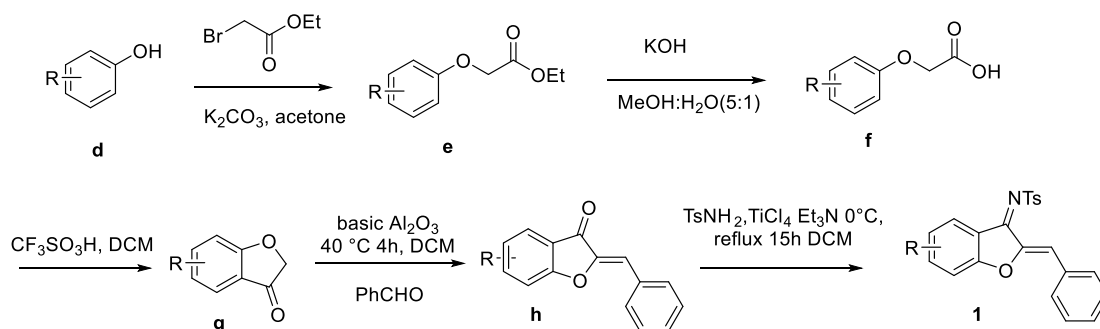

Step 1: To a 10 mL dry round-bottom flask equipped with a stir bar were added **d** (10 mmol) and dried acetone (30 mL). After the solid was completely dissolved, anhydrous K<sub>2</sub>CO<sub>3</sub> (30 mmol) was added. Then ethyl bromoacetate (12 mmol) was dropwise added into the reaction mixture and the resulting mixture was stirred at reflux for 4 h. After the reaction was completed by TLC monitoring, the reaction mixture was cooled to room temperature, filtered and concentrated in-vacuo to obtain the desired ester **b**. The crude product was used for the next step without further purification.

Step 2: A solution of compound **e** and potassium hydroxide (30 mmol) in methanol (25 mL) and water (5 mL) was stirred at room temperature for 5 h. After the reaction was completed by TLC monitoring, the mixture was adjusted to acidic (pH = 2-3) with 35% HCl aq. Then the reaction mixture was diluted with H<sub>2</sub>O (30 mL), followed by extraction with ethyl acetate (25 mL × 3). The extracted organic phase was dried over anhydrous Na<sub>2</sub>SO<sub>4</sub>, filtered and concentrated in vacuo to obtain the crude acid, which was further recrystallized in ethanol to provide pure acid **f**.

Step 3: In a dry round-bottom flask, acid **f** (5 mol) was dissolved with CH<sub>2</sub>Cl<sub>2</sub> (25 mL). The mixture was cooled to 0°C and TfOH (25 mmol) was slowly added into the reaction. After stirring at 0°C for 15 min, the reaction was warmed to room temperature. After the reaction was completed by TLC monitoring, and then quenched with ice water. The final mixture was adjusted with 35% Na<sub>2</sub>CO<sub>3</sub> solution to the neutral (pH = 7-8) and extracted with dichloromethane (50 mL × 3). The organic layer was dried over Na<sub>2</sub>SO<sub>4</sub> and evaporated under vacuum. The residue was purified by silica gel column chromatography (petroleum ether/ ethyl acetate = 10:1) to obtain the desired ketone **g**.

Step 4-5: Same as above procedure A step 1-2.

**1b-1c** were also prepared according to the procedure B and the literature procedures<sup>3,4</sup>.

(2) General procedure for synthesis of Diazo compounds **2a** units

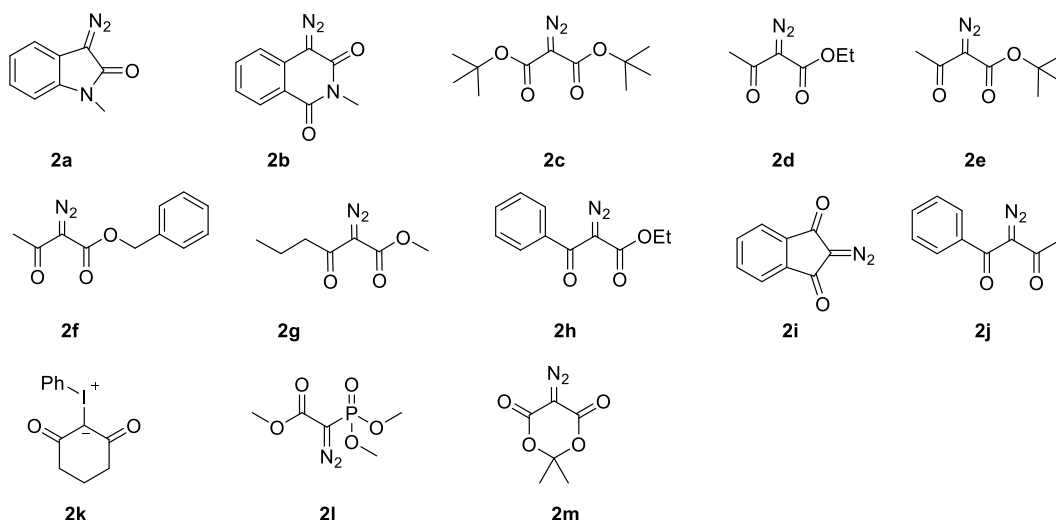

Procedure A:

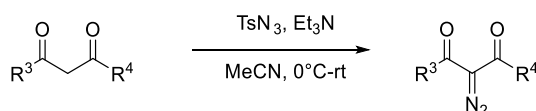

To a round bottom flask charged with ketoester (10 mmol) and  $\text{TsN}_3$  (13 mmol) in acetonitrile (25 mL) was added triethylamine (4.2 mL, 13 mmol) dropwise at 0 °C. Upon stirring at room temperature for 4h-14 h, the reaction mixture was concentrated under reduced pressure. After the reaction was completed by TLC monitoring, The reaction mixture was filtered through a pad of Celite and washed with EtOAc (10 mL x 3). The solvent was evaporated under reduce pressure and the residue was purified by flash column chromatography using EtOAc/petroleum ether as eluent to furnish the pure diazo compound.

**2c-2j, 2l-2m** were prepared according to the procedure A<sup>5,6</sup>.

Procedure B:

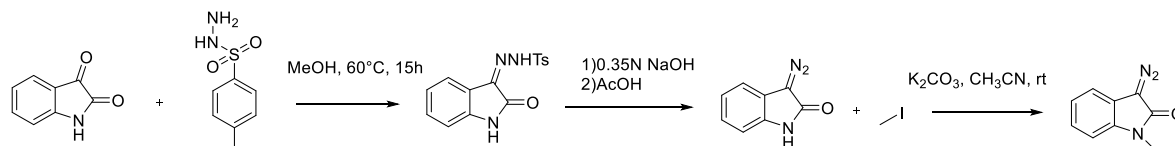

Step 1: In a 200 mL round bottom flask,  $\text{TsNHNH}_2$  (2.05 g, 11 mmol) in methanol (60 mL) were added and kept at 60 °C followed by the corresponding isatin (10 mmol) was added to a hot solution. The reaction mixture was refluxed for 10 h (TLC monitoring), followed by filtration of the crude reaction mixture gave the p-tosylhydrazone derivative as yellow solid (95% yield). The obtained p-tosylhydrazone derivative was used for the next step without any further purification.

Step 2: In a 100 mL round bottom flask, p-tosylhydrazone (6 mmol, 1 equiv) was added followed by 45 mL of 0.35M aqueous solution of NaOH (0.617 g, 15.42 mmol, 2.57 equiv) was added. The reaction mixture was stirred for 3 h at 50 °C, then allowed to cool to room temperature. The reaction mixture was neutralized by addition of ice and glacial acetic acid (10 mL) and extracted in dichloromethane. The organic layer was dried over  $\text{Na}_2\text{SO}_4$ , and concentrated under reduced pressure to afford the diazo compound as orange solid (90% yield), which was employed in the next step without any further purification.

Step 3: A mixture of diazo compound (5 mmol),  $\text{K}_2\text{CO}_3$  (1.38 g, 10 mmol) and alkyl halide (10 mmol) in  $\text{CH}_3\text{CN}$  (10 mL) was stirred at room temperature for 15 h. Then, the reaction mixture was diluted with  $\text{CH}_2\text{Cl}_2$  and washed with water (60 mL x 3). The organic phase was dried by  $\text{Na}_2\text{SO}_4$  and the solvent was

removed under reduced pressure. The resulting residue was purified by flash chromatography to give N-alkylated diazo compound as an orange solid (71 % yield).

**2a** were prepared according to the procedure B.<sup>7</sup>

Procedure C.:

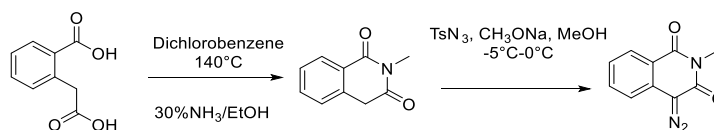

Step 1: In a dry round-bottom flask, homophthalic acid (10.0 mmol, 1.8 g) and methylamine (5 mL of 40% solution in water). The solution of homophthalic acid in aqueous methylamine was evaporated at atmospheric pressure (bath temperature 180 °C) and then dried in vacuo. The residue was heated at reflux in 1,2-dichlorobenzene (10 mL) for 6 hours. The target compound was obtained after removal of the solvent under reduced pressure and recrystallization. Yield 1.1g (66%).

Step 2: The product obtained in the previous step (1 mmol, 1 equiv) and TsN<sub>3</sub> (2 mmol, 2 equiv) in 4 ml of methanol were added to -5 °C with sodium methoxide (2 mmol, 2 equiv). Then, react at 0 °C for 4 h. After the reaction is completed, the reaction was quenched by adding water, extracted with ethyl acetate, dried over anhydrous sodium sulfate, and concentrated in vacuo. Then the residue was purified by flash column chromatography using EtOAc/petroleum ether as eluent to furnish the pure diazo compound. Yield 110mg (54%), pale yellow crystals.

**2b** were prepared according to the procedure C.<sup>8</sup>

Procedure D.:

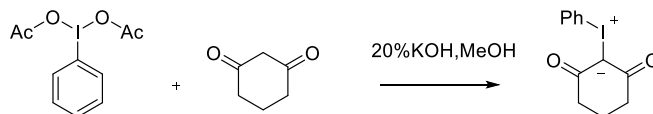

In a 100 mL round bottom flask equipped with a magnetic stirrer, add a solution of 1,3-cyclohexanedione (1.0 equiv) in 30 mL methanol, 20 mL 10% KOH aq at room temperature, and then diacetoxy iodobenzene (1.2 equiv) in 40 mL of methanol. The reaction mixture was stirred at room temperature for 2 hours and then quenched with ice cold water. The resulting white precipitate was filtered, and the mother liquor was extracted with dichloromethane, then washed three times with water, dried over anhydrous Na<sub>2</sub>SO<sub>4</sub>, filtered and concentrated under reduced pressure. The resulting white solid was recrystallized from DCM/hexane to give the compound as a white solid.

**2k** were prepared according to the procedure D.<sup>9</sup>

## References:

- [1] Liu, C.; Zhang, Z.; Zhang, J.; Liu, X.; Xie, M. Regioselective Synthesis of Aurone Derivatives via PBu<sub>3</sub>-Catalyzed Cyclization of 2-Alkynoylphenols. *Chin. J. Chem.* **2014**, 32, 1233–1237.
- [2] Fang, Q. Y.; Yi, M. H.; Wu, X. X.; and Zhao, L. M. Regio- and Diastereoselective Spirocyclopropanation of Benzofuran-Derived Azadienes through 1,4-Addition-Induced Dearomatization Reaction under Mild Conditions. *Org. Lett.* **2020**, 22, 5266–5270.
- [3] Y. Su et al. Regioselective synthesis of spiro naphthofuranone-pyrazoline via a [3+2] cycloaddition of benzoaurones with nitrile imines. *Tetrahedron* **76** (2020) 131355.
- [4] Qi, J. F.; Tang, H. B.; Chen, C. W.; Cui, S. L. and Xu, G. Reductive coupling of alkenes with unsaturated imines via a radical pathway. *Org. Chem. Front.*, **2019**, 6, 2760.
- [5] Tan, W. W.; Naohiko Yoshikai. Copper-catalyzed condensation of imines and  $\alpha$ -diazo- $\beta$ -dicarbonyl

compounds: modular and regiocontrolled synthesis of multisubstituted pyrroles. *Chem. Sci.*, **2015**, 6, 6448.

[6] Ravindra S. P.; Chepuri V. R. et al. Fluoride-Mediated Dephosphonylation of  $\alpha$ -Diazo- $\beta$ -carbonyl Phosphonates. *Org. Lett.* **2017**, 19, 372–375.

[7] Reddy, A. C. S.; Reddy, P. M.; Anbarasan, P. Diastereoselective Palladium Catalyzed Carbenylative Amination of ortho-Vinylanilines with 3-Diazoindolin-2-ones. *Adv. Synth. Catal.* **2020**, 362, 801 – 806.

[8] Kantin, G.; Darin, D.; Krasavin, M. Rh<sup>II</sup>-Catalyzed Cycloaddition of  $\alpha$ -Diazo Homophthalimides and Nitriles Delivers Oxazolo[5,4-c]isoquinolin-5(4H)-one Scaffold. *Eur. J. Org. Chem.* **2018**, 4857–4859.

[9] Mayakrishnan, S.; Tamizmani, M.; Maheswari, N. U. Harnessing hypervalent iodonium ylides as carbene precursors: C–H activation of N-methoxybenzamides with a Rh(III)-catalyst. *Chem. Commun.*, **2020**, 56, 15462.

### 3. General Procedure for the Model Reaction

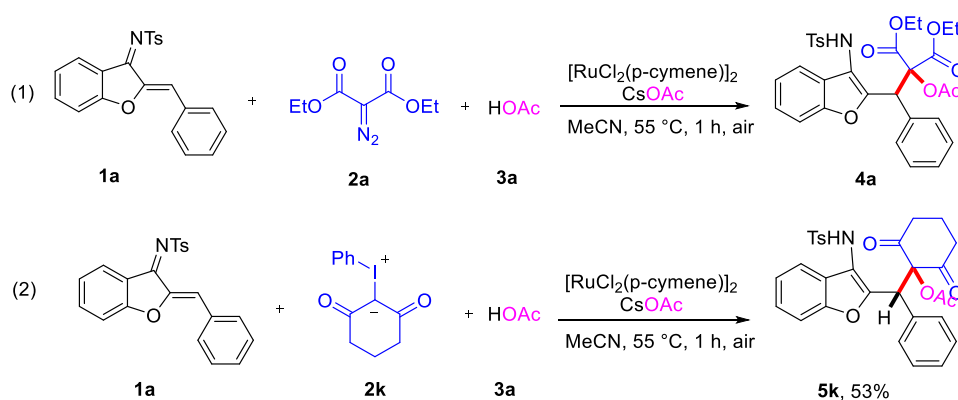

**The eq 1:** To a flame dried screw-cap tube equipped with magnetic stir bar were introduced azadiene **1a** (37.6 mg, 0.1 mmol), and diethyl 2-diazomalonate **2a** (46.5 mg, 2.5 equiv),  $[\text{RuCl}_2(\text{p-cymene})]_2$  (3 mg, 5 mol %), CsOAc (38.4 mg, 2 equiv), AcOH (14.3  $\mu\text{L}$ , 2.5 equiv), MeCN (1 mL). The reaction mixture was stirred in preheated oil bath at 55  $^\circ\text{C}$  under air atmosphere for 1 hour. After completion, the reaction mixture was purified by flash chromatography eluting with ethyl acetate and petroleum ether (1:5) to give the product **4a** as a white solid or yellowish clear liquid (52.8 mg, 89%).

**The eq 2:** Same as above steps. **2k** (3 equiv), after the completion of the reaction, diatomaceous earth filter, vacuum dry coarse product in acetonitrile recrystallization get **5k** in 53% yield.

### 4. Scope of Diazo Compounds and Anions Units

#### (1) Scheme S3 Scope of Diazo Compounds

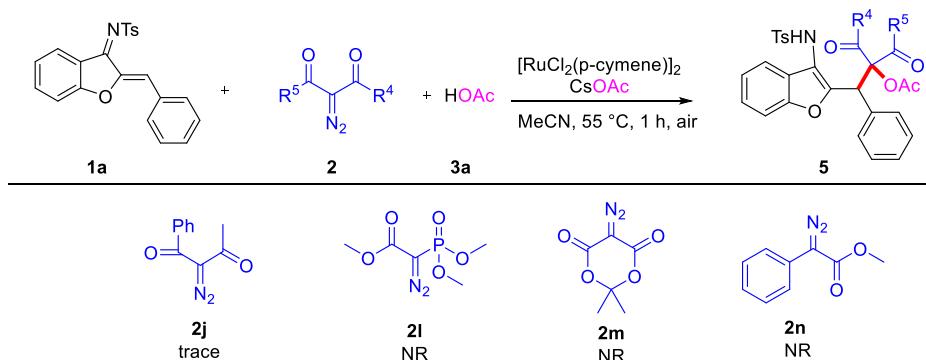

When the substrate **2j** reacts with **1a**, the reaction system is chaotic and the product is less. However, lowering the temperature did not improve the yield, probably because the reactivity of **2j** is too low.

Under standard conditions, **2m** and **1a** failed to react, so we tried to replace **2m** with **2k**. Disappointingly, **2l** and **2n** also failed to react under the optimal reaction conditions.

## (2) Scheme S4 Scope of Anions Units

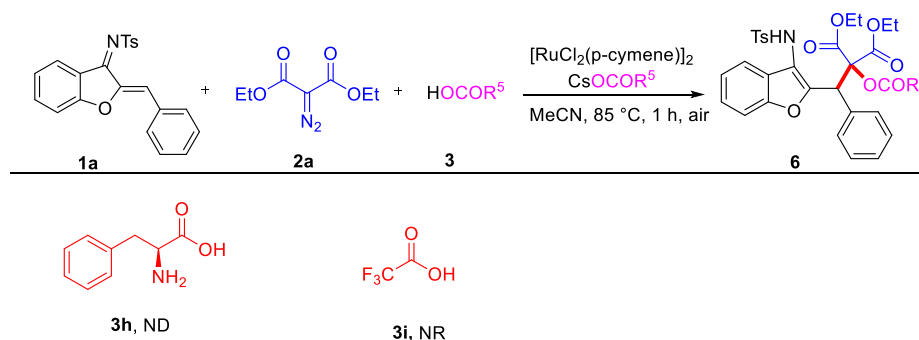

Under standard conditions, during the reaction between **3h** and **1a**, the product **6h** was not found. And the reaction material is destroyed. In addition, under standard conditions, during the reaction of **3i** and **1a**, by TLC found that **1a** and **3i** no reaction and were not destroyed.

## 5. Control Experiments and Mechanistic Studies

### (1) The model reaction in the absence of catalyst

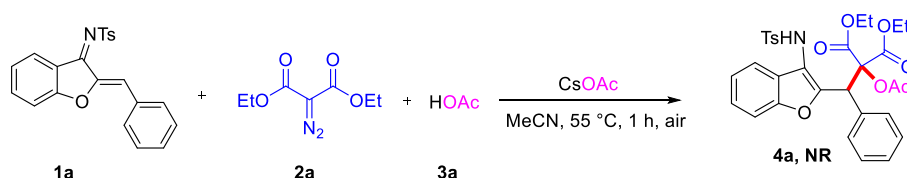

To a flame dried screw-cap tube equipped with magnetic stir bar were introduced azadiene **1a** (37.6 mg, 0.1 mmol), and diethyl 2-diazomalonate **2a** (46.5 mg, 2.5 equiv),  $\text{CsOAc}$  (38.4 mg, 2 equiv),  $\text{AcOH}$  (14.3  $\mu\text{L}$ , 2.5 equiv), MeCN (1 mL). The reaction mixture was stirred in preheated oil bath at 55 °C under air atmosphere for 1 hour. No product formation was observed by TLC.

### (2) Detection of intermediate **I** and **2a'** by LCMS data

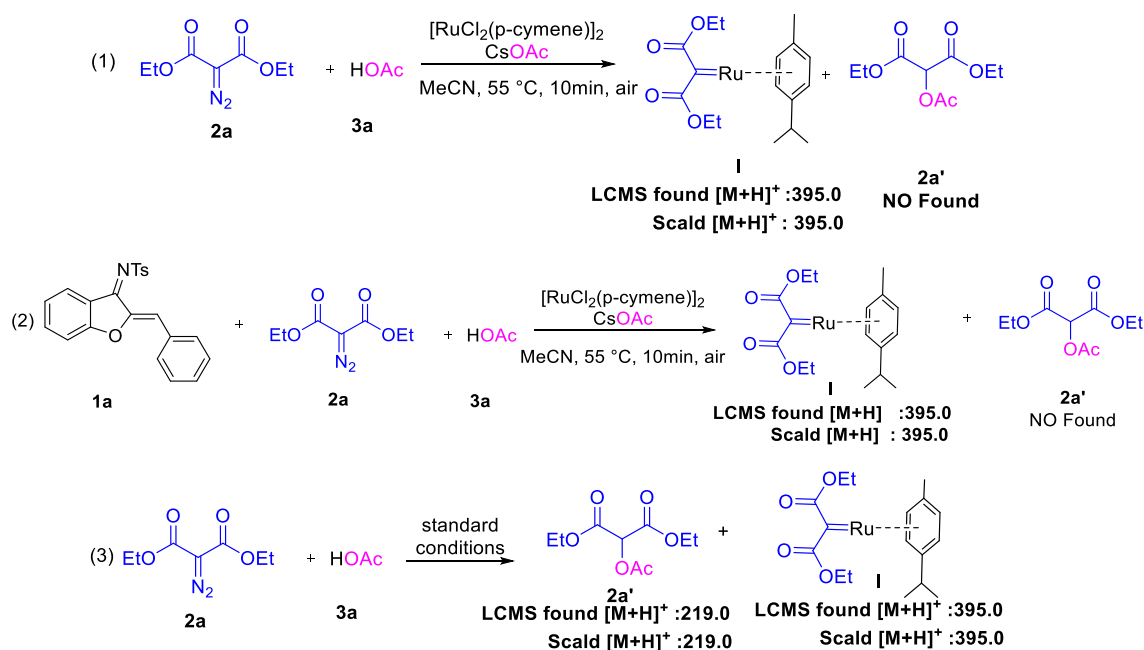

**The eq 1:** To a flame dried screw-cap tube equipped with magnetic stir bar were introduced diethyl 2-diazomalonate **2a** (23.3 mg, 2.5 equiv), [RuCl<sub>2</sub>(p-cymene)]<sub>2</sub> (1.5 mg, 5 mol %), CsOAc (19.2 mg, 2 equiv), AcOH (7.3 μL, 2.5 equiv), MeCN (0.5 mL). The reaction mixture was stirred in preheated oil bath at 55 °C under air atmosphere for 10min. After completion, the reaction mixture was then tested by LCMS. Different ionic forms of intermediate **I** was detected by LCMS and **2a'** was not found.

**The eq 2:** As above. **1a** (18.8 mg, 0.05 mmol), The reaction mixture was stirred in preheated oil bath at 55 °C under air atmosphere for 0.5h. After completion, the reaction mixture was then tested by LCMS. Different ionic forms of intermediate **I** was detected by LCMS.

**The eq 3:** As above. The reaction mixture was stirred in preheated oil bath at 55 °C under air atmosphere for 1h. After completion, the reaction mixture was then tested by LCMS. Different ionic forms of intermediate **I** was detected by LCMS and **2a'** was found.

**eq 1 LCMS:**

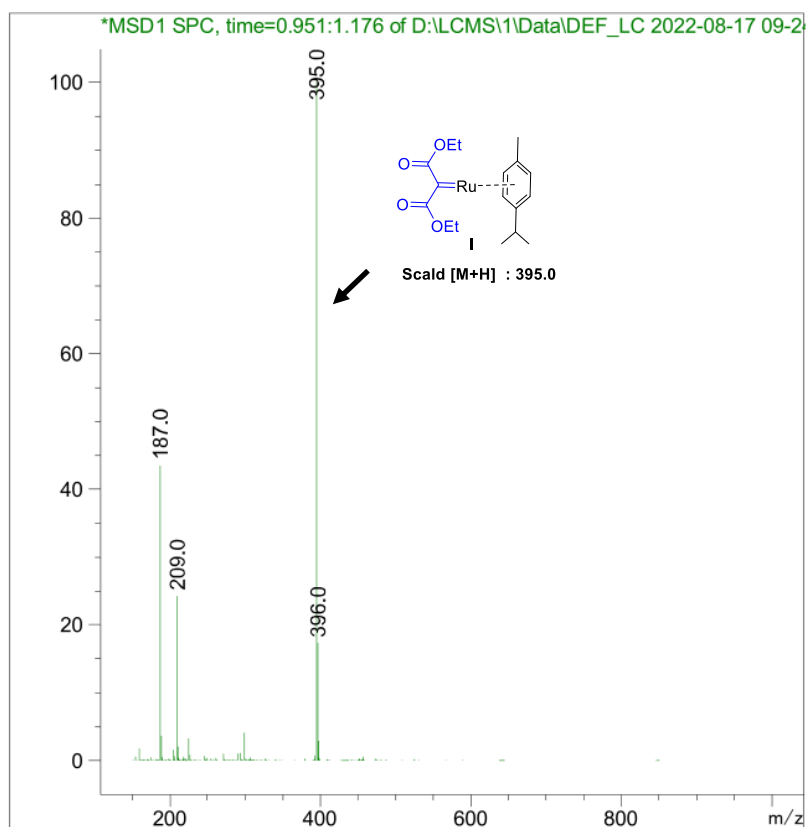

**eq 2 LCMS:**

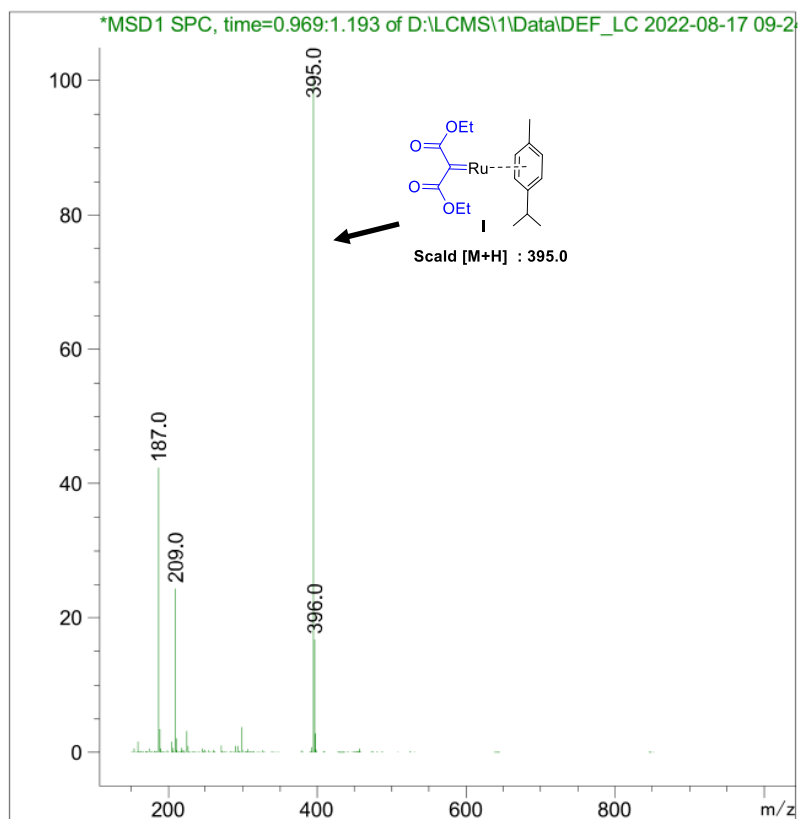

eq 3 LCMS:

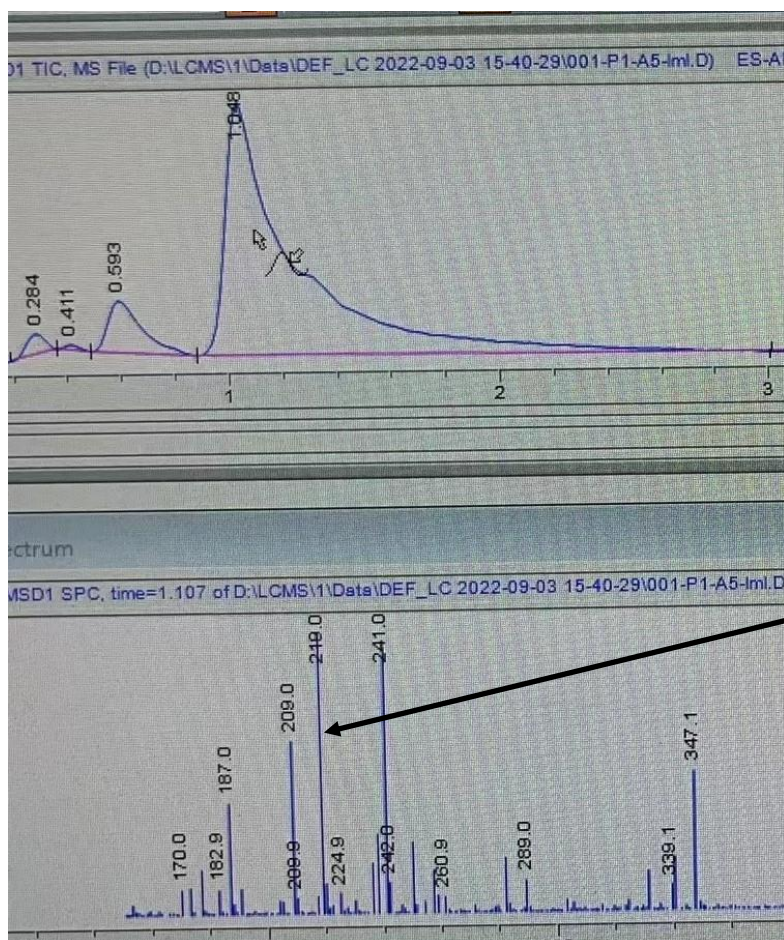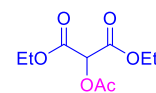

2a'

LCMS found [M+H]<sup>+</sup> : 219.0  
Scald [M+H]<sup>+</sup> : 219.0

### (3) Detection of intermediate **2I** and **2e'** by LCMS data

**The eq 4 :** As above **the eq 1**, ethyl 2-diazo-3-oxobutanoate **2e** (23.3 mg, 2.5 equiv), AcOH (11.6  $\mu$ L, 4 equiv). The reaction mixture was stirred in preheated oil bath at 55°C under air atmosphere for 1h. After completion, the reaction mixture then tested by LCMS. Different ionic forms of intermediate **2I** and **2e'** were detected by LCMS.

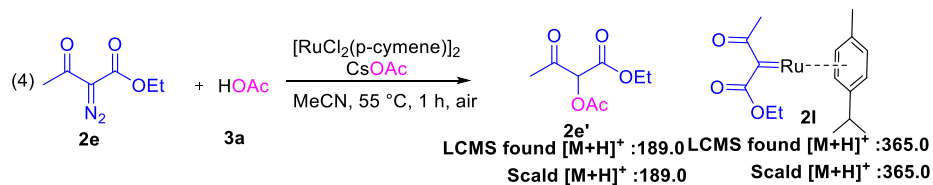

eq 4 LCMS:

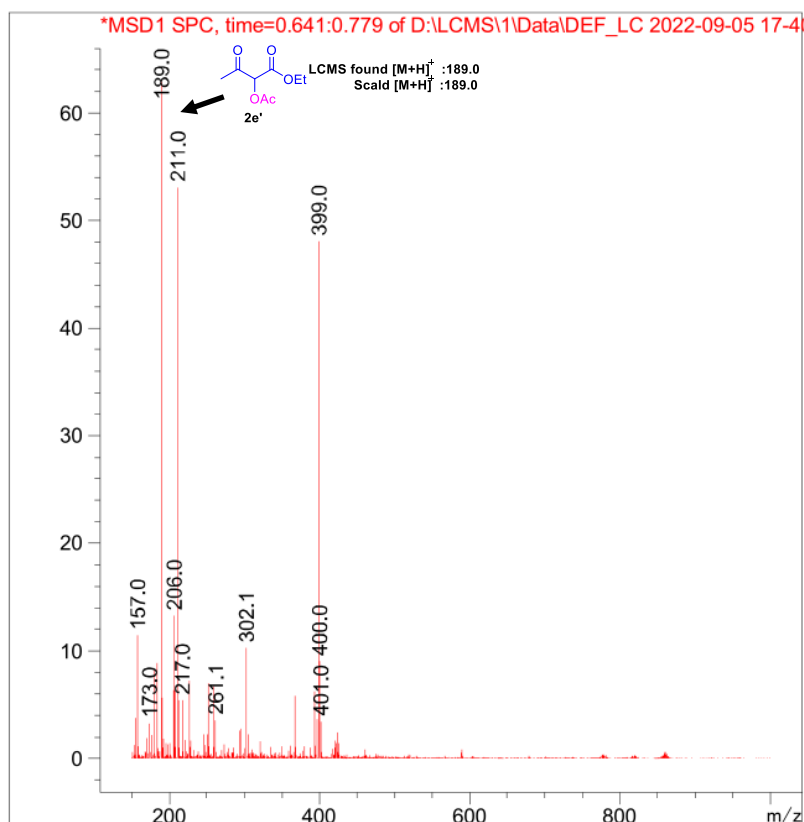

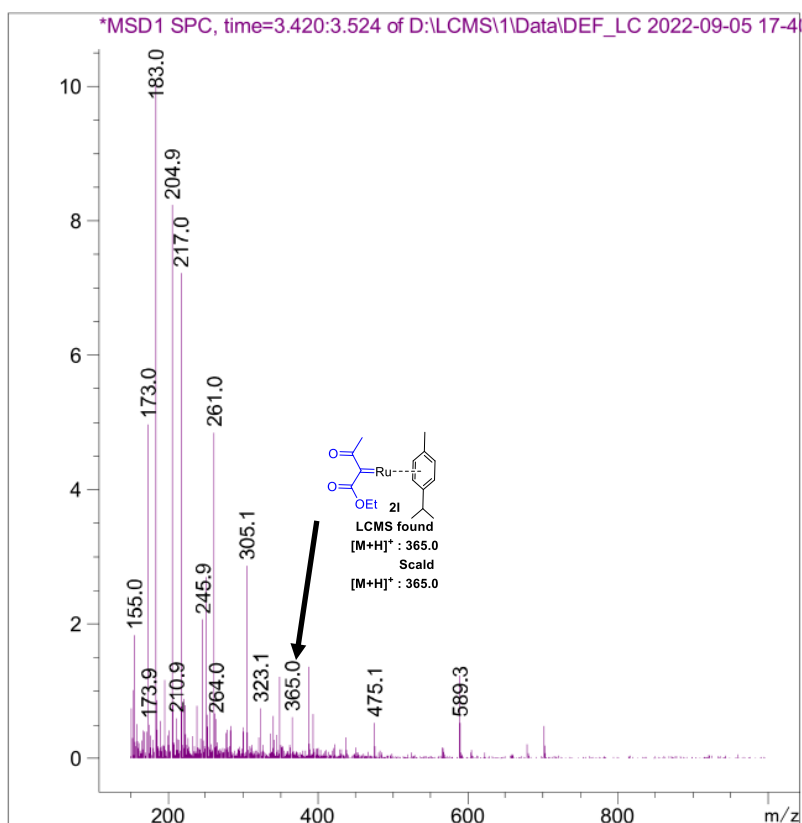

#### (4) Styrene capture experiment

**The eq 5 :** As above **the eq 1**, **2a** (0.125mmol), styrene **2x** (13 mg, 1 equiv), AcOH (7.3μL, 1 equiv). The reaction mixture was stirred in preheated oil bath at 55°C under air atmosphere for 1 h. After completion, the reaction mixture fast through diatomite, low temperature vacuum spin drying then tested by crude NMR.

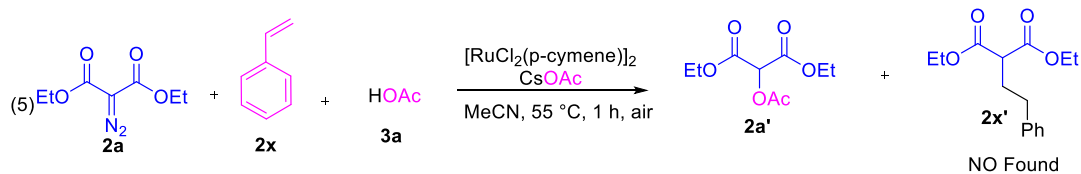

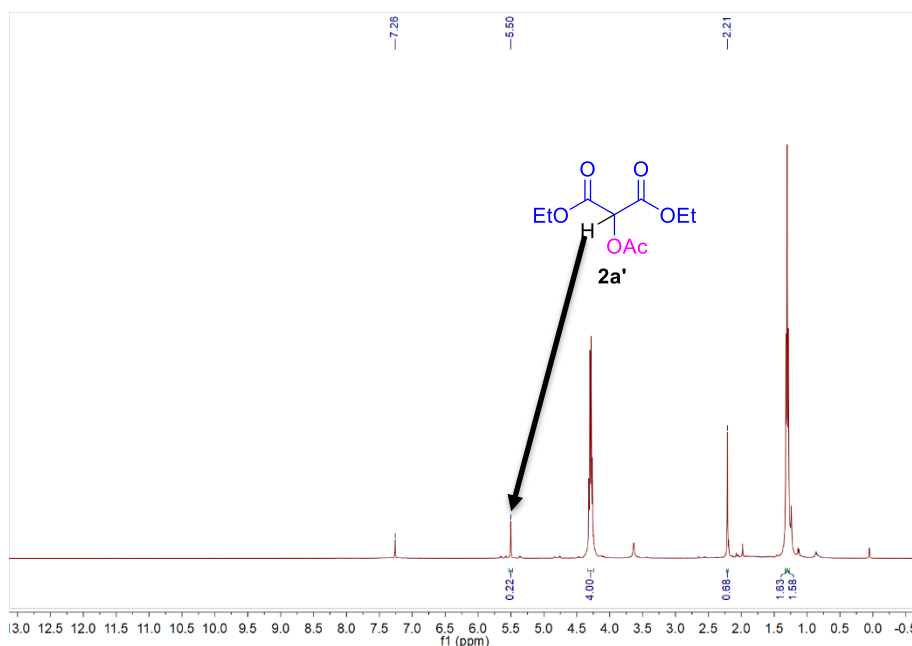

### (5) Intermediate **2a'** and **2e'** transformation

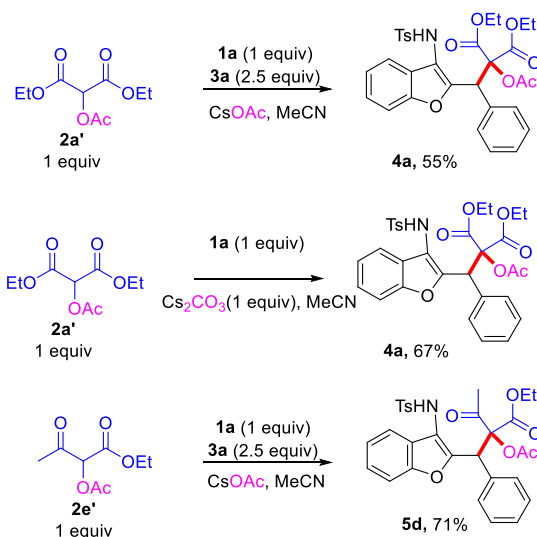

To a flame dried screw-cap tube equipped with magnetic stir bar were introduced diethyl 2-diazomalonate **2a'** (9.5 mg, 1 equiv), **1a** (18.8 mg, 1 equiv), CsOAc (19.2 mg, 2 equiv), AcOH (7.3  $\mu$ L, 2.5 equiv), MeCN (0.5 mL). The reaction mixture was stirred in preheated oil bath at 55 °C under air atmosphere for 1 h. Monitored by TLC, after the completion of the reaction, spin-dried silica gel column chromatography to obtain the product **4a** (16.3 mg, 55%).

Diethyl 2-diazomalonate **2a'** (9.5 mg, 1 equiv), Cs<sub>2</sub>CO<sub>3</sub> (1 equiv), without **3a**, the reaction also gave the product **4a** (19.8 mg, 67%).

### (6) Radical trapping experiment

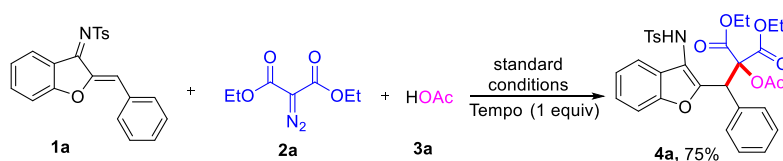

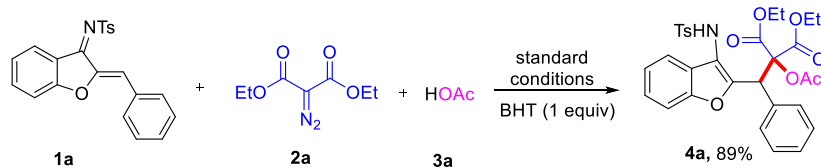

**The TEMPO:** To a flame dried screw-cap tube equipped with magnetic stir bar were introduced azadiene **1a** (18.8 mg, 0.05 mmol), and diethyl 2-diazomalonate **2a** (23.3 mg, 2.5 equiv),  $[\text{RuCl}_2(\text{p-cymene})]_2$  (1.5 mg, 5 mol %),  $\text{CsOAc}$  (19.2 mg, 2 equiv),  $\text{AcOH}$  (7.3  $\mu\text{L}$ , 2.5 equiv), TEMPO (7.8 mg, 1 equiv), MeCN (0.5 mL). The reaction mixture was stirred in preheated oil bath at 55 °C under air atmosphere for 1 hour. After completion, the reaction mixture was purified by flash chromatography eluting with ethyl acetate and petroleum ether (1:5) to give the product **4a** (75%).

**The BHT:** As above, BHT (1 equiv). The product **4a** (89%).

### (7) Explore the source of acetate groups

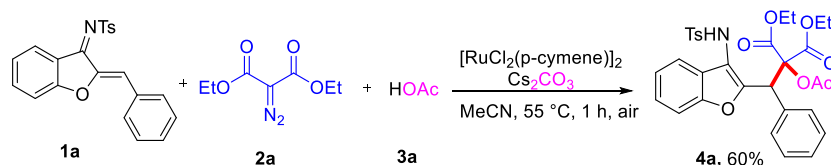

To a flame dried screw-cap tube equipped with magnetic stir bar were introduced azadiene **1a** (18.8 mg, 0.05 mmol), and diethyl 2-diazomalonate **2a** (23.3 mg, 2.5 equiv),  $[\text{RuCl}_2(\text{p-cymene})]_2$  (1.5 mg, 5 mol %),  $\text{Cs}_2\text{CO}_3$  (32.5 mg, 2 equiv),  $\text{AcOH}$  (7.3  $\mu\text{L}$ , 2.5 equiv), MeCN (0.5 mL). The reaction mixture was stirred in preheated oil bath at 55 °C under air atmosphere for 1 hour. After completion, the reaction mixture was purified by flash chromatography eluting with ethyl acetate and petroleum ether (1:5) to give the product **4a** (60%).

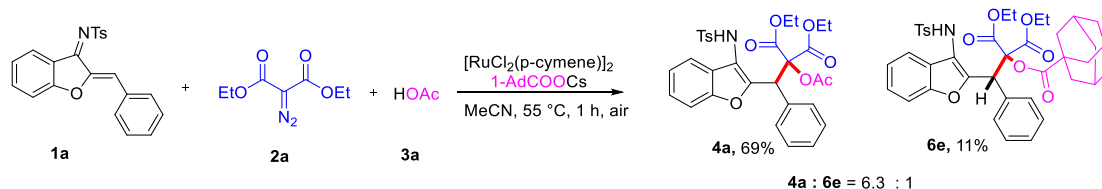

As above, 1-AdCOOCs (31.2 mg, 2 equiv). After completion, the reaction mixture was purified by flash chromatography eluting with ethyl acetate and petroleum ether (1:5) to give the product **4a** (69%) and **6e** (11%). It can be seen from the crude NMR **4a**:**6e** = 6.3 : 1.

**the crude NMR **4a**:**6e** = 6.3 : 1:**

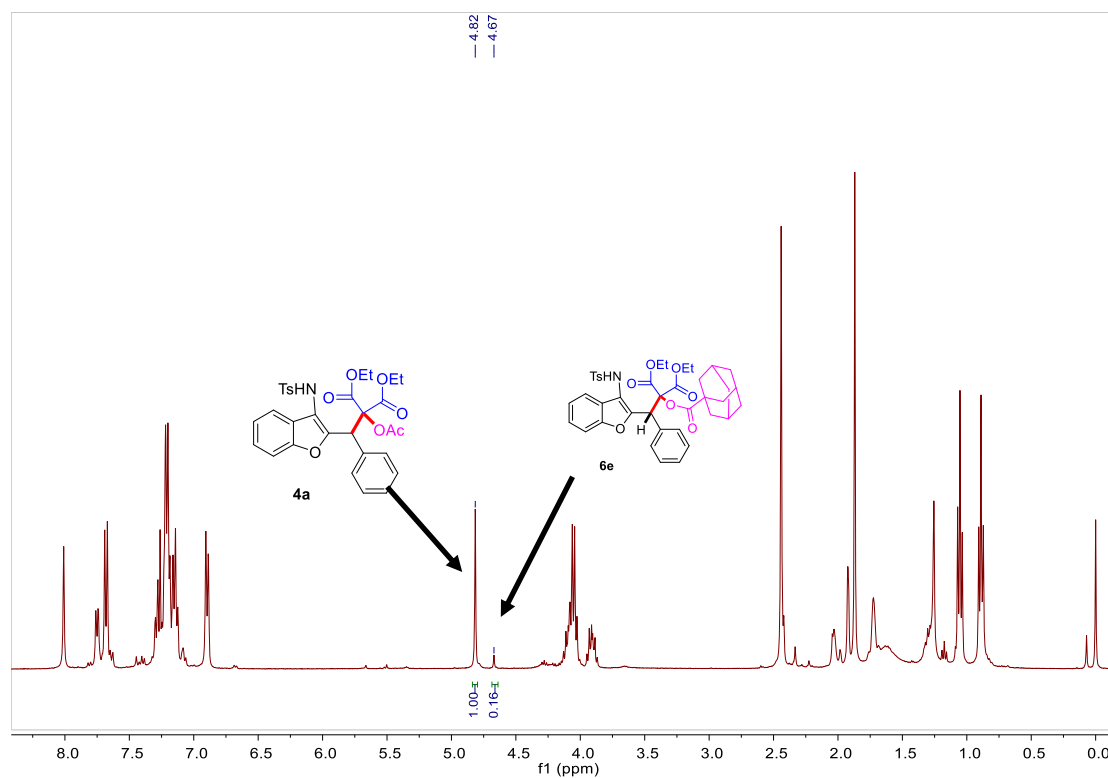

As above, CsOR (31.2 mg, 2 equiv). After completion, the reaction mixture was purified by flash chromatography eluting with ethyl acetate and petroleum ether (1:5) to give the product **4a** (33%) and **6b** (46%). It can be seen from the crude NMR **4a:6b** = 1 : 1.4.

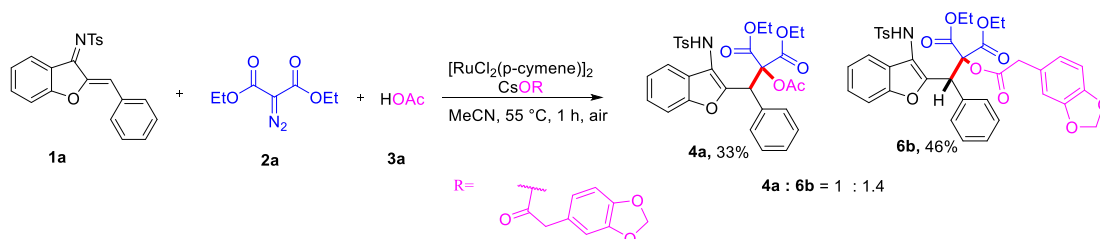

**the crude NMR 4a:6b = 1 : 1.4:**

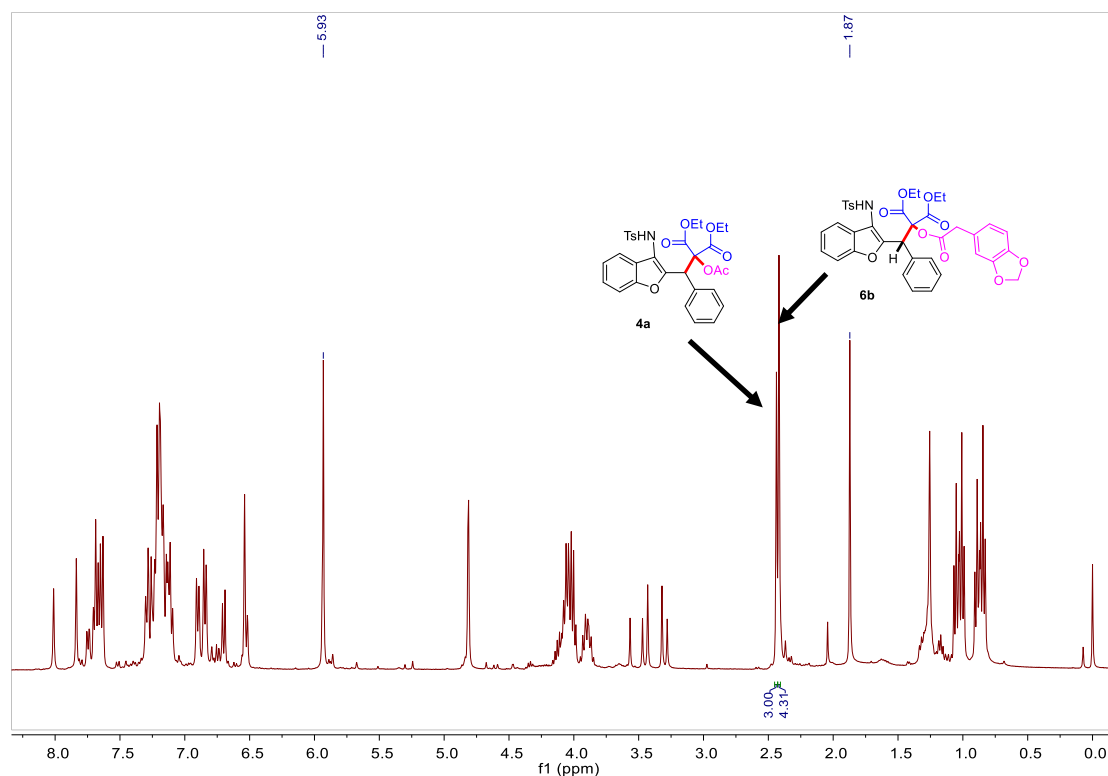

#### (8) 4e and 4g competition experiment

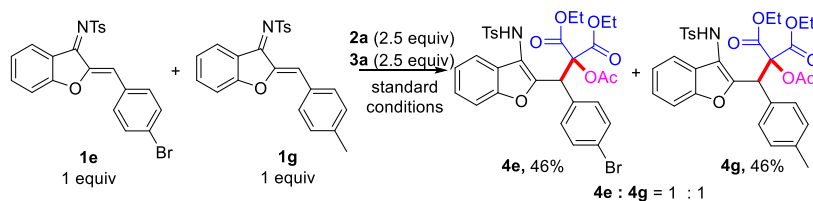

To a flame dried screw-cap tube equipped with magnetic stir bar were introduced azadiene **1e** (45.3 mg, 0.1 mmol), **1g** (38.9 mg, 0.1 mmol) and diethyl 2-diazomalonate **2a** (46.5 mg, 2.5 equiv), [RuCl<sub>2</sub>(p-cymene)]<sub>2</sub> (3 mg, 5 mol %), CsOAc (38.4 mg, 2 equiv), AcOH (14.3 μL, 2.5 equiv), MeCN (1 mL). The reaction mixture was stirred in preheated oil bath at 55 °C under air atmosphere for 1 hour. After completion, the reaction mixture was purified by flash chromatography eluting with ethyl acetate and petroleum ether (1:5) to give crude product **4e** and **4g** by crude NMR got **4e:4g** = 1:1.

**Product 4e and 4g mixed crude NMR:**

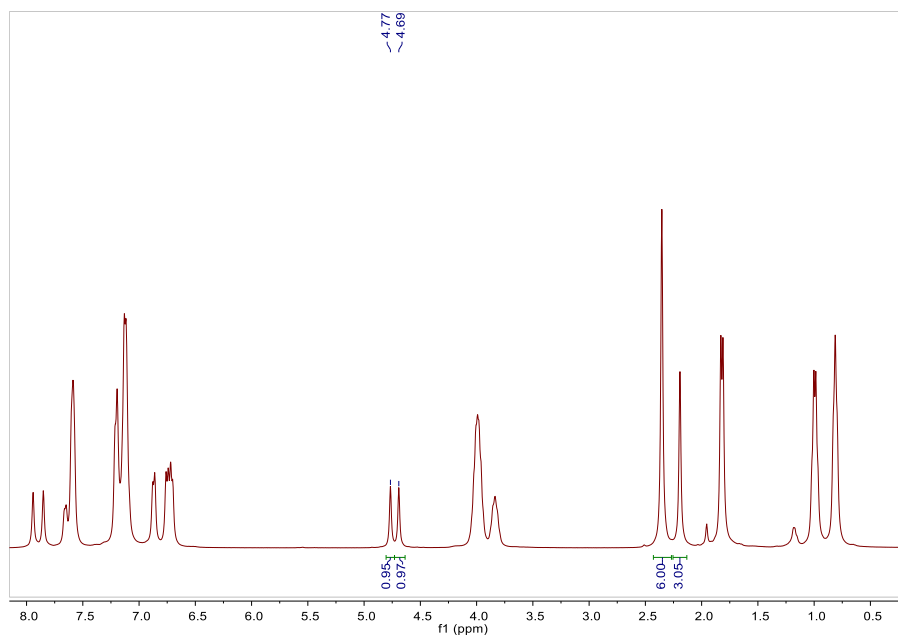

#### (9) The model reaction without imine group

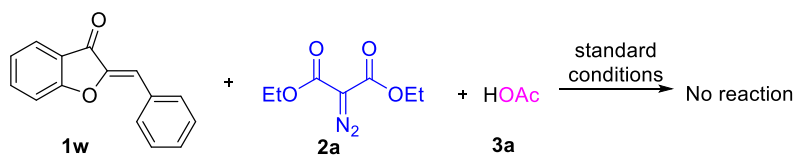

To a flame dried screw-cap tube equipped with magnetic stir bar were introduced (Z)-2-benzylidenebenzofuran-3(2H)-one **1w** (11.1 mg, 0.05 mmol), and diethyl 2-diazomalonate **2a** (23.3mg, 2.5 equiv), [RuCl<sub>2</sub>(p-cymene)]<sub>2</sub> (1.5 mg, 5 mol %), CsOAc (19.2 mg, 2 equiv), AcOH (7.3μL, 2.5 equiv), MeCN (0.5 mL). The reaction mixture was stirred in preheated oil bath at 55 °C under air atmosphere for 1 hour. No product formation was observed by TLC.

## 6. NOE Spectra of compound 4e, 5a and 5a'

<sup>1</sup>H-NMR Spectra of compound 4e:

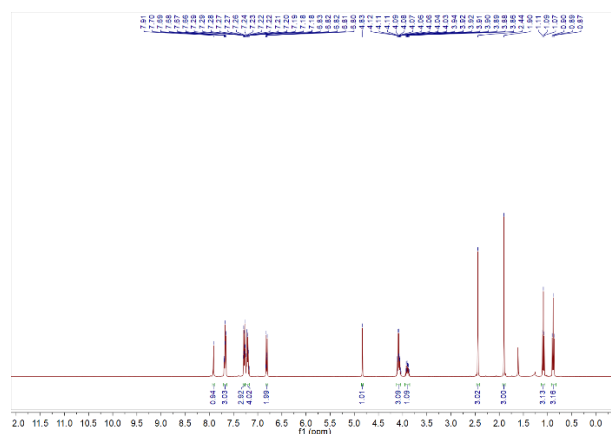

Partially magnified <sup>1</sup>H-NMR Spectra of compound 4e:

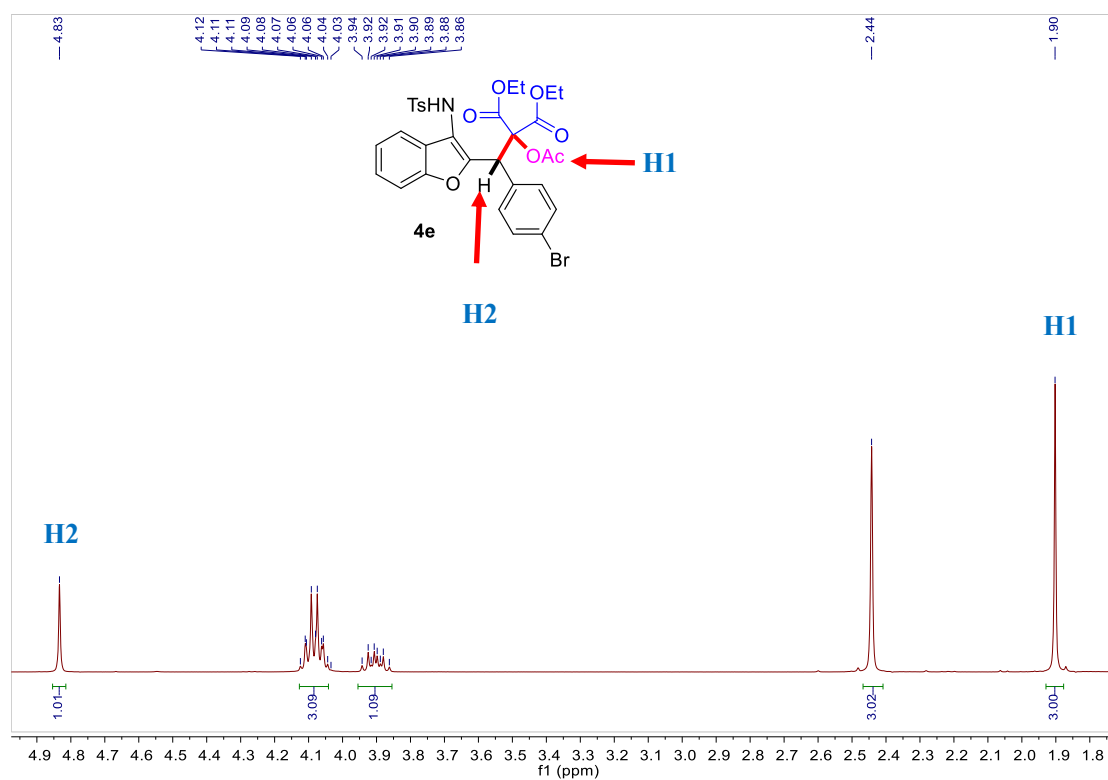

**Irradiate 1.90 ppm (H1) of compound 4e:**

H1 and H2 are responsive:

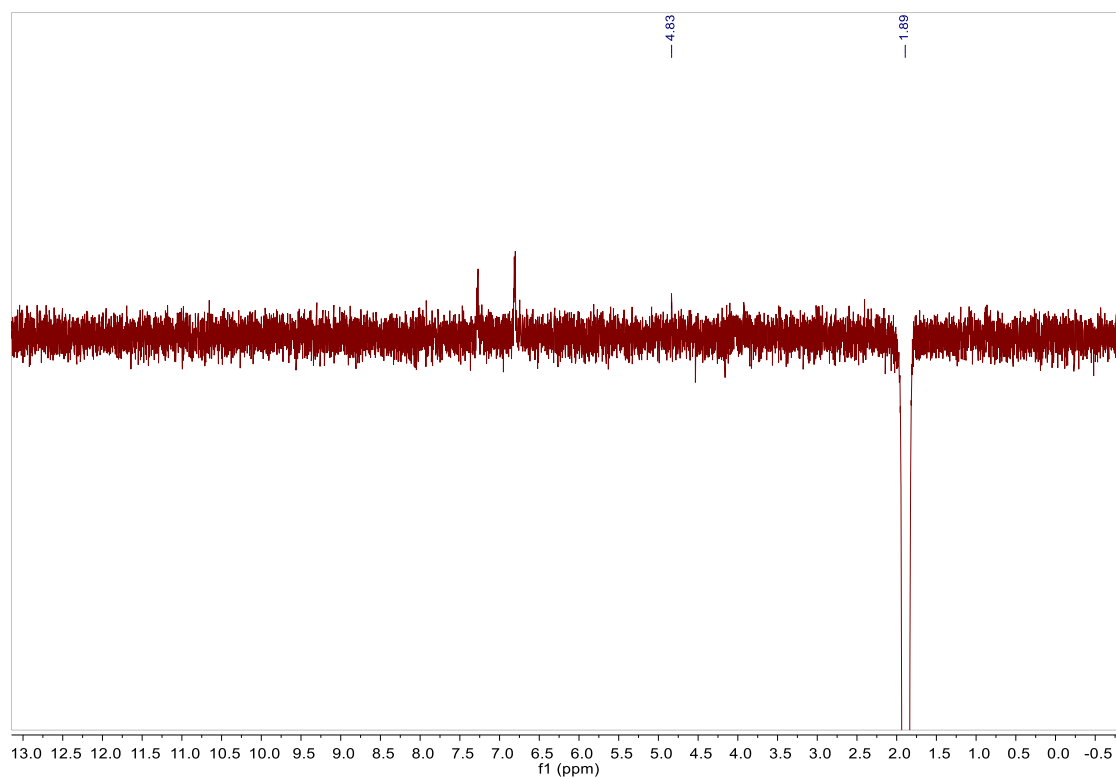

**<sup>1</sup>H-NMR Spectra of compound 5a:**

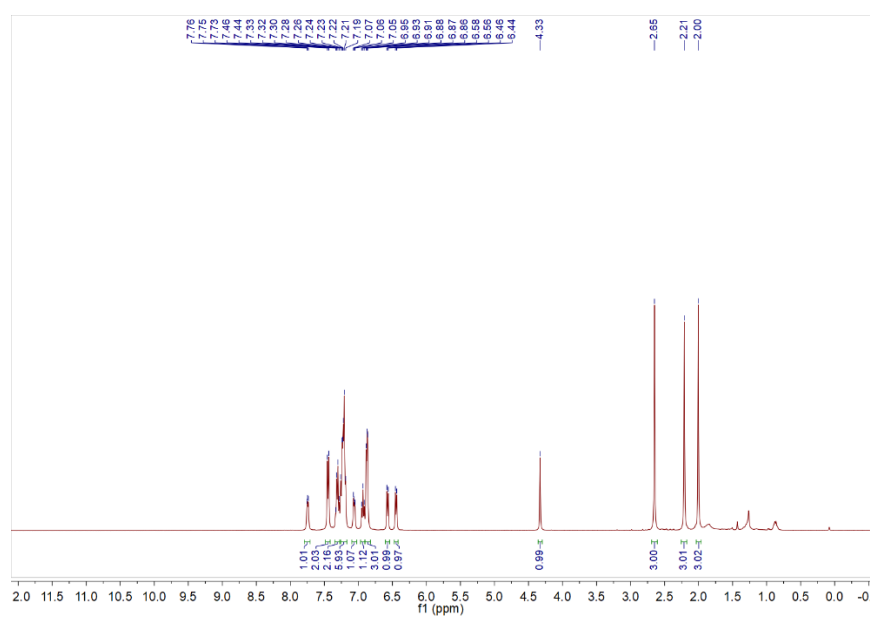

**Partially magnified <sup>1</sup>H-NMR Spectra of compound 5a:**

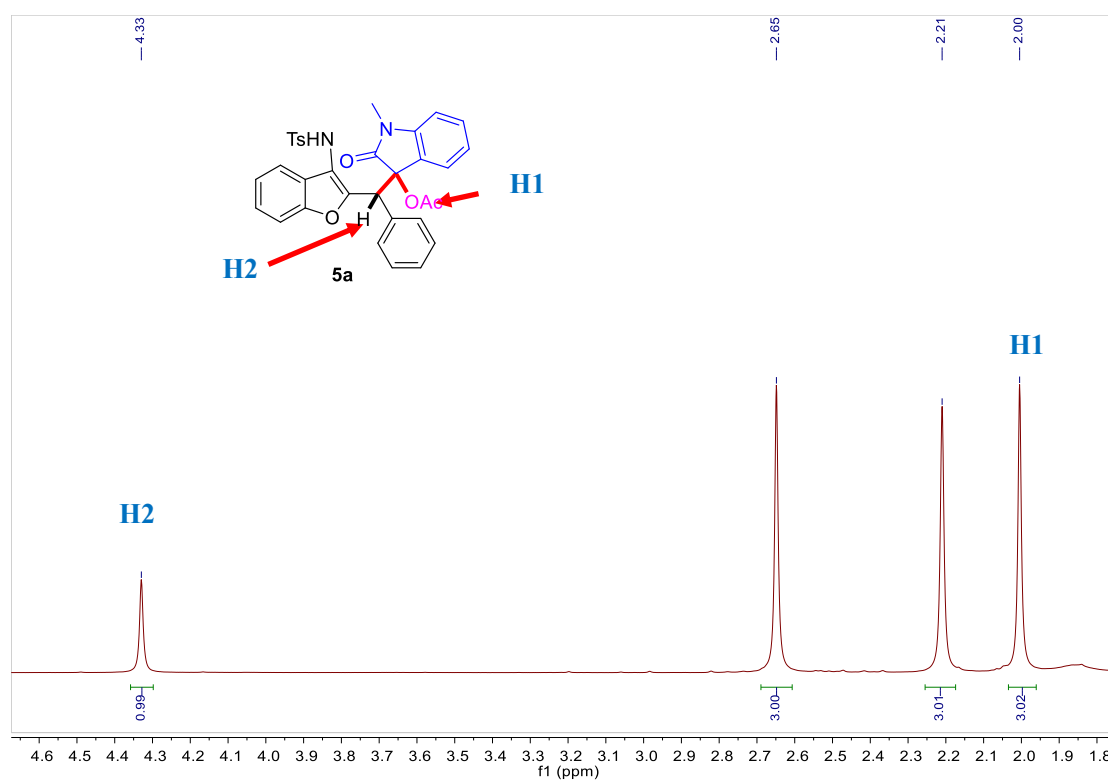

**Irradiate 2.00 ppm (H1) of compound 5a:**

H1, H2 are responsive.

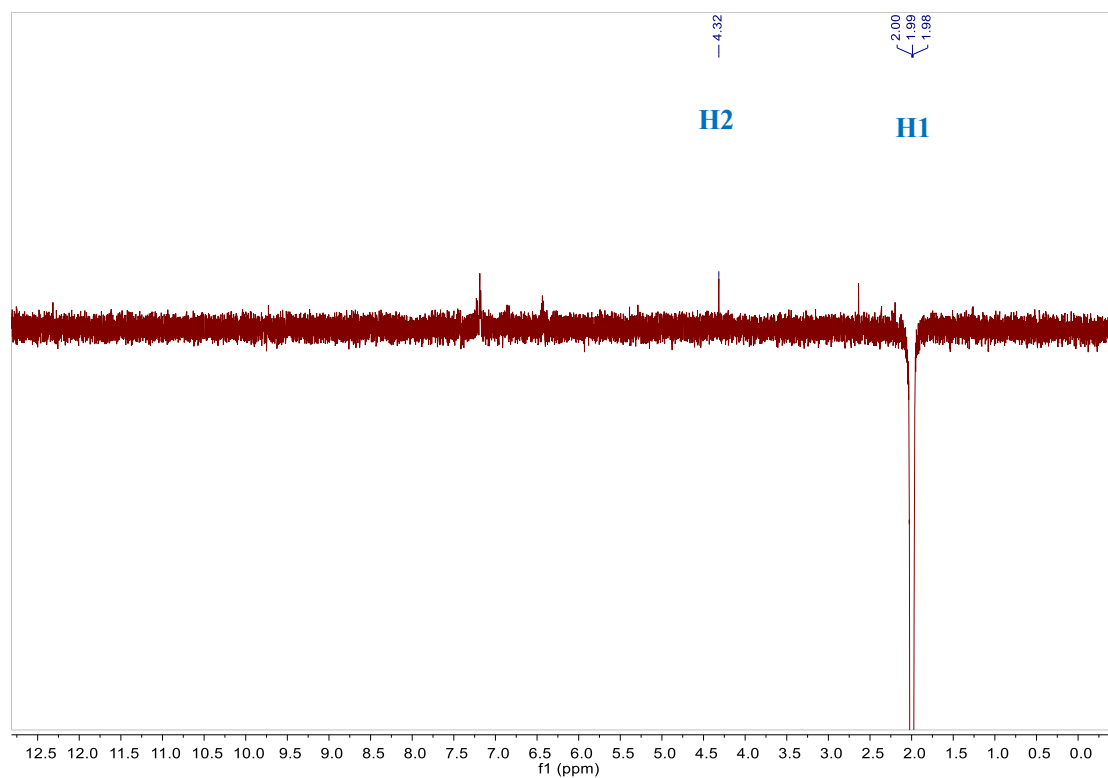

**<sup>1</sup>H-NMR Spectra of compound 5a':**

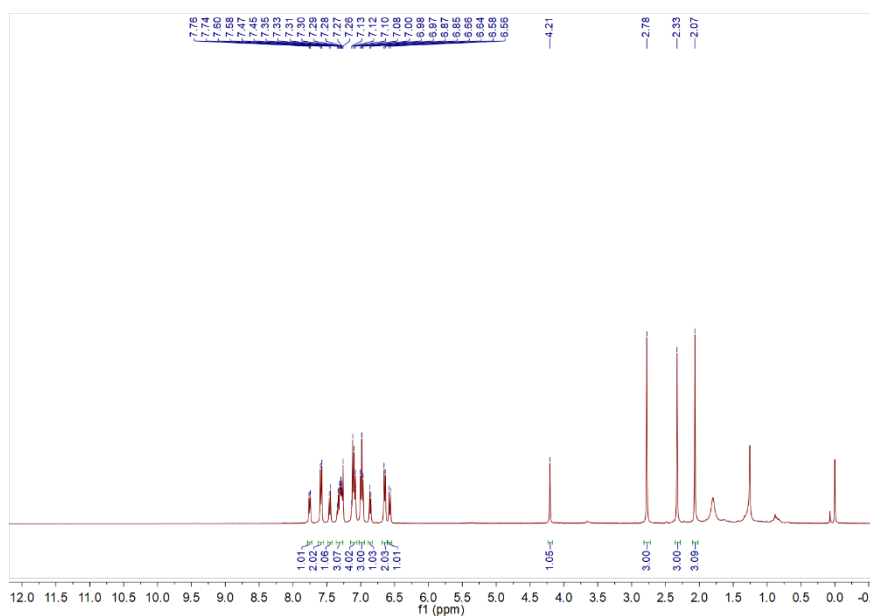

**Partially magnified <sup>1</sup>H-NMR Spectra of compound 5a':**

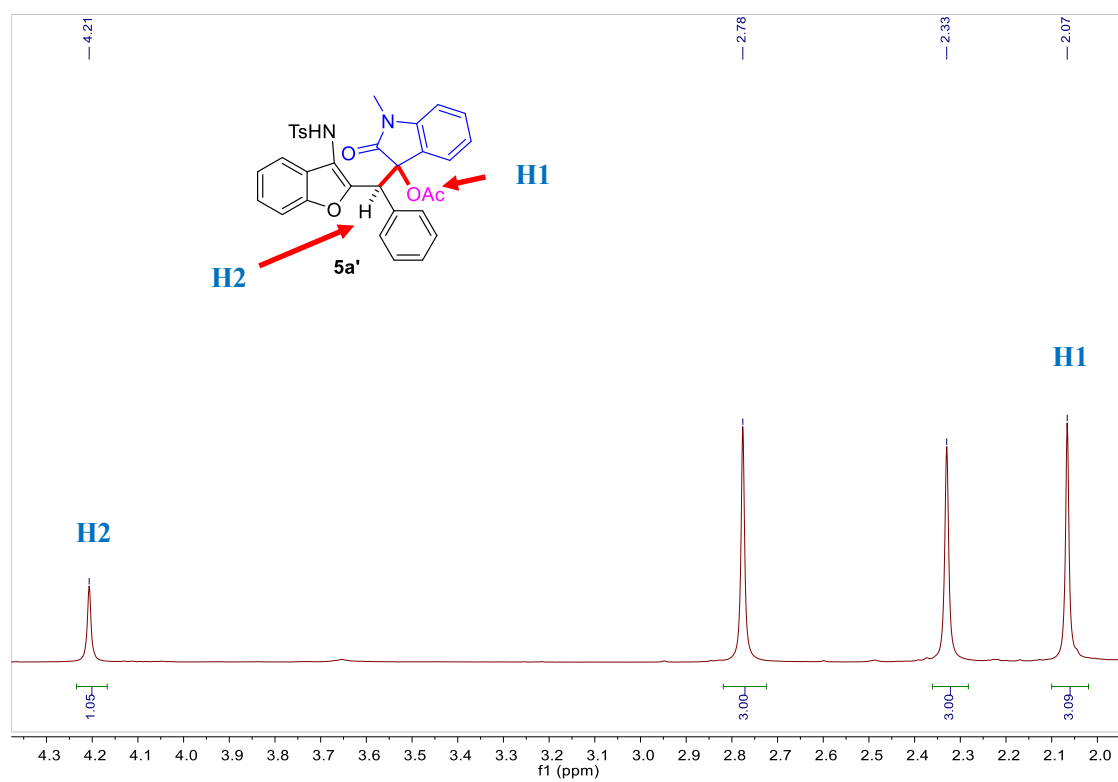

**Irradiate 2.07 ppm (H1) of compound 5a':**

H1, H2 are no responsive.

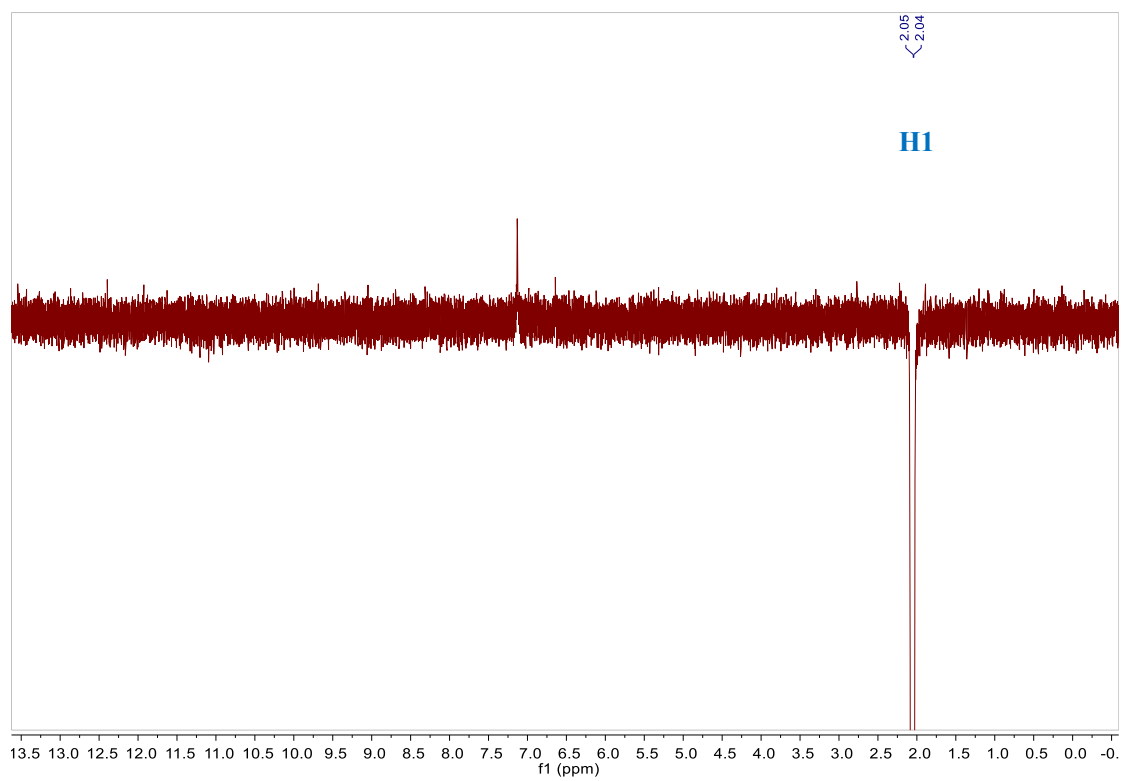

## 7. Synthetic application

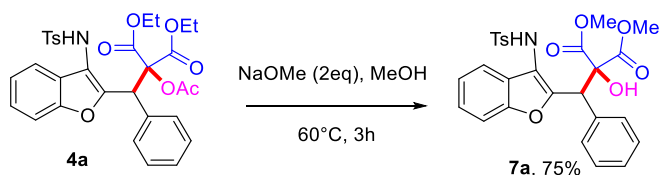

To a flame dried screw-cap tube equipped with magnetic stir bar were introduced azadiene **4a** (56.3 mg, 0.1 mmol), NaOMe (16.2 mg, 3 equiv), MeOH (1.2 mL). The reaction mixture was stirred in preheated oil bath at 60°C under air atmosphere for 3 hours. After completion, the reaction mixture was purified by flash chromatography eluting with ethyl acetate and petroleum ether (1:3) to give the product **7a** (75%).<sup>1</sup>

## References:

[1] Kanemitsu, T.; Sato, M.; Yoshida, M.; Ozasa, E.; Miyazaki, M.; Odanaka, Y.; Nagata, K.; Itoh, T. Enantioselective  $\alpha$ -Benzoyloxylolation of Malonic Diesters by Phase-Transfer Catalysis. *Org. Lett.* **2016**, 18, 5484–5487.

## 8. X-ray Data of Compound 4e and Sample Preparation

### 8.1 Sample Preparation and Crystal Measurement

Single crystals suitable for X-ray diffraction experiments were obtained by slowly evaporating a saturated solution of the corresponding compound **3ea** in DCM/petroleum ether. Single crystals of C<sub>31</sub>H<sub>30</sub>BrNO<sub>9</sub>S [exp\_2928\_auto] were [ ]. A suitable crystal was selected and [ ] on a XtaLAB Synergy R, DW system, HyPix diffractometer. The crystal was kept at 298.3(3) K during data collection. Using Olex2 [1], the structure was solved with the ShelXT [2] structure solution program using Intrinsic Phasing and refined with the ShelXL [3] refinement package using Least Squares minimisation.

1. Dolomanov, O.V., Bourhis, L.J., Gildea, R.J., Howard, J.A.K. & Puschmann, H. (2009), *J. Appl. Cryst.* 42, 339–341.

2. Sheldrick, G.M. (2015). *Acta Cryst. A* 71, 3–8.

3. Sheldrick, G.M. (2015). *Acta Cryst. C* 71, 3–8.

### 8.2 X-ray Data of Compound 4e

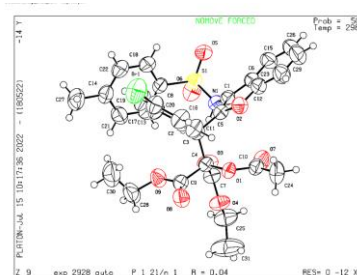

**Figure S1. X-ray structure of 4e.**

CCDC 2190884 contains the crystal data and supplementary crystallographic data as following: X-ray data of compound **4e** (C<sub>31</sub>H<sub>30</sub>BrNO<sub>9</sub>S): CCDC 2190884

**Table S1. Crystal data of 4e**

|                                                |                                                                        |
|------------------------------------------------|------------------------------------------------------------------------|
| Empirical formula                              | C <sub>31</sub> H <sub>30</sub> BrNO <sub>9</sub> S                    |
| Formula weight                                 | 672.53                                                                 |
| Temperature/K                                  | 298.3(3)                                                               |
| Crystal system                                 | monoclinic                                                             |
| Space group                                    | P2 <sub>1</sub> /n                                                     |
| a/Å                                            | 10.09350(10)                                                           |
| b/Å                                            | 13.22240(10)                                                           |
| c/Å                                            | 28.2845(2)                                                             |
| $\alpha/^\circ$                                | 90                                                                     |
| $\beta/^\circ$                                 | 93.9010(10)                                                            |
| $\gamma/^\circ$                                | 90                                                                     |
| Volume/Å <sup>3</sup>                          | 3766.11(5)                                                             |
| Z                                              | 4                                                                      |
| $\rho_{\text{calc}}/\text{g cm}^{-3}$          | 1.186                                                                  |
| $\mu/\text{mm}^{-1}$                           | 2.388                                                                  |
| F(000)                                         | 1384.0                                                                 |
| Crystal size/mm <sup>3</sup>                   | 0.18 × 0.16 × 0.15                                                     |
| Radiation                                      | CuK $\alpha$ ( $\lambda$ = 1.54184)                                    |
| 2 $\Theta$ range for data collection/ $^\circ$ | 9.122 to 153.772                                                       |
| Index ranges                                   | -12 $\leq$ h $\leq$ 12, -16 $\leq$ k $\leq$ 15, -35 $\leq$ l $\leq$ 31 |
| Reflections collected                          | 50245                                                                  |
| Independent reflections                        | 7730 [ $R_{\text{int}}$ = 0.0242, $R_{\text{sigma}}$ = 0.0159]         |
| Data/restraints/parameters                     | 7730/0/392                                                             |
| Goodness-of-fit on F <sup>2</sup>              | 1.065                                                                  |
| Final R indexes [ $I \geq 2\sigma(I)$ ]        | $R_1$ = 0.0410, $wR_2$ = 0.1229                                        |
| Final R indexes [all data]                     | $R_1$ = 0.0441, $wR_2$ = 0.1258                                        |
| Largest diff. peak/hole / e Å <sup>-3</sup>    | 0.57/-0.71                                                             |

**Table S2. Fractional Atomic Coordinates ( $\times 10^4$ ) and Equivalent Isotropic Displacement Parameters ( $\text{\AA}^2 \times 10^3$ ) for exp\_2928\_auto.  $U_{\text{eq}}$  is defined as 1/3 of the trace of the orthogonalised  $U_{ij}$  tensor.**

| Atom | x          | y          | z         | U(eq)      |
|------|------------|------------|-----------|------------|
| Br1  | 555.9(3)   | 7857.1(3)  | 5121.9(2) | 105.71(14) |
| S1   | 4656.7(4)  | 7324.7(3)  | 2383.0(2) | 54.88(12)  |
| O1   | 6118.5(10) | 5178.5(9)  | 4326.0(4) | 50.1(2)    |
| O2   | 6142.1(13) | 7431.6(10) | 4040.1(4) | 60.5(3)    |
| O3   | 5711.8(16) | 4783.3(10) | 3099.3(4) | 67.7(3)    |
| O4   | 6356.8(15) | 3678.3(10) | 3669.1(4) | 67.5(3)    |

|     |            |            |            |           |
|-----|------------|------------|------------|-----------|
| N1  | 5676.5(13) | 6845.4(11) | 2794.2(5)  | 51.3(3)   |
| O5  | 4823.3(14) | 8392.0(11) | 2397.6(6)  | 74.0(4)   |
| O6  | 4891.8(15) | 6776.4(14) | 1963.3(5)  | 75.4(4)   |
| O7  | 7805.0(14) | 5517.0(13) | 3870.8(5)  | 74.8(4)   |
| O8  | 4079.9(14) | 3990.9(12) | 4457.8(5)  | 72.1(4)   |
| O9  | 3214.3(14) | 4244.7(11) | 3716.2(5)  | 70.3(4)   |
| C1  | 5929.7(16) | 7290.5(12) | 3245.7(6)  | 50.2(3)   |
| C2  | 3586.5(16) | 6499.8(12) | 4118.3(5)  | 49.3(3)   |
| C3  | 4562.3(16) | 6112.9(12) | 3769.0(5)  | 47.3(3)   |
| C4  | 5200.2(16) | 5085.7(12) | 3920.4(5)  | 47.6(3)   |
| C5  | 5531.9(16) | 6919.4(12) | 3661.1(6)  | 49.9(3)   |
| C6  | 6835.9(18) | 8106.4(13) | 3359.7(7)  | 58.6(4)   |
| C7  | 5816.8(18) | 4527.7(13) | 3508.2(6)  | 55.3(4)   |
| C8  | 3028.8(16) | 7029.0(13) | 2527.5(6)  | 52.4(4)   |
| C9  | 4104.9(17) | 4369.1(13) | 4078.7(6)  | 52.4(4)   |
| C10 | 7398.2(17) | 5423.2(15) | 4255.3(7)  | 58.8(4)   |
| C11 | 3921.6(19) | 6615.2(16) | 4597.2(6)  | 62.6(4)   |
| C12 | 6940.4(19) | 8149.1(15) | 3848.5(8)  | 63.2(4)   |
| C13 | 2319.2(19) | 6774.3(17) | 3945.5(7)  | 65.2(5)   |
| C14 | 459.9(18)  | 6505.4(18) | 2723.5(7)  | 66.9(5)   |
| C15 | 7575(2)    | 8783.9(15) | 3102.2(9)  | 72.9(5)   |
| C16 | 3022(2)    | 7005.3(17) | 4897.7(7)  | 69.4(5)   |
| C17 | 2639(2)    | 6032.8(16) | 2514.8(9)  | 71.7(5)   |
| C18 | 2156(2)    | 7766.3(15) | 2648.2(9)  | 69.0(5)   |
| C19 | 1408(2)    | 7166(2)    | 4242.1(8)  | 76.4(6)   |
| C20 | 1785(2)    | 7284.3(17) | 4713.7(7)  | 67.6(5)   |
| C21 | 1366(2)    | 5779.3(17) | 2613.5(9)  | 75.2(5)   |
| C22 | 879(2)     | 7495.4(18) | 2745.3(10) | 77.9(6)   |
| C23 | 7757(3)    | 8820.0(19) | 4107.6(10) | 84.1(6)   |
| C24 | 8183(2)    | 5538(2)    | 4716.5(9)  | 86.5(7)   |
| C25 | 6974(3)    | 3026.9(18) | 3329.5(9)  | 85.8(7)   |
| C26 | 8388(3)    | 9460.4(19) | 3352.4(13) | 90.7(8)   |
| C27 | -933(2)    | 6203(3)    | 2829.9(12) | 98.1(8)   |
| C28 | 2070(3)    | 3591(2)    | 3786.8(11) | 95.0(8)   |
| C29 | 8470(3)    | 9480(2)    | 3844.1(13) | 96.9(8)   |
| C30 | 892(3)     | 4181(3)    | 3861.8(14) | 118.5(11) |
| C31 | 7232(6)    | 2067(3)    | 3549.3(18) | 151.5(19) |

**Table S3. Anisotropic Displacement Parameters ( $\text{\AA}^2 \times 10^3$ ) for exp\_2928\_auto. The Anisotropic displacement factor exponent takes the form:  $-2\pi^2[h^2a^{*2}U_{11}+2hka^*b^*U_{12}+\dots]$ .**

| Atom | U <sub>11</sub> | U <sub>22</sub> | U <sub>33</sub> | U <sub>23</sub> | U <sub>13</sub> | U <sub>12</sub> |
|------|-----------------|-----------------|-----------------|-----------------|-----------------|-----------------|
| Br1  | 81.56(19)       | 142.6(3)        | 96.2(2)         | -29.05(17)      | 29.97(15)       | 25.16(16)       |
| S1   | 49.7(2)         | 64.2(2)         | 51.2(2)         | 14.38(17)       | 6.58(16)        | 5.11(17)        |
| O1   | 43.4(5)         | 62.9(6)         | 43.9(5)         | 2.0(4)          | 1.4(4)          | 3.2(5)          |
| O2   | 63.6(7)         | 62.7(7)         | 54.5(6)         | -5.1(5)         | -1.0(5)         | -2.4(6)         |
| O3   | 94.5(9)         | 64.5(7)         | 45.0(6)         | 1.8(5)          | 10.8(6)         | 16.1(7)         |
| O4   | 88.3(9)         | 59.4(7)         | 56.5(7)         | 4.9(5)          | 16.2(6)         | 23.0(6)         |
| N1   | 49.0(7)         | 54.7(7)         | 50.5(7)         | 6.8(6)          | 6.3(5)          | 6.9(6)          |
| O5   | 66.6(8)         | 64.3(8)         | 90.5(10)        | 29.7(7)         | 1.4(7)          | -1.2(6)         |
| O6   | 69.3(8)         | 109.9(11)       | 48.2(6)         | 3.9(7)          | 12.3(6)         | 9.4(8)          |
| O7   | 57.1(7)         | 99.7(11)        | 69.2(8)         | 13.1(7)         | 17.1(6)         | 4.8(7)          |
| O8   | 69.5(8)         | 87.7(9)         | 58.2(7)         | 18.9(6)         | -1.3(6)         | -17.0(7)        |
| O9   | 69.4(8)         | 77.8(8)         | 61.1(7)         | 1.8(6)          | -13.6(6)        | -15.1(7)        |
| C1   | 43.7(7)         | 52.4(8)         | 54.7(8)         | 4.8(6)          | 5.2(6)          | 6.5(6)          |
| C2   | 48.9(8)         | 53.7(8)         | 45.6(7)         | 1.9(6)          | 5.0(6)          | 4.5(6)          |
| C3   | 47.8(7)         | 53.4(8)         | 40.7(7)         | 0.8(6)          | 2.3(6)          | 5.1(6)          |
| C4   | 48.9(7)         | 54.3(8)         | 39.4(7)         | 1.2(6)          | 1.0(6)          | 3.3(6)          |
| C5   | 48.6(8)         | 52.7(8)         | 48.0(8)         | 0.1(6)          | 0.7(6)          | 5.5(6)          |
| C6   | 49.8(9)         | 52.4(9)         | 74.2(11)        | 3.1(8)          | 8.4(8)          | 4.2(7)          |
| C7   | 63.2(10)        | 55.0(9)         | 48.2(8)         | 1.2(7)          | 8.1(7)          | 8.6(7)          |
| C8   | 45.8(8)         | 58.4(9)         | 53.3(8)         | 6.1(7)          | 4.0(6)          | 6.3(7)          |
| C9   | 53.2(8)         | 55.8(9)         | 48.1(8)         | 0.3(7)          | 1.3(6)          | 0.9(7)          |
| C10  | 47.2(8)         | 66.8(10)        | 62.6(10)        | 6.1(8)          | 5.0(7)          | 4.8(7)          |
| C11  | 58.7(10)        | 82.6(12)        | 46.5(8)         | -2.5(8)         | 2.3(7)          | 16.4(9)         |
| C12  | 55.1(9)         | 57.6(10)        | 76.4(12)        | -4.8(8)         | 1.2(8)          | 1.2(8)          |
| C13  | 55.7(9)         | 86.5(13)        | 52.7(9)         | -3.8(9)         | -0.4(7)         | 12.5(9)         |
| C14  | 49.1(9)         | 85.4(13)        | 66.4(10)        | 10.2(9)         | 4.9(8)          | 3.4(9)          |
| C15  | 64.3(11)        | 58.3(10)        | 98.1(15)        | 8.0(10)         | 19.9(10)        | -1.5(9)         |
| C16  | 71.1(12)        | 87.3(13)        | 50.3(9)         | -6.9(9)         | 8.7(8)          | 14.4(10)        |
| C17  | 61.7(10)        | 59.1(10)        | 96.1(14)        | -6.9(10)        | 19.3(10)        | 4.0(8)          |
| C18  | 58.6(10)        | 58.1(10)        | 90.8(14)        | 2.7(9)          | 9.8(10)         | 9.8(8)          |
| C19  | 51.7(10)        | 105.0(17)       | 72.3(12)        | -7.2(11)        | 3.7(9)          | 19.6(10)        |
| C20  | 60.2(10)        | 78.6(12)        | 66.0(11)        | -8.3(9)         | 17.9(9)         | 9.7(9)          |
| C21  | 63.6(11)        | 65.3(11)        | 98.0(15)        | -5.9(10)        | 16.0(10)        | -8.0(9)         |
| C22  | 55.5(11)        | 76.0(13)        | 103.6(16)       | 1.4(12)         | 15.3(10)        | 18.7(10)        |
| C23  | 77.7(14)        | 76.2(14)        | 96.4(16)        | -18.6(12)       | -6.9(12)        | -6.6(11)        |
| C24  | 56.3(11)        | 124(2)          | 77.6(13)        | 0.8(13)         | -8.0(10)        | -12.9(12)       |
| C25  | 110.2(19)       | 74.9(13)        | 75.4(13)        | -3.2(10)        | 29.4(13)        | 31.4(13)        |

|     |          |          |           |           |           |           |
|-----|----------|----------|-----------|-----------|-----------|-----------|
| C26 | 73.3(14) | 63.7(12) | 136(2)    | 0.5(13)   | 16.7(14)  | -13.2(10) |
| C27 | 55.5(12) | 122(2)   | 119(2)    | 18.3(17)  | 20.1(12)  | -0.6(13)  |
| C28 | 89.3(17) | 89.7(16) | 101.7(18) | 4.7(14)   | -24.7(14) | -34.2(14) |
| C29 | 74.2(14) | 72.7(14) | 143(3)    | -18.3(15) | 0.7(15)   | -16.3(11) |
| C30 | 74.3(16) | 149(3)   | 132(3)    | 15(2)     | 7.2(16)   | -23.3(18) |
| C31 | 214(5)   | 91(2)    | 160(3)    | 23(2)     | 92(3)     | 66(3)     |

**Table S4. Bond Lengths for exp\_2928\_auto.**

| Atom | Atom | Length/Å   | Atom | Atom | Length/Å |
|------|------|------------|------|------|----------|
| Br1  | C20  | 1.9080(19) | C3   | C5   | 1.493(2) |
| S1   | N1   | 1.6282(14) | C4   | C7   | 1.546(2) |
| S1   | O5   | 1.4215(16) | C4   | C9   | 1.545(2) |
| S1   | O6   | 1.4246(15) | C6   | C12  | 1.381(3) |
| S1   | C8   | 1.7639(18) | C6   | C15  | 1.401(3) |
| O1   | C4   | 1.4301(18) | C8   | C17  | 1.374(3) |
| O1   | C10  | 1.359(2)   | C8   | C18  | 1.373(3) |
| O2   | C5   | 1.377(2)   | C10  | C24  | 1.487(3) |
| O2   | C12  | 1.379(2)   | C11  | C16  | 1.385(3) |
| O3   | C7   | 1.203(2)   | C12  | C23  | 1.386(3) |
| O4   | C7   | 1.316(2)   | C13  | C19  | 1.387(3) |
| O4   | C25  | 1.461(2)   | C14  | C21  | 1.376(3) |
| N1   | C1   | 1.414(2)   | C14  | C22  | 1.376(3) |
| O7   | C10  | 1.195(2)   | C14  | C27  | 1.511(3) |
| O8   | C9   | 1.185(2)   | C15  | C26  | 1.377(4) |
| O9   | C9   | 1.327(2)   | C16  | C20  | 1.371(3) |
| O9   | C28  | 1.467(3)   | C17  | C21  | 1.375(3) |
| C1   | C5   | 1.359(2)   | C18  | C22  | 1.383(3) |
| C1   | C6   | 1.437(3)   | C19  | C20  | 1.371(3) |
| C2   | C3   | 1.530(2)   | C23  | C29  | 1.381(4) |
| C2   | C11  | 1.382(2)   | C25  | C31  | 1.429(4) |
| C2   | C13  | 1.386(2)   | C26  | C29  | 1.388(4) |
| C3   | C4   | 1.551(2)   | C28  | C30  | 1.449(5) |

**Table S5. Bond Angles for exp\_2928\_auto.**

| Atom | Atom | Atom | Angle/°   | Atom | Atom | Atom | Angle/°    |
|------|------|------|-----------|------|------|------|------------|
| N1   | S1   | C8   | 107.57(8) | O4   | C7   | C4   | 108.97(13) |
| O5   | S1   | N1   | 107.33(8) | C17  | C8   | S1   | 118.40(14) |

|     |    |     |            |         |     |            |
|-----|----|-----|------------|---------|-----|------------|
| O5  | S1 | O6  | 120.23(10) | C18 C8  | S1  | 121.61(14) |
| O5  | S1 | C8  | 108.87(9)  | C18 C8  | C17 | 119.99(17) |
| O6  | S1 | N1  | 105.32(8)  | O8 C9   | O9  | 126.29(17) |
| O6  | S1 | C8  | 106.91(9)  | O8 C9   | C4  | 125.49(15) |
| C10 | O1 | C4  | 118.23(13) | O9 C9   | C4  | 108.22(13) |
| C5  | O2 | C12 | 105.95(14) | O1 C10  | C24 | 110.51(16) |
| C7  | O4 | C25 | 117.45(15) | O7 C10  | O1  | 123.18(17) |
| C1  | N1 | S1  | 123.36(11) | O7 C10  | C24 | 126.30(19) |
| C9  | O9 | C28 | 117.78(16) | C2 C11  | C16 | 121.04(17) |
| N1  | C1 | C6  | 126.06(15) | O2 C12  | C6  | 111.00(16) |
| C5  | C1 | N1  | 125.79(15) | O2 C12  | C23 | 125.1(2)   |
| C5  | C1 | C6  | 107.34(16) | C6 C12  | C23 | 123.9(2)   |
| C11 | C2 | C3  | 122.99(15) | C2 C13  | C19 | 121.23(18) |
| C11 | C2 | C13 | 118.37(16) | C21 C14 | C27 | 120.2(2)   |
| C13 | C2 | C3  | 118.61(14) | C22 C14 | C21 | 117.84(18) |
| C2  | C3 | C4  | 112.82(13) | C22 C14 | C27 | 122.0(2)   |
| C5  | C3 | C2  | 110.67(13) | C26 C15 | C6  | 117.9(2)   |
| C5  | C3 | C4  | 114.61(13) | C20 C16 | C11 | 119.05(18) |
| O1  | C4 | C3  | 112.37(12) | C8 C17  | C21 | 119.86(19) |
| O1  | C4 | C7  | 111.94(13) | C8 C18  | C22 | 119.22(19) |
| O1  | C4 | C9  | 104.93(12) | C20 C19 | C13 | 118.67(18) |
| C7  | C4 | C3  | 112.99(12) | C16 C20 | Br1 | 119.35(15) |
| C9  | C4 | C3  | 108.98(13) | C16 C20 | C19 | 121.62(18) |
| C9  | C4 | C7  | 104.98(13) | C19 C20 | Br1 | 119.04(15) |
| O2  | C5 | C3  | 117.18(14) | C17 C21 | C14 | 121.4(2)   |
| C1  | C5 | O2  | 110.64(15) | C14 C22 | C18 | 121.67(19) |
| C1  | C5 | C3  | 132.15(15) | C29 C23 | C12 | 115.6(3)   |
| C12 | C6 | C1  | 105.05(16) | C31 C25 | O4  | 108.1(2)   |
| C12 | C6 | C15 | 119.17(19) | C15 C26 | C29 | 121.3(2)   |
| C15 | C6 | C1  | 135.8(2)   | C30 C28 | O9  | 111.4(2)   |
| O3  | C7 | O4  | 125.42(16) | C23 C29 | C26 | 122.1(2)   |
| O3  | C7 | C4  | 125.28(15) |         |     |            |

**Table S6. Hydrogen Atom Coordinates ( $\text{\AA}\times 10^4$ ) and Isotropic Displacement Parameters ( $\text{\AA}^2\times 10^3$ ) for exp\_2928\_auto.**

| Atom | <i>x</i> | <i>y</i> | <i>z</i> | U(eq) |
|------|----------|----------|----------|-------|
| H1   | 5505     | 6213     | 2827     | 62    |
| H3   | 4034     | 5983     | 3472     | 57    |
| H11  | 4764     | 6428     | 4720     | 75    |

|      |       |      |      |     |
|------|-------|------|------|-----|
| H13  | 2076  | 6694 | 3625 | 78  |
| H15  | 7518  | 8777 | 2773 | 88  |
| H16  | 3254  | 7077 | 5220 | 83  |
| H17  | 3236  | 5531 | 2440 | 86  |
| H18  | 2419  | 8440 | 2664 | 83  |
| H19  | 558   | 7344 | 4124 | 92  |
| H21  | 1112  | 5103 | 2606 | 90  |
| H22  | 288   | 7995 | 2827 | 94  |
| H23  | 7821  | 8825 | 4437 | 101 |
| H24A | 7788  | 6052 | 4901 | 130 |
| H24B | 9077  | 5729 | 4661 | 130 |
| H24C | 8192  | 4908 | 4885 | 130 |
| H25A | 6384  | 2945 | 3047 | 103 |
| H25B | 7796  | 3327 | 3239 | 103 |
| H26  | 8893  | 9913 | 3189 | 109 |
| H27A | -1047 | 5490 | 2779 | 147 |
| H27B | -1562 | 6566 | 2624 | 147 |
| H27C | -1075 | 6363 | 3154 | 147 |
| H28A | 1901  | 3163 | 3511 | 114 |
| H28B | 2271  | 3158 | 4059 | 114 |
| H29  | 9023  | 9952 | 4001 | 116 |
| H30A | 687   | 4606 | 3592 | 178 |
| H30B | 1050  | 4593 | 4139 | 178 |
| H30C | 160   | 3734 | 3904 | 178 |
| H31A | 7727  | 1652 | 3345 | 227 |
| H31B | 6407  | 1742 | 3604 | 227 |
| H31C | 7738  | 2163 | 3846 | 227 |

**Table S7. Solvent masks information for exp\_2928\_auto.**

| Number | X      | Y     | Z     | Volume | Electron<br>count | Content |
|--------|--------|-------|-------|--------|-------------------|---------|
| 1      | -0.494 | 0.000 | 0.500 | 450.1  | 96.4              | ?       |
| 2      | -0.384 | 0.500 | 0.000 | 450.1  | 96.4              | ?       |

## 9. Characterization Data and NMR Spectra

**Diethyl(S)-2-acetoxy-2-((3-((4-methylphenyl)sulfonamido)benzofuran-2-yl)(phenyl)methyl)malonate (4a)**

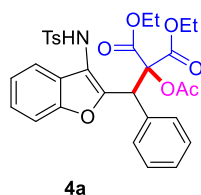

**4a** 52.8 mg, 89% yield; white powder; eluent (petroleum ether/ethyl acetate = 5:1). <sup>1</sup>H NMR (400 MHz, CDCl<sub>3</sub>) δ 8.02 (s, 1NH), 7.75 (dd, *J* = 6.7, 2.3 Hz, 1H), 7.68 (d, *J* = 8.1 Hz, 2H), 7.31 – 7.28 (m, 1H), 7.20 (qd, *J* = 5.9, 5.5, 1.6 Hz, 5H), 7.14 (t, *J* = 7.3 Hz, 2H), 6.94 – 6.85 (m, 2H), 4.82 (s, 1H), 4.14 – 4.01 (m, 3H), 3.91 (dq, *J* = 10.7, 7.2 Hz, 1H), 2.44 (s, 3H), 1.87 (s, 3H), 1.05 (t, *J* = 7.1 Hz, 3H), 0.89 (t, *J* = 7.1 Hz, 3H). <sup>13</sup>C NMR (100 MHz, CDCl<sub>3</sub>) δ 168.8, 166.2, 166.1, 153.6, 147.0, 143.6, 136.8, 133.6, 130.4, 129.8, 127.8, 127.8, 127.5, 125.8, 124.9, 123.3, 121.5, 116.3, 110.7, 83.1, 63.2, 62.9, 45.7, 21.6, 20.2, 13.6, 13.3. HRMS (ESI-TOF) *m/z*: [M + Na]<sup>+</sup> Calcd for C<sub>31</sub>H<sub>31</sub>NNaO<sub>9</sub>S<sup>+</sup> 616.1612; Found 616.1612.

**Diethyl(R)-2-acetoxy-2-((6-methyl-3-((4-methylphenyl)sulfonamido)benzofuran-2-yl)(phenyl)methyl)malonate (4b)**

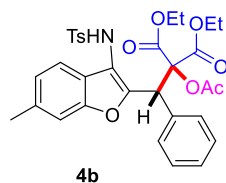

**4b** 45.7mg, 75% yield; white powder; eluent (petroleum ether/ethyl acetate = 5:1). <sup>1</sup>H NMR (400 MHz, CDCl<sub>3</sub>) δ 7.96 (s, 1NH), 7.67 (d, *J* = 8.3 Hz, 2H), 7.62 (d, *J* = 8.1 Hz, 1H), 7.19 (dd, *J* = 7.8, 6.3 Hz, 3H), 7.16 – 7.09 (m, 3H), 7.03 (dd, *J* = 8.1, 1.4 Hz, 1H), 6.91 – 6.85 (m, 2H), 4.77 (s, 1H), 4.13 – 4.01 (m, 3H), 3.92 (dd, *J* = 10.7, 7.1 Hz, 1H), 2.43 (s, 3H), 2.40 (s, 3H), 1.88 (s, 3H), 1.05 (t, *J* = 7.1 Hz, 3H), 0.92 (t, *J* = 7.1 Hz, 3H). <sup>13</sup>C NMR (100 MHz, CDCl<sub>3</sub>) δ 168.8, 166.2, 165.9, 151.4, 148.6, 143.7, 137.6, 133.7, 130.8, 130.6, 129.9, 128.3, 127.9, 127.8, 127.5, 126.5, 126.1, 124.8, 124.4, 117.6, 111.6, 83.6, 63.1, 62.8, 45.7, 21.6, 20.3, 13.7, 13.4. RMS (ESI-TOF) *m/z*: [M + H]<sup>+</sup> Calcd for C<sub>32</sub>H<sub>34</sub>NO<sub>9</sub>S 608.1949; Found 608.1955.

**Diethyl(R)-2-acetoxy-2-((3-((4-methylphenyl)sulfonamido)naphtho[2,3-b]furan-2-yl)(phenyl)methyl)malonate (4c)**

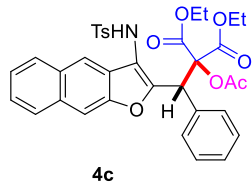

**4c** 59.8 mg, 93% yield; White powder; eluent (petroleum ether/ethyl acetate = 5:1). <sup>1</sup>H NMR (400 MHz, CDCl<sub>3</sub>) δ 8.68 (d, *J* = 7.5 Hz, 1H), 7.98 (s, 1NH), 7.84 (dd, *J* = 7.9, 1.6 Hz, 1H), 7.77 (d, *J* = 8.0 Hz, 2H), 7.66 (d, *J* = 9.0 Hz, 1H), 7.51 – 7.40 (m, 3H), 7.25 – 7.18 (m, 5H), 7.06 (dt, *J* = 6.6, 1.6 Hz, 2H), 5.05 (s, 1H), 4.05 (q, *J* = 7.2 Hz, 3H), 3.90 (dd, *J* = 10.7, 7.1 Hz, 1H), 2.43 (s, 3H), 1.91 (s, 3H), 1.06 (t, *J* = 7.1 Hz, 3H), 0.88 (t, *J* = 7.1 Hz, 3H). <sup>13</sup>C NMR (100 MHz, CDCl<sub>3</sub>) δ 168.8, 166.2, 154.0, 146.1, 143.5, 136.8, 135.3, 133.7, 130.4, 129.8, 127.8, 127.7, 127.5, 124.8, 120.9, 116.1, 110.9, 83.2, 63.2, 62.8, 45.7, 21.6, 21.6, 20.2, 13.6, 13.4. HRMS (ESI-TOF) *m/z*: [M + Na]<sup>+</sup> Calcd for C<sub>35</sub>H<sub>33</sub>NNaO<sub>9</sub>S<sup>+</sup> 666.1768; Found 666.1771.

**Diethyl(R)-2-acetoxy-2-((4-((4-methylphenyl)sulfonamido)-2H-chromen-3-yl)(phenyl)methyl)malonate (4d)**

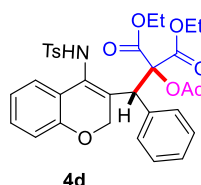

**4d** 31.7 mg, 52% yield; white powder; eluent (petroleum ether/ethyl acetate = 5:1). <sup>1</sup>H NMR (400 MHz, CDCl<sub>3</sub>) δ 7.71 (d, *J* = 8.0 Hz, 2H), 7.33 (dd, *J* = 6.8, 2.8 Hz, 2H), 7.25 – 7.21 (m, 3H), 7.18 (d, *J* = 7.9 Hz, 2H), 7.04 (td, *J* = 7.7, 1.5 Hz, 1H), 6.88 (dd, *J* = 7.7, 1.6 Hz, 1H), 6.72 (dd, *J* = 8.1, 1.1 Hz, 1H), 6.63 (td, *J* = 7.6, 1.2 Hz, 1H), 6.50 (s, 1NH), 5.22 (s, 1H), 4.87 – 4.72 (m, 2H), 4.21 (qd, *J* = 7.1, 2.2 Hz, 2H), 3.98 (qd, *J* = 7.1, 1.2 Hz, 2H), 2.36 (s, 3H), 2.23 (s, 3H), 1.19 (t, *J* = 7.1 Hz, 3H), 0.94 (t, *J* = 7.1 Hz, 3H). <sup>13</sup>C NMR (100 MHz, CDCl<sub>3</sub>) δ 168.7, 166.4, 165.3, 154.8, 143.9, 137.4, 135.9, 129.7, 129.7, 129.4, 129.0, 128.4, 128.0, 127.7, 127.4, 124.9, 121.0, 115.6, 85.2, 66.5, 63.0, 62.6, 49.4,

21.5, 21.0, 13.7, 13.5. HRMS (ESI-TOF)  $m/z$ :  $[M + H]^+$  Calcd for  $C_{32}H_{33}NO_9S$  608.1949; Found 608.1954.

**Diethyl(R)-2-acetoxy-2-((4-bromophenyl)(3-((4-methylphenyl)sulfonamido)benzofuran-2-yl)methyl)malonate (4e)**

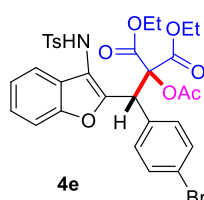

54.3 mg, 80% yield; white powder; eluent (petroleum ether/ethyl acetate = 5:1).  $^1H$  NMR (400 MHz,  $CDCl_3$ )  $\delta$  7.91 (s, 1NH), 7.68 (dd,  $J = 8.4, 6.6$  Hz, 3H), 7.28 (dd,  $J = 8.8, 2.2$  Hz, 3H), 7.25 – 7.17 (m, 4H), 6.84 – 6.79 (m, 2H), 4.83 (s, 1H), 4.08 (qd,  $J = 7.2, 3.3$  Hz, 3H), 3.90 (dq,  $J = 10.6, 7.1$  Hz, 1H), 2.44 (s, 3H), 1.90 (s, 3H), 1.09 (t,  $J = 7.1$  Hz, 3H), 0.89 (t,  $J = 7.1$  Hz, 3H).  $^{13}C$  NMR (101 MHz,  $CDCl_3$ )  $\delta$  168.8, 166.1, 165.9, 153.6, 146.5, 143.7, 136.8, 132.6, 132.1, 131.0, 129.8, 127.6, 125.7, 125.1, 123.4, 122.1, 121.4, 116.4, 110.7, 82.9, 63.3, 63.0, 45.1, 21.6, 20.3, 13.7, 13.3. HRMS (ESI-TOF)  $m/z$ :  $[M + H]^+$  Calcd for  $C_{31}H_{30}BrNO_9S$  672.0897; Found 672.0890.

**Diethyl(R)-2-acetoxy-2-((4-chlorophenyl)(3-((4-methylphenyl)sulfonamido)benzofuran-2-yl)methyl)malonate (4f)**

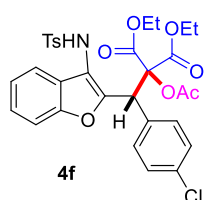

55.8 mg, 89% yield; white powder; eluent (petroleum ether/ethyl acetate = 5:1).  $^1H$  NMR (400 MHz,  $CDCl_3$ )  $\delta$  7.92 (s, 1NH), 7.68 (dd,  $J = 8.4, 6.7$  Hz, 3H), 7.31 – 7.27 (m, 1H), 7.25 – 7.17 (m, 4H), 7.15 – 7.10 (m, 2H), 6.90 – 6.85 (m, 2H), 4.85 (s, 1H), 4.08 (q,  $J = 7.0$  Hz, 3H), 3.90 (dq,  $J = 10.7, 7.2$  Hz, 1H), 2.44 (s, 3H), 1.90 (s, 3H), 1.09 (t,  $J = 7.1$  Hz, 3H), 0.89 (t,  $J = 7.1$  Hz, 3H).  $^{13}C$  NMR (100 MHz,  $CDCl_3$ )  $\delta$  168.8, 166.1, 153.6, 146.6, 143.7, 136.8, 133.9, 132.1, 131.8, 129.8, 128.0, 127.6, 125.7, 125.1, 123.4, 121.4, 116.4, 110.7, 82.9, 63.3, 63.0, 45.1, 21.6, 20.3, 13.7, 13.3. HRMS (ESI-TOF)  $m/z$ :  $[M + Na]^+$  Calcd for  $C_{31}H_{30}ClNNaO_9S^+$  650.1222; Found 650.1219.

**Diethyl(R)-2-acetoxy-2-((3-((4-methylphenyl)sulfonamido)benzofuran-2-yl)(p-tolyl)methyl)malonate (4g)**

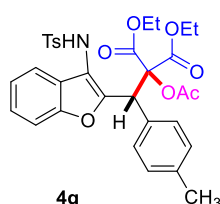

55.8 mg, 92% yield; white powder; eluent (petroleum ether/ethyl acetate = 5:1).  $^1H$  NMR (400 MHz,  $CDCl_3$ )  $\delta$  8.01 (s, 1NH), 7.77 – 7.71 (m, 1H), 7.68 (d,  $J = 8.1$  Hz, 2H), 7.30 – 7.26 (m, 1H), 7.21 (dt,  $J = 9.1, 2.6$  Hz, 4H), 6.95 (d,  $J = 7.9$  Hz, 2H), 6.78 (d,  $J = 7.9$  Hz, 2H), 4.77 (s, 1H), 4.07 (dq,  $J = 14.3, 7.1$  Hz, 3H), 3.91 (dq,  $J = 10.6, 7.2$  Hz, 1H), 2.44 (s, 3H), 2.27 (s, 3H), 1.89 (s, 3H), 1.07 (t,  $J = 7.1$  Hz, 3H), 0.89 (t,  $J = 7.1$  Hz, 3H).  $^{13}C$  NMR (100 MHz,  $CDCl_3$ )  $\delta$  166.2, 153.6, 147.3, 143.5, 137.6, 136.9, 130.5, 130.3, 129.8, 128.5, 127.5, 125.8, 124.9, 123.3, 121.4, 116.1, 110.7, 83.3, 76.7, 63.2, 62.8, 45.3, 21.6, 21.1, 20.3, 13.7, 13.3. HRMS (ESI-TOF)  $m/z$ :  $[M + Na]^+$  Calcd for  $C_{32}H_{33}NNaO_9S^+$  630.1768; Found 630.1767.

**Diethyl(R)-2-acetoxy-2-((4-methoxyphenyl)(3-((4-methylphenyl)sulfonamido)benzofuran-2-yl)methyl)malonate (4h)**

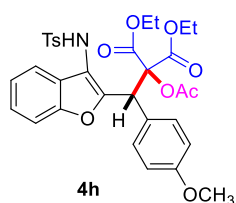

57.3 mg, 92% yield; white powder; eluent (petroleum ether/ethyl acetate = 5:1).  $^1\text{H}$  NMR (400 MHz,  $\text{CDCl}_3$ )  $\delta$  7.99 (s, 1NH), 7.76 – 7.70 (m, 1H), 7.67 (d,  $J$  = 8.0 Hz, 2H), 7.30 – 7.26 (m, 1H), 7.24 – 7.17 (m, 4H), 6.87 – 6.80 (m, 2H), 6.70 – 6.65 (m, 2H), 4.76 (s, 1H), 4.06 (q,  $J$  = 7.1 Hz, 3H), 3.90 (dq,  $J$  = 10.6, 7.2 Hz, 1H), 3.76 (s, 3H), 2.44 (s, 3H), 1.89 (s, 3H), 1.08 (t,  $J$  = 7.1 Hz, 3H), 0.89 (t,  $J$  = 7.2 Hz, 3H).  $^{13}\text{C}$  NMR (100 MHz,  $\text{CDCl}_3$ )  $\delta$  168.8, 166.2, 159.1, 153.6, 147.4, 143.5, 136.8, 131.6, 129.8, 127.5, 125.8, 125.6, 124.9, 123.3, 121.4, 116.0, 113.1, 110.7, 83.3, 63.2, 62.8, 55.2, 44.9, 21.6, 20.3, 13.7, 13.3. HRMS (ESI-TOF)  $m/z$ :  $[\text{M} + \text{H}]^+$  Calcd for  $\text{C}_{32}\text{H}_{34}\text{NNaO}_{10}\text{S}^+$  646.1717; Found 646.1716.

**diethyl(R)-2-acetoxy-2-((3-chlorophenyl)(3-((4-methylphenyl)sulfonamido)benzofuran-2-yl)methyl)malonate (4i)**

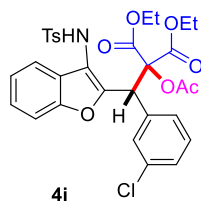

57.0 mg, 91% yield; colorless oil; eluent (petroleum ether/ethyl acetate = 5:1).  $^1\text{H}$  NMR (400 MHz,  $\text{CDCl}_3$ )  $\delta$  7.97 (s, 1NH), 7.76 – 7.72 (m, 1H), 7.70 (d,  $J$  = 8.0 Hz, 2H), 7.33 – 7.28 (m, 1H), 7.26 – 7.18 (m, 5H), 7.13 (t,  $J$  = 7.9 Hz, 1H), 7.03 (dt,  $J$  = 7.8, 1.5 Hz, 1H), 6.81 (t,  $J$  = 1.8 Hz, 1H), 4.83 (s, 1H), 4.08 (qd,  $J$  = 7.2, 6.2, 1.5 Hz, 3H), 3.93 (dd,  $J$  = 10.7, 7.1 Hz, 1H), 2.43 (s, 3H), 1.92 (s, 3H), 1.08 (t,  $J$  = 7.1 Hz, 3H), 0.91 (t,  $J$  = 7.2 Hz, 3H).  $^{13}\text{C}$  NMR (100 MHz,  $\text{CDCl}_3$ )  $\delta$  168.8, 166.0, 165.9, 153.6, 146.2, 143.9, 136.9, 135.5, 133.5, 130.3, 129.9, 129.1, 128.7, 128.1, 127.4, 125.8, 125.2, 123.5, 121.5, 116.7, 110.8, 83.0, 63.4, 63.0, 45.4, 21.8, 20.2, 13.6, 13.3. HRMS (ESI-TOF)  $m/z$ :  $[\text{M} + \text{Na}]^+$  Calcd for  $\text{C}_{31}\text{H}_{30}\text{ClNNaO}_9\text{S}^+$  650.1222 ; Found 650.1227.

**Diethyl(R)-2-acetoxy-2-((3-methoxyphenyl)(3-((4-methylphenyl)sulfonamido)benzofuran-2-yl)methyl)malonate(4j)**

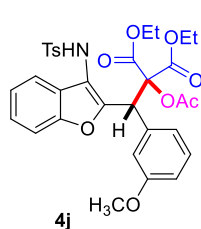

58.0mg, 93% yield; colorless oil; eluent (petroleum ether/ethyl acetate = 5:1).  $^1\text{H}$  NMR (400 MHz,  $\text{CDCl}_3$ )  $\delta$  7.96 (s, 1NH), 7.72 – 7.64 (m, 3H), 7.30 – 7.27 (m, 1H), 7.21 (pt,  $J$  = 7.5, 3.6 Hz, 4H), 7.05 (t,  $J$  = 8.0 Hz, 1H), 6.77 – 6.72 (m, 1H), 6.69 (t,  $J$  = 2.1 Hz, 1H), 6.45 – 6.40 (m, 1H), 4.81 (s, 1H), 4.12 – 4.03 (m, 3H), 3.93 (dq,  $J$  = 10.7, 7.1 Hz, 1H), 3.79 (s, 3H), 2.42 (s, 3H), 1.91 (s, 3H), 1.06 (t,  $J$  = 7.1 Hz, 3H), 0.91 (t,  $J$  = 7.2 Hz, 3H).  $^{13}\text{C}$  NMR (100 MHz,  $\text{CDCl}_3$ )  $\delta$  166.2, 166.0, 159.0, 153.6, 147.1, 143.8, 136.8, 134.9, 129.8, 128.6, 127.5, 125.8, 124.9, 123.3, 122.8, 121.4, 117.0, 116.3, 112.5, 110.8, 83.2, 63.2, 62.8, 55.2, 45.5, 21.6, 20.3, 13.6, 13.3. HRMS (ESI-TOF)  $m/z$ :  $[\text{M} + \text{Na}]^+$  Calcd for  $\text{C}_{32}\text{H}_{33}\text{NNaO}_{10}\text{S}^+$  646.1717 ; Found 646.1712.

**Diethyl(R)-2-acetoxy-2-((2-bromophenyl)(3-((4-methylphenyl)sulfonamido)benzofuran-2-yl)methyl)malonate (4k)**

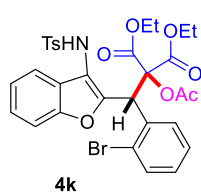

61.1 mg, 91% yield; white powder; eluent (petroleum ether/ethyl acetate = 5:1).  $^1\text{H}$  NMR (400 MHz,  $\text{CDCl}_3$ )  $\delta$  8.13 (dd,  $J$  = 8.0, 1.6 Hz, 1H), 7.84 (s, 1NH), 7.72 (d,  $J$  = 8.1 Hz, 2H), 7.61 – 7.57 (m, 1H), 7.41 (dd,  $J$  = 8.1, 1.3 Hz, 1H), 7.36 – 7.29 (m, 2H), 7.22 (ddd,  $J$  = 8.3, 7.2, 1.3 Hz, 1H), 7.17 (d,  $J$  = 8.0 Hz, 2H), 7.15 – 7.07 (m, 2H), 5.92 (s, 1H), 4.05 (dt,  $J$  = 17.5, 7.3, 3.6 Hz, 4H), 2.38 (s, 3H), 2.05 (s, 3H), 1.05 (t,  $J$  = 7.1 Hz, 3H), 0.98 (t,  $J$  = 7.2 Hz, 3H).  $^{13}\text{C}$  NMR (100 MHz,  $\text{CDCl}_3$ )  $\delta$  168.5, 153.6, 144.5, 143.6, 137.6, 133.5, 132.7, 132.3, 129.7, 129.4, 127.5, 127.2, 125.8, 125.0, 124.9, 123.1, 121.8, 117.4,

110.8, 83.6, 63.3, 62.9, 44.2, 21.6, 20.4, 13.5, 13.5. HRMS (ESI-TOF)  $m/z$ :  $[M + Na]^+$  Calcd for  $C_{31}H_{30}BrNNaO_9S^+$  694.0717 ; Found 694.0714.

**Diethyl(R)-2-acetoxy-2-((3-((4-methylphenyl)sulfonamido)benzofuran-2-yl)(o-tolyl)methyl)malonate (4l)**

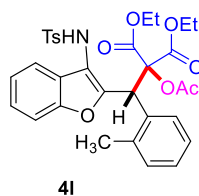

55.2 mg, 91% yield; white powder; eluent (petroleum ether/ethyl acetate = 5:1).  $^1H$  NMR (400 MHz,  $CDCl_3$ )  $\delta$  7.99 (d,  $J$  = 7.9 Hz, 1H), 7.95 (s, 1NH), 7.73 (d,  $J$  = 8.0 Hz, 2H), 7.26 – 7.17 (m, 5H), 7.13 (dt,  $J$  = 12.8, 7.7 Hz, 2H), 7.04 – 6.96 (m, 2H), 5.59 (s, 1H), 4.10 – 3.90 (m, 4H), 2.39 (s, 3H), 1.96 (s, 3H), 1.93 (s, 3H), 0.98 (t,  $J$  = 7.1 Hz, 3H), 0.93 (t,  $J$  = 7.1 Hz, 3H).  $^{13}C$  NMR (100 MHz,  $CDCl_3$ )  $\delta$  168.7, 166.7, 165.9, 153.5, 146.3, 143.7, 137.9, 137.3, 132.3, 130.9, 130.3, 129.7, 127.9, 127.5, 125.8, 125.2, 124.8, 123.0, 121.1, 116.6, 110.9, 83.8, 63.2, 62.8, 40.6, 21.6, 20.3, 19.3, 13.5, 13.4. HRMS (ESI-TOF)  $m/z$ :  $[M + Na]^+$  Calcd for  $C_{32}H_{33}NNaO_9S^+$  630.1768 ; Found 630.1760.

**Diethyl(R)-2-acetoxy-2-((2-methoxyphenyl)(3-((4-methylphenyl)sulfonamido)benzofuran-2-yl)methyl)malonate (4m)**

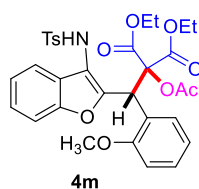

56.1 mg, 90% yield; colorless oil; eluent (petroleum ether/ethyl acetate = 3:1).  $^1H$  NMR (400 MHz,  $CDCl_3$ )  $\delta$  7.85 (dd,  $J$  = 7.8, 1.7 Hz, 1H), 7.61 (d,  $J$  = 8.0 Hz, 2H), 7.51 (s, 1NH), 7.43 (d,  $J$  = 7.8 Hz, 1H), 7.33 (d,  $J$  = 8.3 Hz, 1H), 7.21 (td,  $J$  = 7.7, 3.6 Hz, 2H), 7.11 (d,  $J$  = 7.5 Hz, 1H), 7.07 (d,  $J$  = 8.2 Hz, 2H), 6.92 (t,  $J$  = 7.6 Hz, 1H), 6.72 (d,  $J$  = 8.2 Hz, 1H), 5.81 (s, 1H), 4.06 – 3.94 (m, 4H), 3.71 (s, 3H), 2.32 (s, 3H), 2.06 (s, 3H), 1.01 (t,  $J$  = 7.1 Hz, 3H), 0.91 (t,  $J$  = 7.1 Hz, 3H).  $^{13}C$  NMR (100 MHz,  $CDCl_3$ )  $\delta$  168.8, 166.3, 165.3, 156.7, 153.6, 147.5, 137.1, 131.4, 129.3, 129.1, 127.3, 125.0, 124.7, 123.0, 122.3, 121.2, 120.2, 110.9, 109.9, 83.6, 62.8, 62.4, 55.4, 37.1, 21.6, 20.5, 13.5, 13.4. HRMS (ESI-TOF)  $m/z$ :  $[M + Na]^+$  Calcd for  $C_{32}H_{33}NNaO_{10}S^+$  646.1717 ; Found 646.1720.

**Diethyl (R)-2-acetoxy-2-((3-(methylsulfonamido)benzofuran-2-yl)(phenyl)methyl)malonate (4n)**

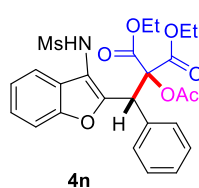

47.6mg, 92% yield; colorless oil; eluent (petroleum ether/ethyl acetate = 5:1).  $^1H$  NMR (400 MHz,  $CDCl_3$ )  $\delta$  7.77 – 7.72 (m, 1H), 7.66 – 7.61 (m, 2H), 7.50 (s, 1NH), 7.39 – 7.29 (m, 4H), 7.28 (d,  $J$  = 5.4 Hz, 1H), 7.24 (d,  $J$  = 1.7 Hz, 1H), 5.42 (s, 1H), 4.16 – 3.96 (m, 4H), 3.04 (s, 3H), 2.01 (s, 3H), 1.07 (t,  $J$  = 7.1 Hz, 3H), 0.95 (t,  $J$  = 7.1 Hz, 3H).  $^{13}C$  NMR (100 MHz,  $CDCl_3$ )  $\delta$  169.0, 166.1, 165.8, 153.6, 148.1, 133.8, 130.5, 128.5, 128.3, 125.5, 125.2, 123.5, 120.7, 116.1, 111.1, 83.4, 63.2, 62.9, 46.1, 39.7, 20.4, 13.7, 13.4. HRMS (ESI-TOF)  $m/z$ :  $[M + Na]^+$  Calcd for  $C_{25}H_{27}NNaO_9S^+$  540.1299 ; Found 540.1299.

**Diethyl (R)-2-acetoxy-2-(phenyl(3-(phenylsulfonamido)benzofuran-2-yl)methyl)malonate (4o)**

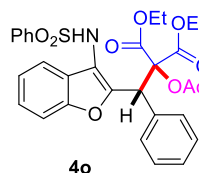

55.6 mg, 96% yield; colorless oil; eluent (petroleum ether/ethyl acetate = 4:1).  $^1H$  NMR (400 MHz,  $CDCl_3$ )  $\delta$  8.05 (s, 1NH), 7.85 – 7.80 (m, 2H), 7.70 (dd,  $J$  = 7.6, 1.6 Hz, 1H), 7.63 – 7.56 (m, 1H), 7.43 (t,  $J$  = 7.9 Hz, 2H), 7.31 – 7.27 (m, 1H), 7.25 – 7.12 (m, 5H), 6.90 – 6.85 (m, 2H), 4.84 (s, 1H), 4.13 – 4.02 (m, 3H), 3.92 (dq,  $J$  = 10.7, 7.1 Hz, 1H), 1.87 (s, 3H), 1.05 (t,  $J$  = 7.1 Hz, 3H), 0.90 (t,  $J$  = 7.2 Hz, 3H).  $^{13}C$  NMR (101 MHz,  $CDCl_3$ )  $\delta$  168.8, 166.2, 147.3, 139.9, 133.5, 132.8, 130.4, 129.3, 127.9, 127.5, 125.7, 125.0, 123.3, 121.3, 116.0, 110.8, 83.1, 63.2, 62.9, 45.7, 20.2, 13.6, 13.3. HRMS (ESI-TOF)  $m/z$ :  $[M + Na]^+$  Calcd for  $C_{30}H_{29}NNaO_9S^+$  602.1455; Found 602.1457.

**Diethyl(R)-2-acetoxy-2-(furan-2-yl(3-((4-methylphenyl)sulfonamido)benzofuran-2-yl)methyl)malonate (4p)**

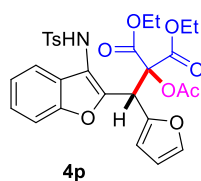

38.5mg, 66% yield; light yellow oil; eluent (petroleum ether/ethyl acetate = 3:1).  $^1\text{H}$  NMR (400 MHz,  $\text{CDCl}_3$ )  $\delta$  7.87 – 7.81 (m, 1H), 7.76 (s, 1NH), 7.63 – 7.54 (m, 2H), 7.35 – 7.26 (m, 3H), 7.19 (dd,  $J$  = 1.9, 0.9 Hz, 1H), 7.09 (d,  $J$  = 8.0 Hz, 2H), 6.24 (dd,  $J$  = 3.3, 1.8 Hz, 1H), 6.20 (d,  $J$  = 3.3 Hz, 1H), 4.78 (s, 1H), 4.22 – 4.07 (m, 3H), 3.92 (dq,  $J$  = 10.7, 7.2 Hz, 1H), 2.34 (s, 3H), 2.01 (s, 3H), 1.16 (t,  $J$  = 7.1 Hz, 3H), 0.91 (t,  $J$  = 7.2 Hz, 3H).  $^{13}\text{C}$  NMR (101 MHz,  $\text{CDCl}_3$ )  $\delta$  169.0, 165.9, 153.6, 146.8, 145.2, 143.4, 141.8, 136.0, 129.6, 127.2, 125.9, 125.2, 123.5, 121.5, 117.0, 110.8, 110.6, 110.5, 82.2, 63.1, 62.9, 39.5, 21.6, 20.4, 13.7, 13.3. HRMS (ESI-TOF)  $m/z$ :  $[\text{M} + \text{Na}]^+$  Calcd for  $\text{C}_{29}\text{H}_{29}\text{NNaO}_{10}\text{S}^+$  606.1404 ; Found 606.1407.

**Diethyl(R)-2-acetoxy-2-((3-((4-methylphenyl)sulfonamido)benzofuran-2-yl)(thiophen-2-yl)methyl)malonate (4q)**

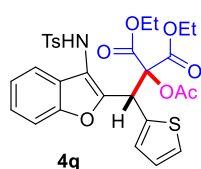

49.7 mg, 83% yield; light yellow powder; eluent (petroleum ether/ethyl acetate = 3:1).  $^1\text{H}$  NMR (400 MHz,  $\text{CDCl}_3$ )  $\delta$  7.77 (s, 1NH), 7.73 – 7.68 (m, 1H), 7.65 (d,  $J$  = 8.0 Hz, 2H), 7.34 (d,  $J$  = 8.0 Hz, 1H), 7.26 – 7.18 (m, 3H), 7.16 (d,  $J$  = 8.0 Hz, 2H), 6.80 (dd,  $J$  = 5.1, 3.6 Hz, 1H), 6.48 (d,  $J$  = 3.5 Hz, 1H), 5.12 (s, 1H), 4.11 (qd,  $J$  = 7.3, 4.5 Hz, 3H), 4.00 (dd,  $J$  = 10.7, 7.1 Hz, 1H), 2.39 (s, 3H), 2.03 (s, 3H), 1.13 (t,  $J$  = 7.1 Hz, 3H), 0.98 (t,  $J$  = 7.1 Hz, 3H).  $^{13}\text{C}$  NMR (101 MHz,  $\text{CDCl}_3$ )  $\delta$  169.0, 165.8, 165.5, 153.5, 146.3, 143.7, 136.5, 134.0, 129.8, 129.1, 127.3, 126.5, 125.8, 125.4, 125.1, 123.4, 121.3, 116.2, 110.8, 83.3, 63.2, 62.9, 41.4, 21.6, 20.4, 13.7, 13.4. HRMS (ESI-TOF)  $m/z$ :  $[\text{M} + \text{Na}]^+$  Calcd for  $\text{C}_{29}\text{H}_{29}\text{NNaO}_9\text{S}_2^+$  622.1176; Found 622.1172.

**Diethyl(R)-2-acetoxy-2-((3-((4-methylphenyl)sulfonamido)benzofuran-2-yl)(pyridin-3-yl)methyl)malonate (4r)**

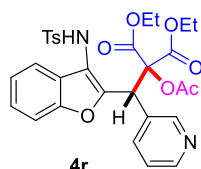

33.8 mg, 57% yield; white powder; eluent (petroleum ether/ethyl acetate = 5:1).  $^1\text{H}$  NMR (400 MHz,  $\text{CDCl}_3$ )  $\delta$  8.48 (dd,  $J$  = 4.9, 1.6 Hz, 1H), 7.93 (d,  $J$  = 2.3 Hz, 1H), 7.90 (s, 1H), 7.70 (dt,  $J$  = 8.1, 1.8 Hz, 1H), 7.64 (dd,  $J$  = 8.5, 2.1 Hz, 3H), 7.30 (d,  $J$  = 8.1 Hz, 1H), 7.26 – 7.17 (m, 5H), 4.89 (s, 1H), 4.08 (qd,  $J$  = 7.2, 3.2 Hz, 3H), 3.93 (dq,  $J$  = 10.7, 7.2 Hz, 1H), 2.44 (s, 3H), 1.92 (s, 3H), 1.08 (t,  $J$  = 7.1 Hz, 3H), 0.91 (t,  $J$  = 7.1 Hz, 3H).  $^{13}\text{C}$  NMR (100 MHz,  $\text{CDCl}_3$ )  $\delta$  168.8, 165.8, 153.6, 150.5, 148.6, 146.1, 144.2, 138.5, 136.5, 130.0, 129.8, 127.4, 125.3, 123.5, 123.0, 121.3, 116.9, 110.8, 82.9, 63.4, 63.1, 43.6, 21.6, 20.2, 13.7, 13.3. HRMS (ESI-TOF)  $m/z$ :  $[\text{M} + \text{H}]^+$  Calcd for  $\text{C}_{30}\text{H}_{31}\text{N}_2\text{O}_9\text{S}^+$  595.1745; Found 595.1742.

**Diethyl(R)-2-acetoxy-2-((3-((4-methylphenyl)sulfonamido)benzofuran-2-yl)(naphthalen-2-yl)methyl)malonate (4s)**

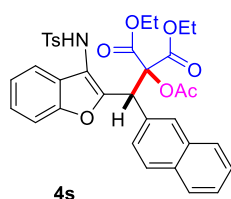

53.3 mg, 83% yield; whiter powder; eluent (petroleum ether/ethyl acetate = 5:1).  $^1\text{H}$  NMR (400 MHz,  $\text{CDCl}_3$ )  $\delta$  8.03 (s, 1NH), 7.79 – 7.64 (m, 6H), 7.49 – 7.43 (m, 2H), 7.33 – 7.16 (m, 7H), 5.07 (s, 1H), 4.12 (dq,  $J$  = 10.6, 7.2 Hz, 1H), 4.03 (q,  $J$  = 7.2 Hz, 2H), 3.94 (dq,  $J$  = 10.6, 7.2 Hz, 1H), 2.35 (s, 3H), 1.85 (s, 3H), 1.01 (t,  $J$  = 7.1 Hz, 3H), 0.91 (t,  $J$  = 7.2 Hz, 3H).  $^{13}\text{C}$  NMR (100 MHz,  $\text{CDCl}_3$ )  $\delta$  168.9, 166.2, 166.1, 153.6, 147.1, 143.6, 136.9, 132.7, 132.6, 131.2, 129.8,

129.6, 128.1, 127.9, 127.5, 127.5, 127.3, 126.3, 126.0, 125.7, 125.0, 123.3, 121.4, 116.4, 110.8, 83.4, 63.3, 62.9, 45.9, 21.6, 20.3, 13.6, 13.3. HRMS (ESI-TOF)  $m/z$ :  $[M + Na]^+$  Calcd for  $C_{35}H_{33}NNaO_9S^+$  666.1768; Found 666.1769.

**1-methyl-3-((R)-(3-((4-methylphenyl)sulfonamido)benzofuran-2-yl)(phenyl)methyl)-2-oxoindolin-3-yl acetate (5a)**

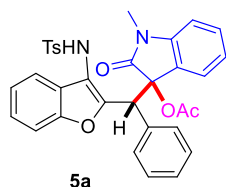

32.5mg, 56% yield; light yellow powder; eluent (dichloromethane/petroleum ether = 6:1).  $^1H$  NMR (400 MHz,  $CDCl_3$ )  $\delta$  7.79 – 7.71 (m, 1H), 7.45 (d,  $J$  = 7.9 Hz, 2H), 7.30 (t,  $J$  = 7.8 Hz, 2H), 7.26 – 7.17 (m, 6H), 7.10 – 7.03 (m, 1H), 6.93 (t,  $J$  = 7.6 Hz, 1H), 6.90 – 6.82 (m, 3H), 6.57 (d,  $J$  = 7.8 Hz, 1H), 6.45 (d,  $J$  = 7.4 Hz, 1H), 4.33 (s, 1H), 2.65 (s, 3H), 2.21 (s, 3H), 2.00 (s, 3H).  $^{13}C$  NMR (100 MHz,  $CDCl_3$ )  $\delta$  168.2, 153.5, 148.0, 144.1, 143.4, 135.9, 132.9, 130.8, 130.2, 129.5, 127.7, 127.4, 127.0, 125.0, 124.5, 123.5, 122.3, 121.1, 116.6, 110.8, 108.0, 80.8, 47.0, 26.0, 21.6, 20.6. HRMS (ESI-TOF)  $m/z$ :  $[M + Na]^+$  Calcd for  $C_{33}H_{28}N_2NaO_6S^+$  603.1560; Found 603.1562.

**1-methyl-3-((S)-(3-((4-methylphenyl)sulfonamido)benzofuran-2-yl)(phenyl)methyl)-2-oxoindolin-3-yl acetate (5a')**

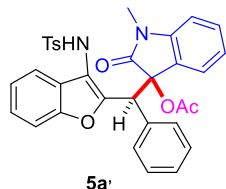

16.2 mg, 28% yield; light yellow powder; eluent (dichloromethane/petroleum ether = 6:1).  $^1H$  NMR (400 MHz,  $CDCl_3$ )  $\delta$  7.75 (d,  $J$  = 7.6 Hz, 1H), 7.59 (d,  $J$  = 7.9 Hz, 2H), 7.46 (d,  $J$  = 8.0 Hz, 1H), 7.36 – 7.27 (m, 3H), 7.11 (q,  $J$  = 8.1, 7.4 Hz, 4H), 6.98 (t,  $J$  = 7.6 Hz, 3H), 6.86 (d,  $J$  = 7.5 Hz, 1H), 6.65 (d,  $J$  = 7.7 Hz, 2H), 6.57 (d,  $J$  = 7.8 Hz, 1H), 4.21 (s, 1H), 2.78 (s, 3H), 2.33 (s, 3H), 2.07 (s, 3H).  $^{13}C$  NMR (100 MHz,  $CDCl_3$ )  $\delta$  173.0, 168.0, 153.5, 148.4, 143.9, 135.7, 131.1, 130.4, 130.3, 129.8, 127.9, 127.4, 127.3, 124.9, 124.6, 124.3, 123.4, 122.4, 121.0, 117.2, 111.3, 108.1, 82.8, 47.9, 25.9, 21.5, 20.8. HRMS (ESI-TOF)  $m/z$ :  $[M + Na]^+$  Calcd for  $C_{33}H_{28}N_2NaO_6S^+$  603.1560; Found 603.1562.

**2-methyl-4-((R)-(3-((4-methylphenyl)sulfonamido)benzofuran-2-yl)(phenyl)methyl)-1,3-dioxo-1,2,3,4-tetrahydroisoquinolin-4-yl acetate (5b)**

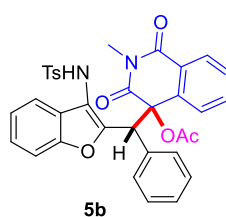

29.2 mg, 62% yield (1:1); colorless oil; eluent (dichloromethane/petroleum ether = 6:1).  $^1H$  NMR (400 MHz,  $CDCl_3$ )  $\delta$  8.22 (d,  $J$  = 7.8 Hz, 1H), 8.14 (d,  $J$  = 7.8 Hz, 1H), 7.98 – 7.91 (m, 1H), 7.68 (dd,  $J$  = 14.4, 7.8 Hz, 3H), 7.57 (t,  $J$  = 7.8 Hz, 1H), 7.53 (t,  $J$  = 7.8 Hz, 1H), 7.47 (d,  $J$  = 7.9 Hz, 2H), 7.43 (d,  $J$  = 7.8 Hz, 1H), 7.37 (q,  $J$  = 6.9, 5.4 Hz, 5H), 7.31 (dd,  $J$  = 11.9, 5.3 Hz, 5H), 7.21 (d,  $J$  = 7.8 Hz, 4H), 7.13 (t,  $J$  = 7.6 Hz, 2H), 7.03 (d,  $J$  = 7.7 Hz, 2H), 6.92 (d,  $J$  = 7.9 Hz, 2H), 6.62 (d,  $J$  = 7.9 Hz, 1H), 6.55 – 6.46 (m, 3H), 6.27 (d,  $J$  = 7.8 Hz, 1H), 4.69 (s, 1H), 4.39 (s, 1H), 2.92 (s, 3H), 2.80 (s, 3H), 2.41 (s, 3H), 2.26 (d,  $J$  = 4.9 Hz, 6H), 2.18 (s, 3H).  $^{13}C$  NMR (100 MHz,  $CDCl_3$ )  $\delta$  168.8, 153.7, 153.3, 148.1, 146.1, 143.7, 135.5, 135.4, 133.0, 132.5, 132.2, 130.8, 130.3, 130.1, 129.9, 129.5, 129.5, 129.1, 128.9, 128.2, 128.1, 128.0, 127.9, 127.6, 127.4, 127.0, 126.6, 126.1, 125.8, 125.7, 125.4, 125.1, 124.8, 124.7, 123.9, 123.7, 121.3, 120.6, 118.4, 116.7, 111.4, 111.3, 81.9, 80.0, 52.4, 51.2, 26.8, 26.6, 21.6, 21.5, 21.0, 20.8. HRMS (ESI-TOF)  $m/z$ :  $[M + Na]^+$  Calcd for  $C_{34}H_{28}N_2NaO_7S^+$  631.1509; Found 631.1505.

**Di-tert-butyl(S)-2-acetoxy-2-((3-((4-methylphenyl)sulfonamido)benzofuran-2-yl)(phenyl)methyl)**

**malonate(5c)**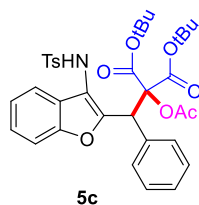

HRMS (ESI-TOF) m/z: [M + Na]<sup>+</sup> Calcd for C<sub>35</sub>H<sub>39</sub>NNaO<sub>9</sub>S<sup>+</sup> 672.2238; Found 672.2237.

**Ethyl-2-acetoxy-2-((R)-3-((4-methylphenyl)sulfonamido)benzofuran-2-yl)(phenyl)methyl-3-oxobutanoate (5d)**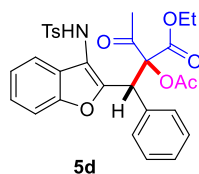

27.6 mg, 49% yield; white powder; eluent (dichloromethane/petroleum ether = 6:1). <sup>1</sup>H NMR (400 MHz, CDCl<sub>3</sub>) δ 7.66 – 7.62 (m, 2H), 7.49 – 7.45 (m, 1H), 7.35 (s, 1NH), 7.31 (dt, *J* = 8.3, 0.9 Hz, 1H), 7.24 – 7.12 (m, 7H), 7.10 – 7.06 (m, 2H), 4.85 (s, 1H), 3.96 (dd, *J* = 7.2, 1.4 Hz, 2H), 2.40 (s, 3H), 2.14 (s, 3H), 2.10 (s, 3H), 0.97 (t, *J* = 7.1 Hz, 3H). <sup>13</sup>C NMR (100 MHz, CDCl<sub>3</sub>) δ 199.0, 169.4, 165.7, 153.5, 148.0, 143.7, 136.7, 133.6, 130.4, 129.8, 128.0, 127.5, 125.5, 124.9, 123.3, 120.8, 116.1, 110.9, 88.9, 62.7, 45.2, 26.6, 21.6, 20.5, 13.5. HRMS (ESI-TOF) m/z: [M + Na]<sup>+</sup> Calcd for C<sub>30</sub>H<sub>29</sub>NNaO<sub>8</sub>S<sup>+</sup> 586.1506; Found 586.1511.

**Ethyl-2-acetoxy-2-((S)-3-((4-methylphenyl)sulfonamido)benzofuran-2-yl)(phenyl)methyl-3-oxobutanoate (5d')**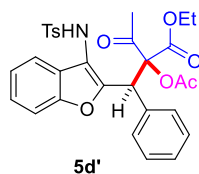

27.6 mg, 49% yield; white powder; eluent (dichloromethane/petroleum ether = 6:1). <sup>1</sup>H NMR (400 MHz, CDCl<sub>3</sub>) δ 7.95 (s, 1NH), 7.83 – 7.76 (m, 1H), 7.69 – 7.63 (m, 2H), 7.28 (d, *J* = 1.6 Hz, 1H), 7.25 – 7.17 (m, 5H), 7.14 (dd, *J* = 8.2, 6.4 Hz, 2H), 6.88 (dt, *J* = 7.1, 1.4 Hz, 2H), 4.66 (s, 1H), 4.13 – 3.96 (m, 2H), 2.43 (s, 3H), 2.05 (s, 3H), 1.96 (s, 3H), 1.00 (t, *J* = 7.1 Hz, 3H). <sup>13</sup>C NMR (100 MHz, CDCl<sub>3</sub>) δ 201.5, 168.5, 153.6, 147.0, 143.5, 136.8, 133.4, 130.6, 129.9, 128.0, 127.9, 127.4, 125.9, 124.9, 123.4, 121.6, 116.0, 110.6, 88.4, 63.1, 45.2, 26.7, 21.6, 20.4, 13.4. HRMS (ESI-TOF) m/z: [M + Na]<sup>+</sup> Calcd for C<sub>30</sub>H<sub>29</sub>NNaO<sub>8</sub>S<sup>+</sup> 586.1506; Found 586.1513.

**Tert-butyl 2-acetoxy-2-((R)-3-((4-methylphenyl)sulfonamido)benzofuran-2-yl)(phenyl)methyl-3-oxobutanoate (5e)**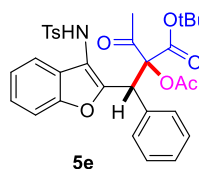

33.6 mg, 57% yield; white powder; eluent (dichloromethane/petroleum ether = 6:1). <sup>1</sup>H NMR (400 MHz, CDCl<sub>3</sub>) δ 7.71 (d, *J* = 8.3 Hz, 2H), 7.64 (s, 1NH), 7.57 (dd, *J* = 7.5, 1.6 Hz, 1H), 7.28 – 7.25 (m, 1H), 7.23 – 7.13 (m, 7H), 6.99 – 6.94 (m, 2H), 4.80 (s, 1H), 2.44 (s, 3H), 2.12 (d, *J* = 2.9 Hz, 6H), 1.13 (s, 9H). <sup>13</sup>C NMR (100 MHz, CDCl<sub>3</sub>) δ 199.3, 169.3, 163.7, 147.7, 143.6, 137.1, 134.3, 130.3, 129.8, 128.0, 127.8, 127.6, 124.8, 123.2, 121.1, 115.8, 110.7, 89.6, 84.3, 44.4, 27.1, 25.8, 21.6, 20.4. HRMS (ESI-TOF) m/z: [M + Na]<sup>+</sup> Calcd for C<sub>32</sub>H<sub>33</sub>NNaO<sub>8</sub>S<sup>+</sup> 614.1819; Found 614.1822.

**Tert-butyl 2-acetoxy-2-((S)-3-((4-methylphenyl)sulfonamido)benzofuran-2-yl)(phenyl)methyl-3-oxobutanoate (5e')**

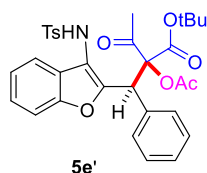

16.6 mg, 28% yield; white powder; eluent (dichloromethane/petroleum ether = 6:1).  $^1\text{H}$  NMR (400 MHz,  $\text{CDCl}_3$ )  $\delta$  8.09 (s, 1NH), 7.87 – 7.81 (m, 1H), 7.69 – 7.63 (m, 2H), 7.30 – 7.26 (m, 1H), 7.24 – 7.20 (m, 3H), 7.18 (d,  $J$  = 7.1 Hz, 2H), 7.15 – 7.10 (m, 2H), 6.86 – 6.80 (m, 2H), 4.60 (s, 1H), 2.43 (s, 3H), 2.02 (s, 3H), 1.96 (s, 3H), 1.25 (s, 9H).  $^{13}\text{C}$  NMR (100 MHz,  $\text{CDCl}_3$ )  $\delta$  201.8, 168.3, 165.5, 153.5, 147.0, 143.5, 136.8, 133.7, 130.6, 129.9, 127.9, 127.7, 127.5, 124.8, 123.3, 121.7, 116.0, 110.7, 89.0, 84.7, 44.9, 27.4, 26.6, 21.6, 20.4. HRMS (ESI-TOF)  $m/z$ :  $[\text{M} + \text{Na}]^+$  Calcd for  $\text{C}_{32}\text{H}_{33}\text{NNaO}_8\text{S}^+$  614.1819; Found 614.1816.

**Benzyl 2-acetoxy-2-((R)-(3-((4-methylphenyl)sulfonamido)benzofuran-2-yl)(phenyl)methyl)-3-oxobutanoate (5f)**

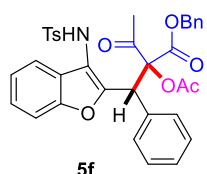

31.3 mg, 50% yield; light yellow powder; eluent (dichloromethane/petroleum ether = 6:1).  $^1\text{H}$  NMR (400 MHz,  $\text{CDCl}_3$ )  $\delta$  7.56 (d,  $J$  = 7.8 Hz, 2H), 7.46 (d,  $J$  = 7.7 Hz, 1H), 7.37 (s, 1NH), 7.30 (d,  $J$  = 6.6 Hz, 3H), 7.07 (ddt,  $J$  = 46.8, 18.3, 7.5 Hz, 12H), 4.85 (s, 2H), 4.81 (s, 1H), 2.33 (s, 3H), 2.05 (s, 6H).  $^{13}\text{C}$  NMR (100 MHz,  $\text{CDCl}_3$ )  $\delta$  199.0, 169.5, 165.5, 147.9, 143.7, 136.6, 134.1, 133.4, 130.3, 129.8, 128.7, 128.6, 128.5, 128.0, 127.4, 125.0, 123.3, 120.8, 116.1, 110.9, 89.1, 68.4, 45.2, 26.6, 21.6, 20.4. HRMS (ESI-TOF)  $m/z$ :  $[\text{M} + \text{Na}]^+$  Calcd for  $\text{C}_{35}\text{H}_{31}\text{NNaO}_8\text{S}^+$  648.1663; Found 648.1667.

**Benzyl 2-acetoxy-2-((S)-(3-((4-methylphenyl)sulfonamido)benzofuran-2-yl)(phenyl)methyl)-3-oxobutanoate (5f')**

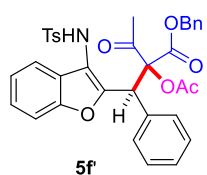

23.8 mg, 38% yield; colorless oil; eluent (dichloromethane/petroleum ether = 6:1).  $^1\text{H}$  NMR (400 MHz,  $\text{CDCl}_3$ )  $\delta$  7.74 – 7.68 (m, 2H), 7.65 (d,  $J$  = 8.0 Hz, 2H), 7.33 – 7.26 (m, 4H), 7.24 – 7.12 (m, 7H), 7.08 – 7.02 (m, 2H), 6.97 – 6.91 (m, 2H), 5.03 – 4.93 (m, 2H), 4.72 (s, 1H), 2.42 (s, 3H), 2.06 (s, 3H), 1.91 (s, 3H).  $^{13}\text{C}$  NMR (100 MHz,  $\text{CDCl}_3$ )  $\delta$  201.1, 168.7, 167.0, 153.6, 147.4, 143.5, 136.8, 134.1, 133.3, 130.6, 129.9, 128.7, 128.6, 128.4, 128.0, 128.0, 127.4, 125.8, 124.9, 123.4, 121.5, 116.0, 110.7, 88.4, 68.7, 45.3, 26.9, 21.6, 20.5. HRMS (ESI-TOF)  $m/z$ :  $[\text{M} + \text{Na}]^+$  Calcd for  $\text{C}_{35}\text{H}_{31}\text{NNaO}_8\text{S}^+$  648.1663; Found 648.1668.

**Methyl 2-acetoxy-2-((R)-(3-((4-methylphenyl)sulfonamido)benzofuran-2-yl)(phenyl)methyl)-3-oxohexanoate (5g)**

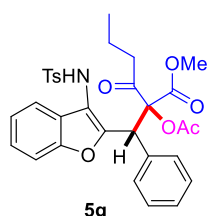

30.0 mg, 52% yield; colorless oil; eluent (dichloromethane/petroleum ether = 6:1).  $^1\text{H}$  NMR (400 MHz,  $\text{CDCl}_3$ )  $\delta$  7.65 (d,  $J$  = 7.9 Hz, 2H), 7.56 (d,  $J$  = 7.7 Hz, 1H), 7.49 (s, 1NH), 7.36 (d,  $J$  = 8.2 Hz, 1H), 7.29 (d,  $J$  = 7.1 Hz, 1H), 7.20 (dd,  $J$  = 23.5, 8.1 Hz, 6H), 7.10 (d,  $J$  = 7.3 Hz, 2H), 4.88 (s, 1H), 3.54 (s, 3H), 2.53 – 2.31 (m, 5H), 2.10 (s, 3H), 1.53 (q,  $J$  = 7.4 Hz, 2H), 0.83 (t,  $J$  = 7.5 Hz, 3H).  $^{13}\text{C}$  NMR (100 MHz,  $\text{CDCl}_3$ )  $\delta$  201.5, 169.4, 166.6, 153.5, 147.9, 143.7, 136.5, 133.6, 130.3, 129.8, 127.9, 127.5, 125.5, 124.9, 123.3, 120.9, 116.2, 110.9, 88.7, 53.1, 45.5, 40.9, 21.6, 20.5, 17.1, 13.4. HRMS (ESI-TOF)  $m/z$ :  $[\text{M} + \text{Na}]^+$  Calcd for  $\text{C}_{31}\text{H}_{31}\text{NNaO}_8\text{S}^+$  600.1663; Found 600.1660.

**Methyl 2-acetoxy-2-((S)-(3-((4-methylphenyl)sulfonamido)benzofuran-2-yl)(phenyl)methyl)-3-oxohexanoate (5g')**

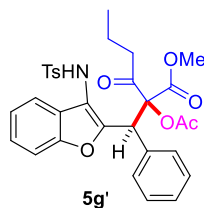

23.1 mg, 40% yield; colorless oil; eluent (dichloromethane/petroleum ether = 6:1).  $^1\text{H}$  NMR (400 MHz,  $\text{CDCl}_3$ )  $\delta$  8.03 (s, 1NH), 7.86 – 7.78 (m, 1H), 7.66 (d,  $J$  = 7.9 Hz, 2H), 7.31–7.27 (m, 1H), 7.25 – 7.16 (m, 5H), 7.13 (t,  $J$  = 7.5 Hz, 2H), 6.85 (d,  $J$  = 7.5 Hz, 2H), 4.63 (s, 1H), 3.58 (s, 3H), 2.43 (s, 4H), 2.11 (s, 4H), 1.31 (dd,  $J$  = 14.1, 7.1 Hz, 1H), 1.18 (dq,  $J$  = 14.1, 7.2 Hz, 1H), 0.57 (t,  $J$  = 7.4 Hz, 3H).  $^{13}\text{C}$  NMR (100 MHz,  $\text{CDCl}_3$ )  $\delta$  203.6, 168.4, 168.1, 153.5, 147.0, 143.5, 136.9, 133.3, 130.7, 129.9, 127.9, 127.9, 127.4, 125.9, 124.9, 123.3, 121.7, 116.0, 110.5, 88.4, 53.5, 45.3, 40.9, 21.6, 20.6, 16.0, 13.0. HRMS (ESI-TOF)  $m/z$ :  $[\text{M} + \text{Na}]^+$  Calcd for  $\text{C}_{31}\text{H}_{31}\text{NNaO}_8\text{S}^+$  600.1663; Found 600.1667.

**Ethyl (3R)-2-acetoxy-2-benzoyl-3-(3-((4-methylphenyl)sulfonamido)benzofura-2-yl)-3-phenylpropanoate (5h)**

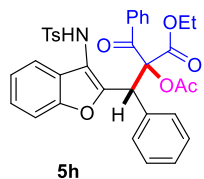

23.1 mg, 37% yield; colorless oil; eluent (dichloromethane/petroleum ether = 6:1).  $^1\text{H}$  NMR (400 MHz,  $\text{CDCl}_3$ )  $\delta$  8.17 (s, 1NH), 8.00 – 7.94 (m, 2H), 7.79 – 7.72 (m, 3H), 7.51 – 7.45 (m, 1H), 7.35 (t,  $J$  = 7.7 Hz, 2H), 7.26 – 7.13 (m, 8H), 7.02 – 6.96 (m, 2H), 5.01 (s, 1H), 3.76 (qd,  $J$  = 7.1, 4.9 Hz, 2H), 2.46 (s, 3H), 2.07 (s, 3H), 0.83 (t,  $J$  = 7.1 Hz, 3H).  $^{13}\text{C}$  NMR (100 MHz,  $\text{CDCl}_3$ )  $\delta$  190.3, 168.5, 153.5, 147.1, 143.5, 137.2, 134.2, 133.8, 133.7, 130.4, 129.8, 128.7, 128.2, 128.0, 127.8, 127.6, 125.9, 124.8, 123.3, 121.6, 116.1, 110.5, 89.2, 62.8, 45.3, 21.6, 20.7, 13.4. HRMS (ESI-TOF)  $m/z$ :  $[\text{M} + \text{Na}]^+$  Calcd for  $\text{C}_{35}\text{H}_{31}\text{NNaO}_8\text{S}^+$  648.1663; Found 648.1665.

**Ethyl (3S)-2-acetoxy-2-benzoyl-3-(3-((4-methylphenyl)sulfonamido)benzofuran-2-yl)-3-phenylpropanoate (4ai')**

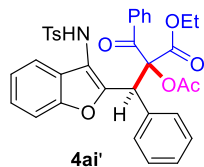

18.2mg, 29% yield; colorless oil; eluent (dichloromethane/petroleum ether = 6:1).  $^1\text{H}$  NMR (400 MHz,  $\text{CDCl}_3$ )  $\delta$  8.54 (s, 1NH), 7.98 – 7.92 (m, 1H), 7.89 – 7.80 (m, 2H), 7.71 (d,  $J$  = 8.1 Hz, 2H), 7.55 – 7.48 (m, 1H), 7.37 (t,  $J$  = 7.7 Hz, 2H), 7.29 (dt,  $J$  = 8.2, 2.9 Hz, 1H), 7.26 – 7.16 (m, 5H), 7.13 (dd,  $J$  = 8.0, 6.5 Hz, 2H), 6.88 – 6.80 (m, 2H), 5.10 (s, 1H), 3.96 (dq,  $J$  = 10.6, 7.1 Hz, 1H), 3.61 – 3.49 (m, 1H), 2.44 (s, 3H), 1.40 (s, 3H), 0.45 (t,  $J$  = 7.1 Hz, 3H).  $^{13}\text{C}$  NMR (100 MHz,  $\text{CDCl}_3$ )  $\delta$  192.3, 168.8, 146.6, 143.5, 136.6, 133.9, 133.8, 133.6, 131.0, 129.9, 128.8, 128.6, 127.6, 127.5, 125.0, 123.3, 121.9, 116.4, 110.7, 85.9, 63.6, 45.6, 21.6, 20.0, 12.6. HRMS (ESI-TOF)  $m/z$ :  $[\text{M} + \text{Na}]^+$  Calcd for  $\text{C}_{35}\text{H}_{31}\text{NNaO}_8\text{S}^+$  648.1663; Found 648.1667.

**(R)-2-((3-((4-methylphenyl)sulfonamido)benzofuran-2-yl)(phenyl)methyl)-1,3-dioxo-2,3-dihydro-1H-inden-2-yl acetate (5i)**

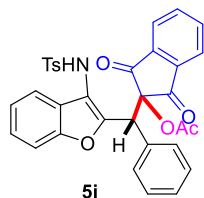

9.3 mg, 16% yield; light yellow oil; eluent (dichloromethane/petroleum ether = 6:1).  $^1\text{H}$  NMR (400 MHz,  $\text{CDCl}_3$ )  $\delta$  7.79 (dd,  $J$  = 7.5, 1.5 Hz, 1H), 7.63 – 7.56 (m, 2H), 7.52 – 7.46 (m, 3H), 7.29 (dt,  $J$  = 7.7, 1.1 Hz, 1H), 7.23 – 7.13 (m, 7H), 7.09 – 7.04 (m, 1H), 7.02 (d,  $J$  = 8.0 Hz, 2H), 6.39 (s, 1NH), 4.55 (s, 1H), 2.28 (s, 3H), 2.07 (s, 3H).  $^{13}\text{C}$  NMR (100 MHz,  $\text{CDCl}_3$ )  $\delta$  169.2, 148.1, 143.9, 140.3, 138.8, 135.8, 135.7, 135.3, 131.9, 130.4, 129.7, 128.0, 127.8, 127.3, 125.1, 124.7, 123.4, 123.0, 122.7, 120.2, 116.5, 111.1, 81.9, 46.0, 21.6, 19.8. HRMS (ESI-TOF)  $m/z$ :  $[\text{M} + \text{Na}]^+$  Calcd for  $\text{C}_{33}\text{H}_{25}\text{NNaO}_7\text{S}^+$  602.1244; Found 602.1244.

**(R)-1-((3-((4-methylphenyl)sulfonamido)benzofuran-2-yl)(phenyl)methyl)-2,6-dioxocyclohexyl**

**acetate (5k)**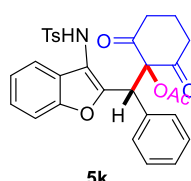**5k**

28.9 mg, 53% yield; light yellow powder; eluent (recrystallization from acetonitrile).  $^1\text{H}$  NMR (400 MHz,  $\text{CDCl}_3$ )  $\delta$  7.66 (dd,  $J = 7.4, 2.1$  Hz, 2H), 7.49 – 7.44 (m, 2H), 7.36 (dd,  $J = 8.0, 4.1$  Hz, 4H), 7.12 (ddd,  $J = 8.3, 7.2, 1.3$  Hz, 1H), 7.04 (d,  $J = 8.0$  Hz, 2H), 6.85 (td,  $J = 7.6, 1.7$  Hz, 1H), 6.70 (s, 1NH), 6.56 (d,  $J = 7.8$  Hz, 1H), 5.32 (s, 1H), 3.15 (ddd,  $J = 16.5, 13.0, 6.0$  Hz, 1H), 2.87 (dq,  $J = 16.6, 3.2$  Hz, 1H), 2.75 – 2.68 (m, 1H), 2.68 – 2.57 (m, 1H), 2.30 (s, 3H), 2.17 (s, 3H), 2.07 (qt,  $J = 5.8, 2.8$  Hz, 1H), 2.00 – 1.87 (m, 1H).  $^{13}\text{C}$  NMR (100 MHz,  $\text{CDCl}_3$ )  $\delta$  202.4, 199.8, 169.3, 153.6, 150.0, 144.1, 135.9, 132.4, 130.7, 129.6, 128.5, 128.5, 127.4, 124.8, 122.9, 118.4, 115.7, 111.7, 91.6, 45.5, 39.7, 39.2, 21.5, 20.3, 17.2. HRMS (ESI-TOF)  $m/z$ :  $[\text{M} + \text{Na}]^+$  Calcd for  $\text{C}_{30}\text{H}_{27}\text{NNaO}_7\text{S}^+$  568.1400; Found 568.1405.

**Diethyl(R)-2-((3-((4-methylphenyl)sulfonamido)benzofuran-2-yl)(phenyl)methyl)-2-(pivaloyloxy)malonate (6a)**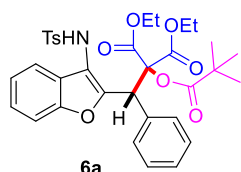**6a**

27.3 mg, 43% yield; colorless oil; eluent (petroleum ether/ethyl acetate = 6:1).  $^1\text{H}$  NMR (400 MHz,  $\text{CDCl}_3$ )  $\delta$  7.88 (s, 1NH), 7.71 (d,  $J = 7.3$  Hz, 1H), 7.66 (d,  $J = 7.9$  Hz, 2H), 7.28 (d,  $J = 7.9$  Hz, 1H), 7.24 – 7.16 (m, 5H), 7.13 (t,  $J = 7.4$  Hz, 2H), 6.94 (d,  $J = 7.4$  Hz, 2H), 4.84 (s, 1H), 4.04 (dq,  $J = 13.1, 7.5, 6.4$  Hz, 3H), 3.87 (dq,  $J = 14.3, 7.5$  Hz, 1H), 2.42 (s, 3H), 1.02 (s, 12H), 0.84 (t,  $J = 7.2$  Hz, 3H).  $^{13}\text{C}$  NMR (100 MHz,  $\text{CDCl}_3$ )  $\delta$  166.3, 166.1, 147.4, 143.5, 136.8, 133.6, 130.6, 129.8, 127.8, 127.7, 127.5, 124.9, 123.2, 121.3, 116.1, 110.8, 82.9, 63.0, 62.6, 46.0, 38.6, 26.5, 21.6, 13.6, 13.3. HRMS (ESI-TOF)  $m/z$ :  $[\text{M} + \text{Na}]^+$  Calcd for  $\text{C}_{34}\text{H}_{37}\text{NNaO}_9\text{S}^+$  658.2081; Found 658.2081.

**Diethyl(R)-2-(2-(benzo[d][1,3]dioxol-5-yl)acetoxy)-2-((3-((4-methylphenyl)sulfonamido)benzofuran-2-yl)(phenyl)methyl)malonate (6b)**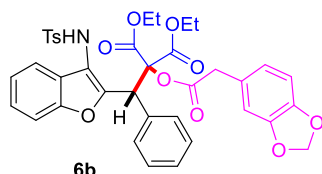**6b**

50.6 mg, 71% yield; colorless oil; eluent (petroleum ether/ethyl acetate = 6:1).  $^1\text{H}$  NMR (400 MHz,  $\text{CDCl}_3$ )  $\delta$  7.85 (s, 1NH), 7.70 (dd,  $J = 7.4, 1.7$  Hz, 1H), 7.64 (d,  $J = 8.0$  Hz, 2H), 7.30 (d,  $J = 8.0$  Hz, 1H), 7.26 – 7.16 (m, 5H), 7.12 (t,  $J = 7.6$  Hz, 2H), 6.88 – 6.82 (m, 2H), 6.70 (d,  $J = 7.7$  Hz, 1H), 6.53 (d,  $J = 8.3$  Hz, 2H), 5.93 (s, 2H), 4.82 (s, 1H), 4.09 – 3.96 (m, 3H), 3.89 (dd,  $J = 10.7, 7.1$  Hz, 1H), 3.46 (d,  $J = 16.0$  Hz, 1H), 3.31 (d,  $J = 16.0$  Hz, 1H), 2.42 (s, 3H), 1.01 (t,  $J = 7.1$  Hz, 3H), 0.85 (t,  $J = 7.1$  Hz, 3H).  $^{13}\text{C}$  NMR (100 MHz,  $\text{CDCl}_3$ )  $\delta$  169.5, 165.9, 153.6, 147.1, 143.6, 136.8, 133.4, 130.5, 129.8, 127.9, 127.7, 127.5, 126.0, 125.7, 124.9, 123.3, 122.7, 121.3, 116.2, 110.9, 110.0, 108.2, 101.1, 83.5, 63.2, 62.9, 45.9, 40.0, 21.6, 13.6, 13.3. HRMS (ESI-TOF)  $m/z$ :  $[\text{M} + \text{Na}]^+$  Calcd for  $\text{C}_{38}\text{H}_{35}\text{NNaO}_{11}\text{S}^+$  722.1667; Found 722.1667.

**Diethyl(R)-2-(cinnamoyloxy)-2-((3-((4-methylphenyl)sulfonamido)benzofuran-2-yl)(phenyl)methyl)malonate (6c)**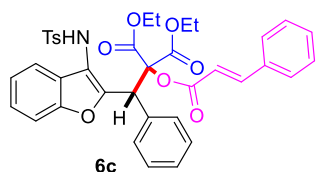**6c**

35.4 mg, 52% yield; colorless oil; eluent (petroleum ether/ethyl acetate = 6:1).  $^1\text{H}$  NMR (400 MHz,  $\text{CDCl}_3$ )  $\delta$  8.05 (s, 1NH), 7.79 – 7.74 (m, 1H), 7.70 (d,  $J = 8.0$  Hz, 2H), 7.49 – 7.37 (m, 6H), 7.23 – 7.18 (m, 5H), 7.15 (q,  $J = 6.8, 6.1$  Hz, 3H), 7.00 – 6.93 (m, 2H), 6.38 (d,  $J = 15.9$  Hz, 1H), 4.87 (s, 1H), 4.18 – 3.98 (m, 4H), 2.43 (s, 3H), 1.05 (t,  $J = 7.1$  Hz, 3H), 0.96 (t,  $J = 7.1$  Hz, 3H).  $^{13}\text{C}$  NMR (100 MHz,  $\text{CDCl}_3$ )  $\delta$  166.5, 165.9, 164.5, 153.6, 147.1, 146.9, 143.5, 136.9, 133.9, 133.6, 130.8, 130.4, 129.8, 129.0, 128.3, 127.9, 127.8, 127.5, 125.9, 124.8, 123.2, 121.4,

116.2, 116.0, 110.9, 83.4, 63.2, 62.8, 45.8, 21.6, 13.6, 13.4. HRMS (ESI-TOF)  $m/z$ :  $[M + Na]^+$  Calcd for  $C_{38}H_{35}NNaO_9S^+$  704.1925; Found 704.1920.

**Diethyl(R)-2-((3-((4-methylphenyl)sulfonamido)benzofuran-2-yl)(phenyl)methyl)-2-(pent-4-ynoyloxy)malonate (6d)**

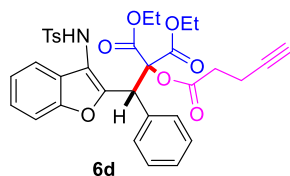

15.8 mg, 25% yield; colorless oil; eluent (petroleum ether/ethyl acetate = 6:1).  $^1H$  NMR (400 MHz,  $CDCl_3$ )  $\delta$  7.93 (s, 1NH), 7.72 (dd,  $J = 7.1$ , 1.9 Hz, 1H), 7.67 (d,  $J = 8.0$  Hz, 2H), 7.31 – 7.27 (m, 1H), 7.21 (dd,  $J = 8.1$ , 6.3 Hz, 5H), 7.14 (t,  $J = 7.5$  Hz, 2H), 6.94 – 6.87 (m, 2H), 4.83 (s, 1H), 4.12 – 4.00 (m, 3H), 3.97 – 3.87 (m, 1H), 2.51 (dt,  $J = 16.7$ , 7.6 Hz, 1H),

2.43 (s, 3H), 2.35 (ddd,  $J = 16.7$ , 8.5, 6.5 Hz, 1H), 2.20 (ddd,  $J = 10.8$ , 5.6, 3.3 Hz, 2H), 1.91 (t,  $J = 2.6$  Hz, 1H), 1.05 (t,  $J = 7.1$  Hz, 3H), 0.90 (t,  $J = 7.2$  Hz, 3H).  $^{13}C$  NMR (100 MHz,  $CDCl_3$ )  $\delta$  169.6, 165.9, 147.0, 143.6, 136.8, 133.5, 130.4, 129.8, 127.9, 127.8, 127.5, 125.0, 123.3, 121.4, 116.3, 110.7, 83.3, 81.9, 69.2, 63.3, 62.9, 45.7, 32.7, 21.6, 13.8, 13.6, 13.3. HRMS (ESI-TOF)  $m/z$ :  $[M + Na]^+$  Calcd for  $C_{34}H_{33}NNaO_9S^+$  654.1768; Found 654.1764.

**Diethyl (R)-2-((adamantane-1-carbonyloxy)-2-((3-((4-methylphenyl)sulfonamido)benzofuran-2-yl)(phenyl)methyl)malonate (6e)**

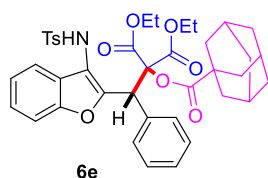

19.3 mg, 27% yield; colorless oil; eluent (petroleum ether/ethyl acetate = 6:1).  $^1H$  NMR (400 MHz,  $CDCl_3$ )  $\delta$  7.95 (s, 1NH), 7.75 – 7.70 (m, 1H), 7.67 (d,  $J = 8.0$  Hz, 2H), 7.30 – 7.26 (m, 1H), 7.24 – 7.16 (m, 5H), 7.14 (t,  $J = 7.3$  Hz, 2H), 6.92 (d,  $J = 7.1$  Hz, 2H), 4.84 (s, 1H), 4.04 (dp,  $J = 21.8$ , 7.2 Hz, 3H), 3.92 – 3.83 (m, 1H), 2.43 (s, 3H), 1.99 – 1.90 (m, 3H), 1.74 – 1.58 (m, 12H),

1.03 (t,  $J = 7.1$  Hz, 3H), 0.85 (t,  $J = 7.1$  Hz, 3H).  $^{13}C$  NMR (100 MHz,  $CDCl_3$ )  $\delta$  153.6, 147.4, 143.5, 136.8, 133.7, 130.6, 129.8, 127.8, 127.7, 127.5, 124.8, 123.2, 121.4, 116.1, 110.8, 82.7, 63.0, 62.6, 45.9, 40.5, 38.1, 36.3, 27.7, 21.6, 13.6, 13.3. HRMS (ESI-TOF)  $m/z$ :  $[M + Na]^+$  Calcd for  $C_{40}H_{43}NNaO_9S^+$  736.2551; Found 736.2553.

**Diethyl (R)-2-((3-((4-methylphenyl)sulfonamido)benzofuran-2-yl)(phenyl)methyl)-2-(undec-10-enoyloxy)malonate (6g)**

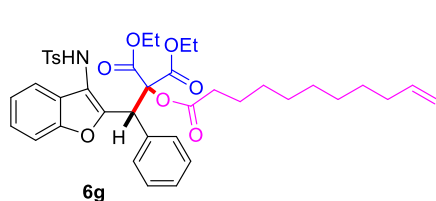

52.4 mg, 73% yield; colorless oil; eluent (petroleum ether/ethyl acetate = 6:1).  $^1H$  NMR (400 MHz,  $CDCl_3$ )  $\delta$  8.01 (s, 1NH), 7.78 – 7.71 (m, 1H), 7.68 (d,  $J = 7.9$  Hz, 2H), 7.27 (d,  $J = 6.5$  Hz, 1H), 7.19 (t,  $J = 8.3$  Hz, 5H), 7.13 (t,  $J = 7.5$  Hz, 2H), 6.89 (d,  $J = 7.5$  Hz, 2H), 5.81 (ddt,  $J = 16.9$ , 10.1,

6.7 Hz, 1H), 4.96 (dd,  $J = 23.1$ , 13.6 Hz, 2H), 4.83 (s, 1H), 4.06 (dq,  $J = 18.6$ , 7.2 Hz, 3H), 3.89 (dd,  $J = 10.7$ , 7.0 Hz, 1H), 2.43 (s, 3H), 2.20 (dt,  $J = 15.3$ , 7.4 Hz, 1H), 2.07 (dq,  $J = 28.0$ , 7.3 Hz, 3H), 1.39 – 1.16 (m, 12H), 1.04 (t,  $J = 7.1$  Hz, 3H), 0.87 (t,  $J = 7.1$  Hz, 3H).  $^{13}C$  NMR (100 MHz,  $CDCl_3$ )  $\delta$  153.6, 147.2, 143.6, 136.8, 136.4, 133.6, 130.5, 129.9, 127.8, 127.8, 127.5, 124.9, 123.3, 122.0, 121.6, 121.4, 119.2, 118.8, 116.2, 115.2, 111.1, 110.8, 83.1, 63.2, 62.8, 45.9, 33.1, 24.6, 24.1, 21.6, 13.6, 13.3. HRMS (ESI-TOF)  $m/z$ :  $[M + Na]^+$  Calcd for  $C_{40}H_{47}NNaO_9S^+$  740.2865; Found 740.2866.

**Diethyl (R)-2-((4-(1H-indol-3-yl)butanoyloxy)-2-((3-((4-methylphenyl)sulfonamido)benzofuran-2-yl)(phenyl)methyl)malonate (6f).**

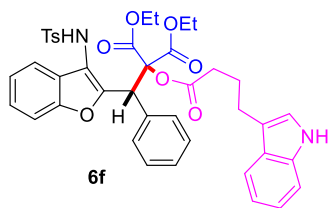

21.4 mg, 29% yield; colorless oil; eluent (petroleum ether/ethyl acetate = 6:1).  $^1\text{H}$  NMR (400 MHz,  $\text{CDCl}_3$ )  $\delta$  7.99 (s, 2NH), 7.76 – 7.70 (m, 1H), 7.68 (d,  $J$  = 7.9 Hz, 2H), 7.53 (d,  $J$  = 7.9 Hz, 1H), 7.35 (d,  $J$  = 8.1 Hz, 1H), 7.22 – 7.07 (m, 10H), 6.95 – 6.84 (m, 3H), 4.85 (s, 1H), 4.07 (dq,  $J$  = 14.2, 7.2 Hz, 3H), 3.92 (dd,  $J$  = 10.7, 7.1 Hz, 1H), 2.65 (t,  $J$  = 7.5 Hz, 2H), 2.41 (s, 3H), 2.24 (ddd,  $J$  = 39.1, 16.2, 8.4 Hz, 2H), 1.78 (p,  $J$  = 7.4 Hz, 2H), 1.05 (t,  $J$  = 7.1 Hz, 3H), 0.89 (t,  $J$  = 7.1 Hz, 3H).  $^{13}\text{C}$  NMR (100 MHz,  $\text{CDCl}_3$ )  $\delta$  147.1, 143.5, 139.1, 136.8, 133.6, 130.5, 129.8, 127.8, 127.7, 127.5, 124.9, 123.3, 121.4, 116.2, 114.2, 110.8, 83.0, 63.2, 62.8, 45.8, 33.8, 33.5, 29.2, 29.1, 29.0, 28.9, 28.8, 24.2, 21.6, 13.6, 13.3. HRMS (ESI-TOF)  $m/z$ :  $[\text{M} + \text{Na}]^+$  Calcd for  $\text{C}_{41}\text{H}_{40}\text{N}_2\text{O}_9\text{SNa}^+$  759.2347; Found 759.2353.

**dimethyl (S)-2-hydroxy-2-((3-((4-methylphenyl)sulfonamido)benzofuran-2-yl)(phenyl)methyl)malonate (7a).**

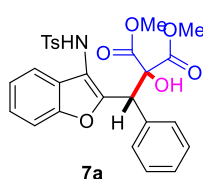

19.7 mg, 75% yield; colorless oil; eluent (petroleum ether/ethyl acetate = 6:1).  $^1\text{H}$  NMR (600 MHz,  $\text{CDCl}_3$ )  $\delta$  7.63 – 7.55 (m, 3H), 7.41 (d,  $J$  = 8.3 Hz, 1H), 7.28 (s, 1NH), 7.23 (dd,  $J$  = 12.5, 7.0 Hz, 2H), 7.15 (dd,  $J$  = 21.7, 10.2 Hz, 7H), 4.73 (d,  $J$  = 2.9 Hz, 1H), 4.05 (s, 1OH), 3.72 (d,  $J$  = 3.0 Hz, 3H), 3.58 (d,  $J$  = 3.0 Hz, 3H), 2.40 (s, 3H).  $^{13}\text{C}$  NMR (100 MHz,  $\text{CDCl}_3$ )  $\delta$  170.0, 169.2, 153.8, 148.6, 143.7, 136.6, 133.8, 130.0, 129.7, 128.0, 128.0, 127.4, 125.4, 124.8, 123.1, 120.8, 115.7, 111.5, 82.0, 54.0, 53.9, 46.2, 21.6. HRMS (ESI-TOF)  $m/z$ :  $[\text{M} + \text{H}]^+$  Calcd for  $\text{C}_{27}\text{H}_{26}\text{NO}_8\text{S}^+$  524.1374; Found 524.1375.

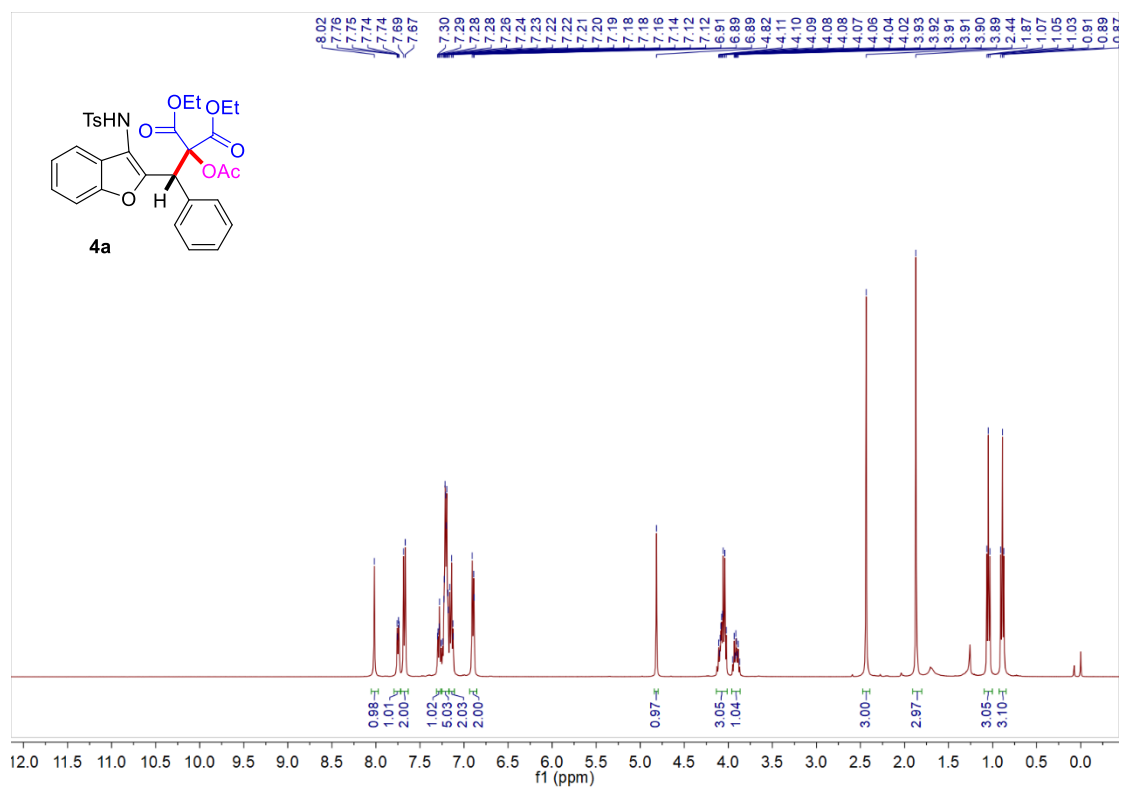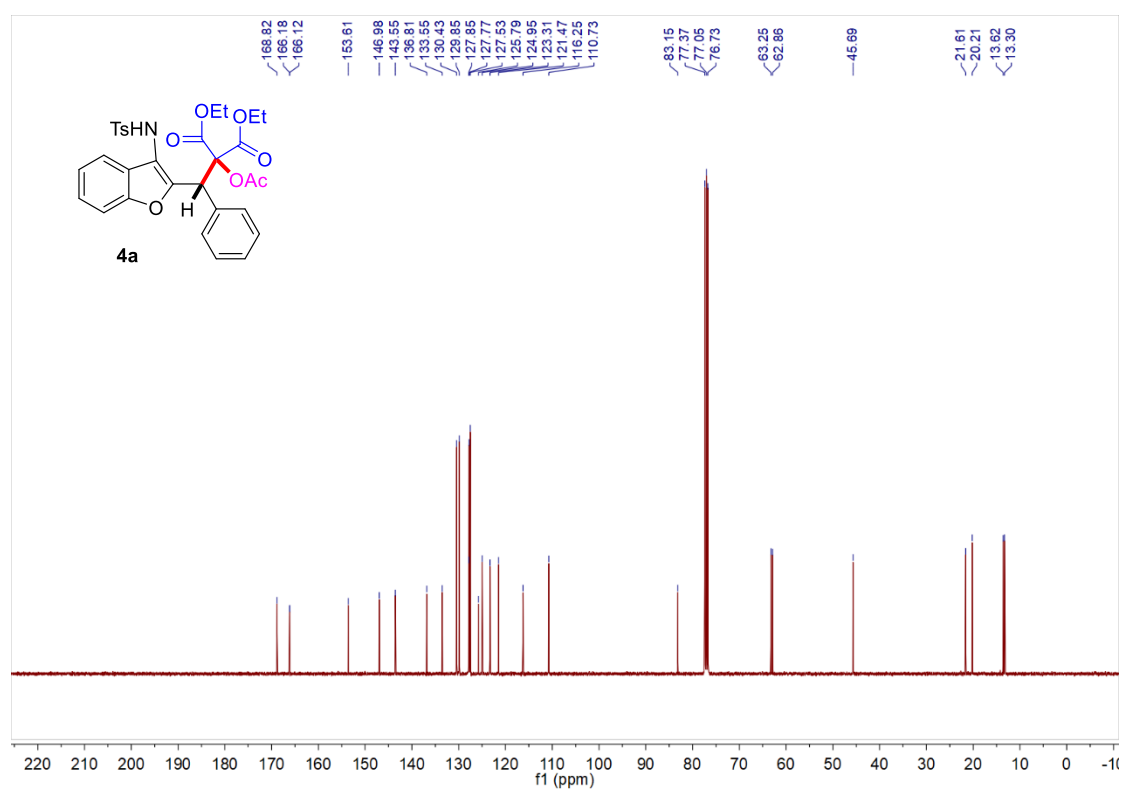

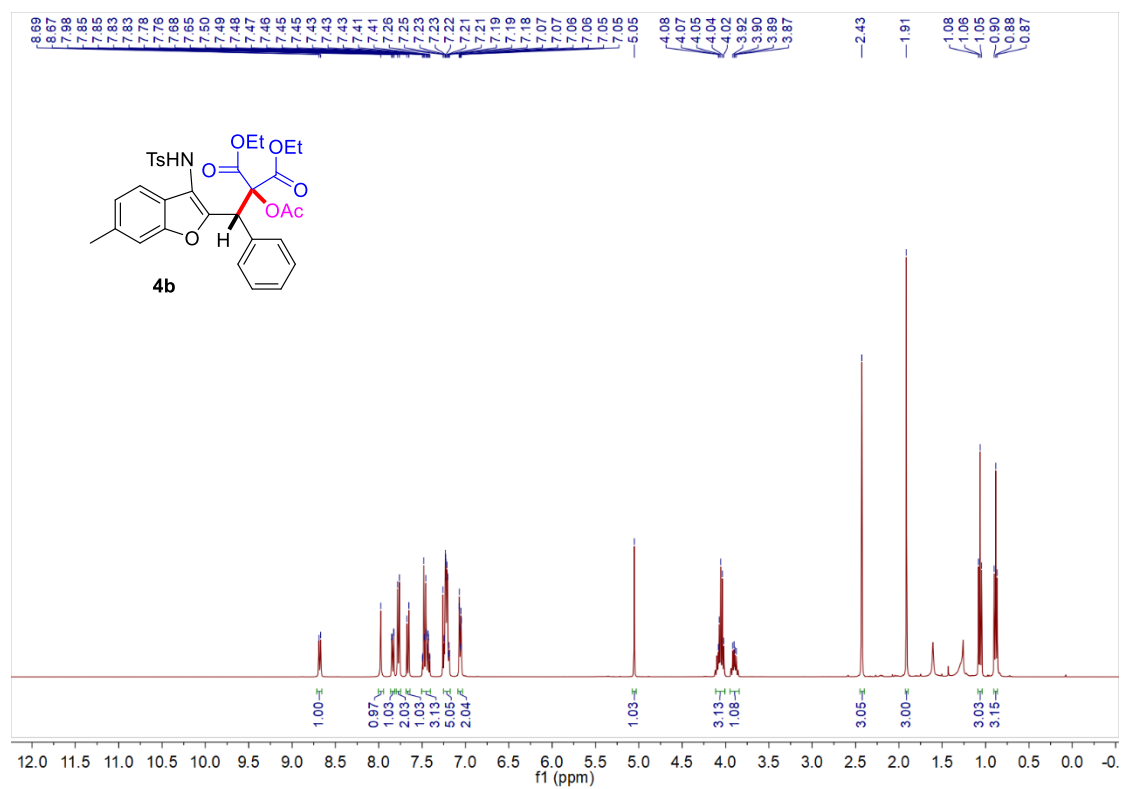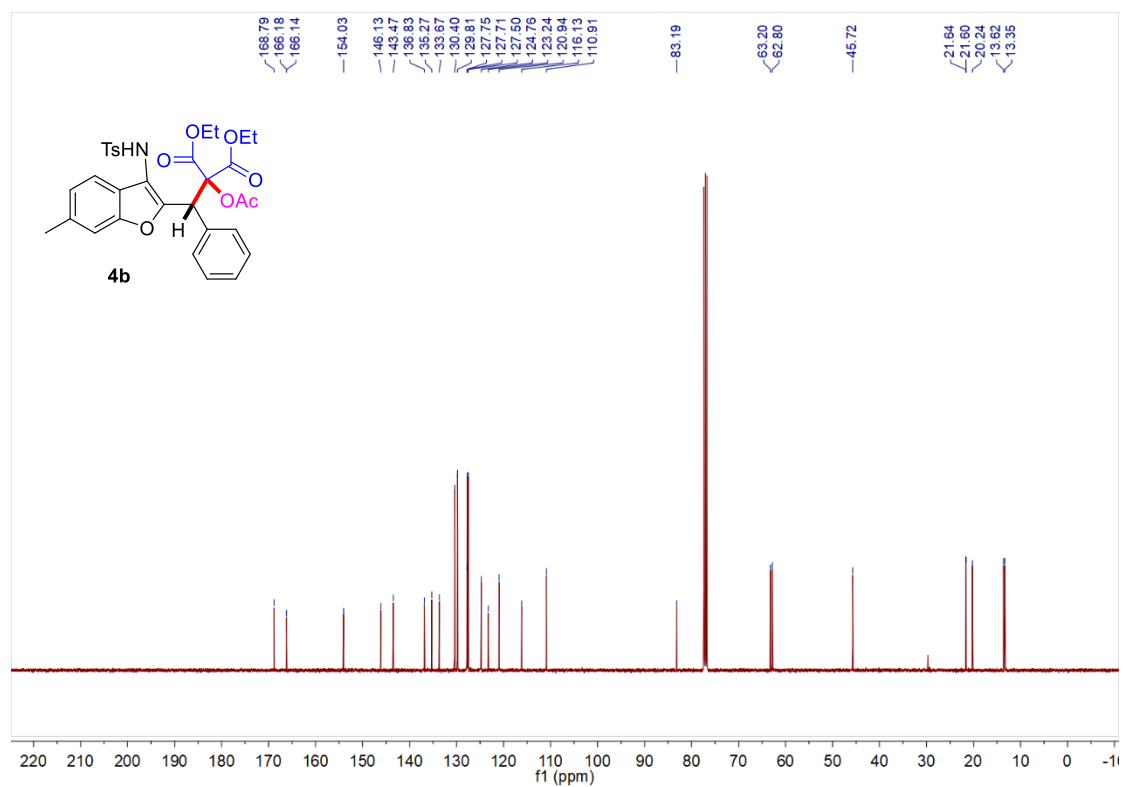

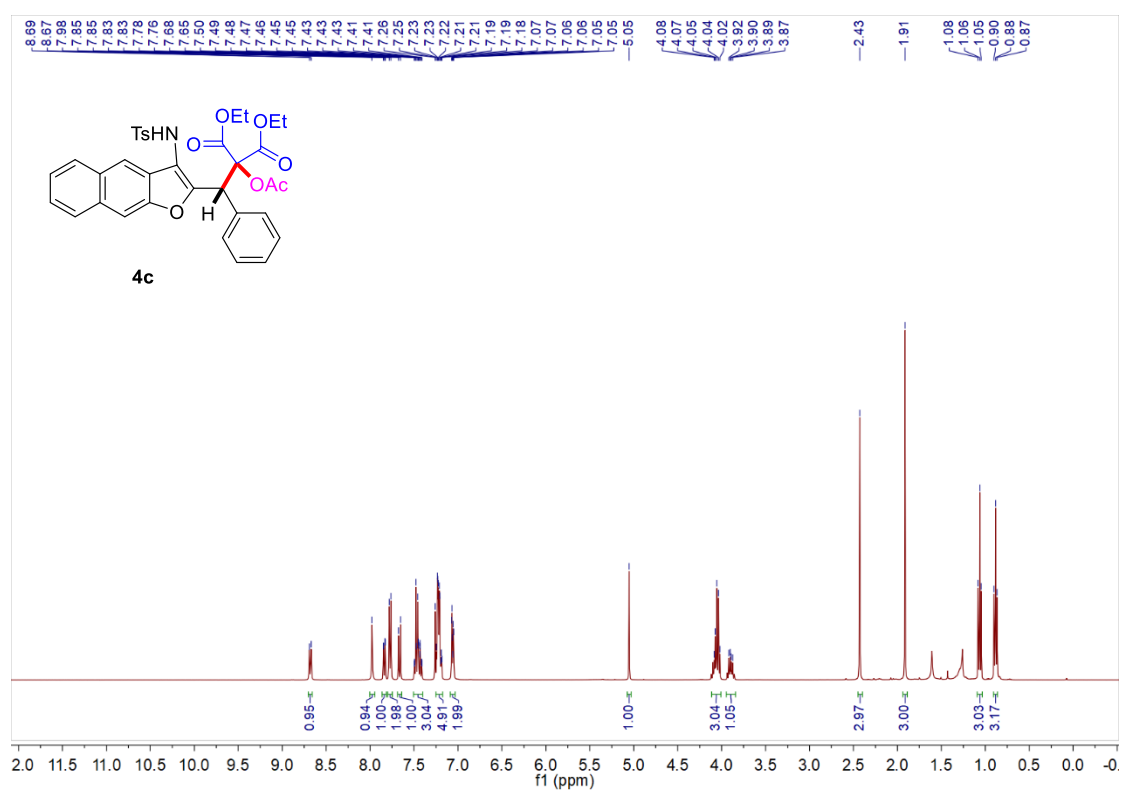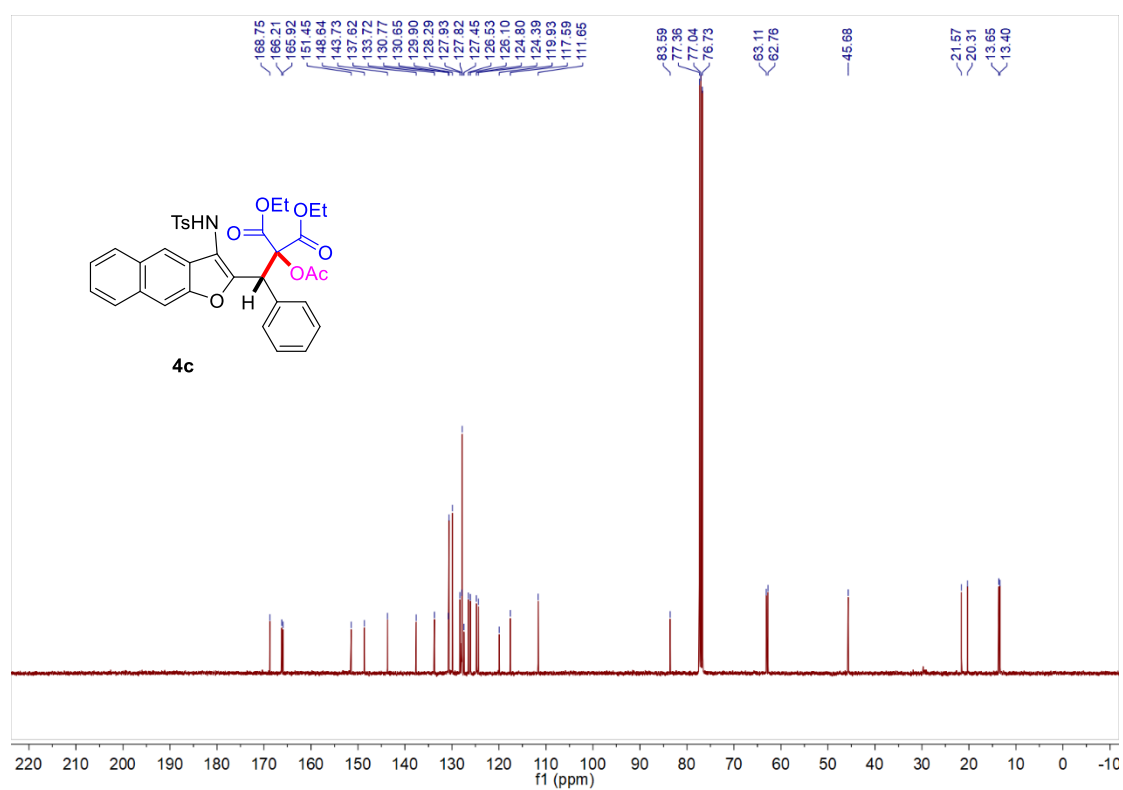

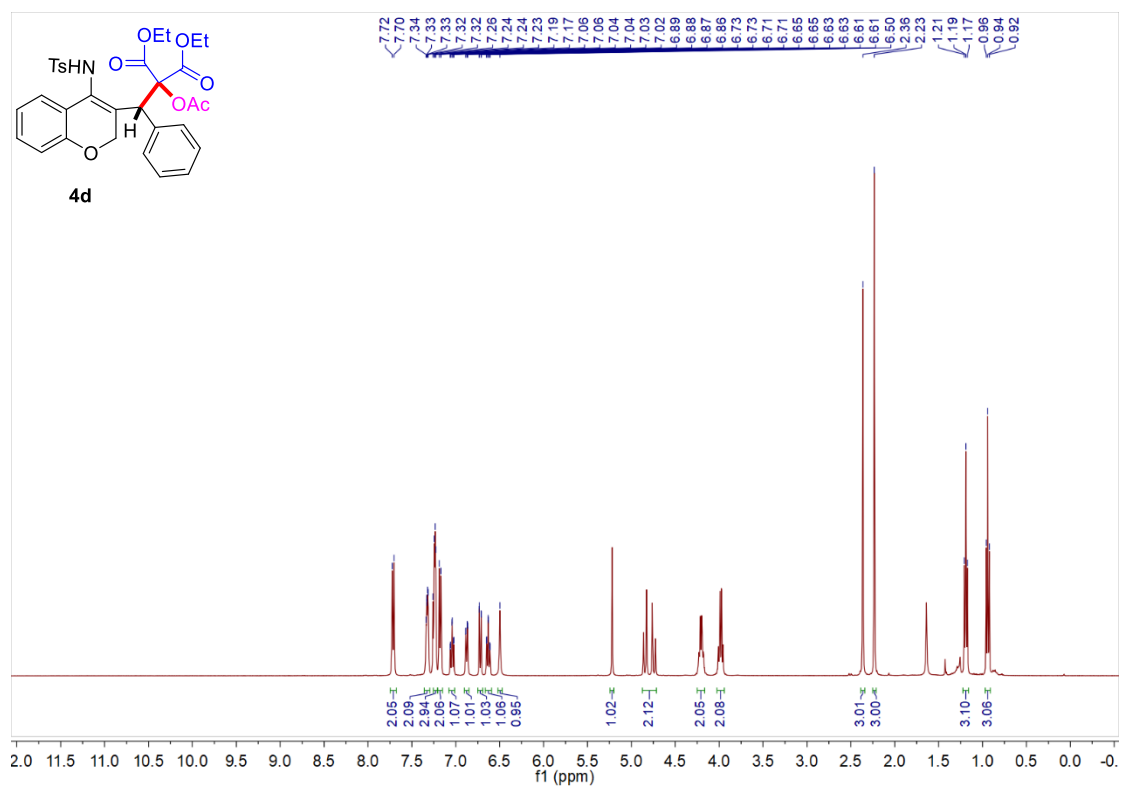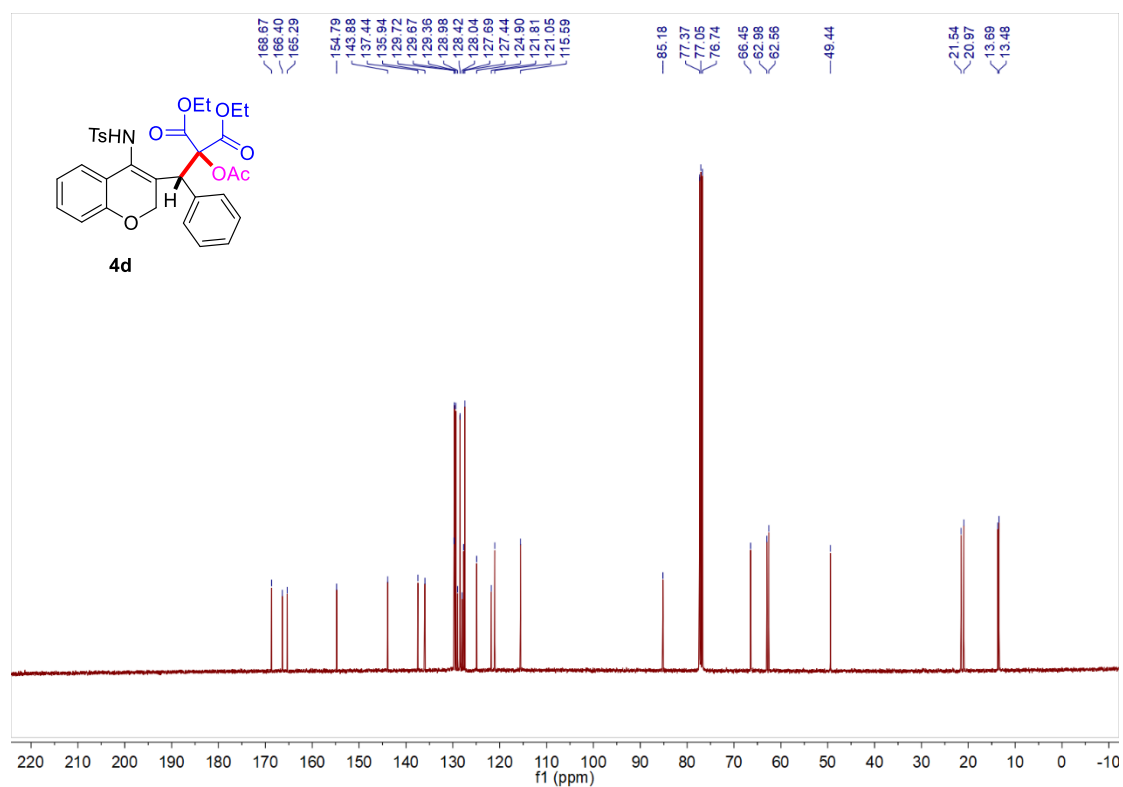

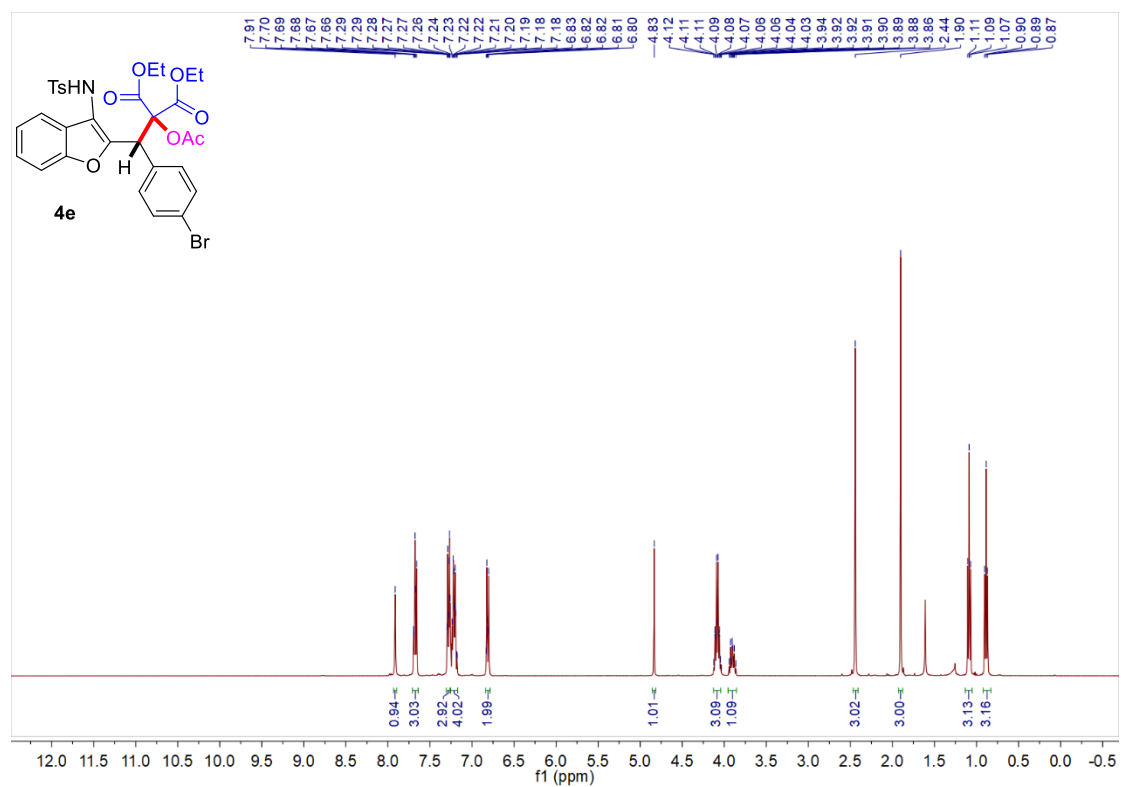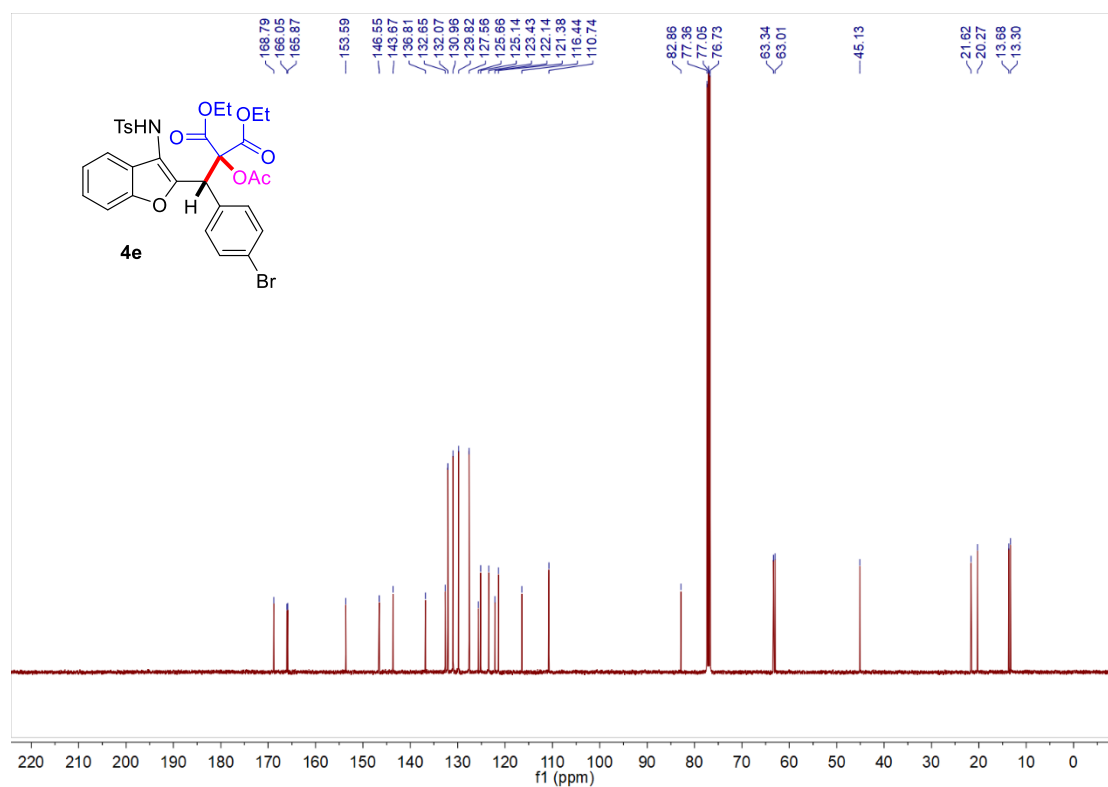

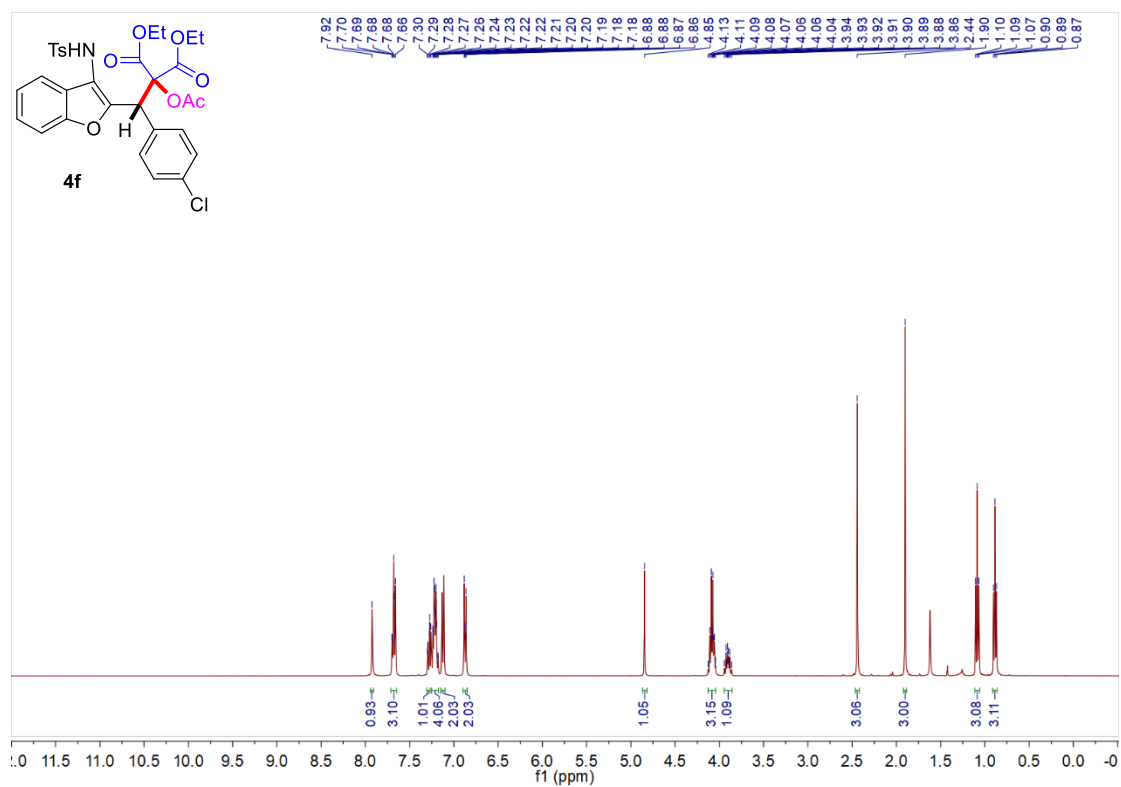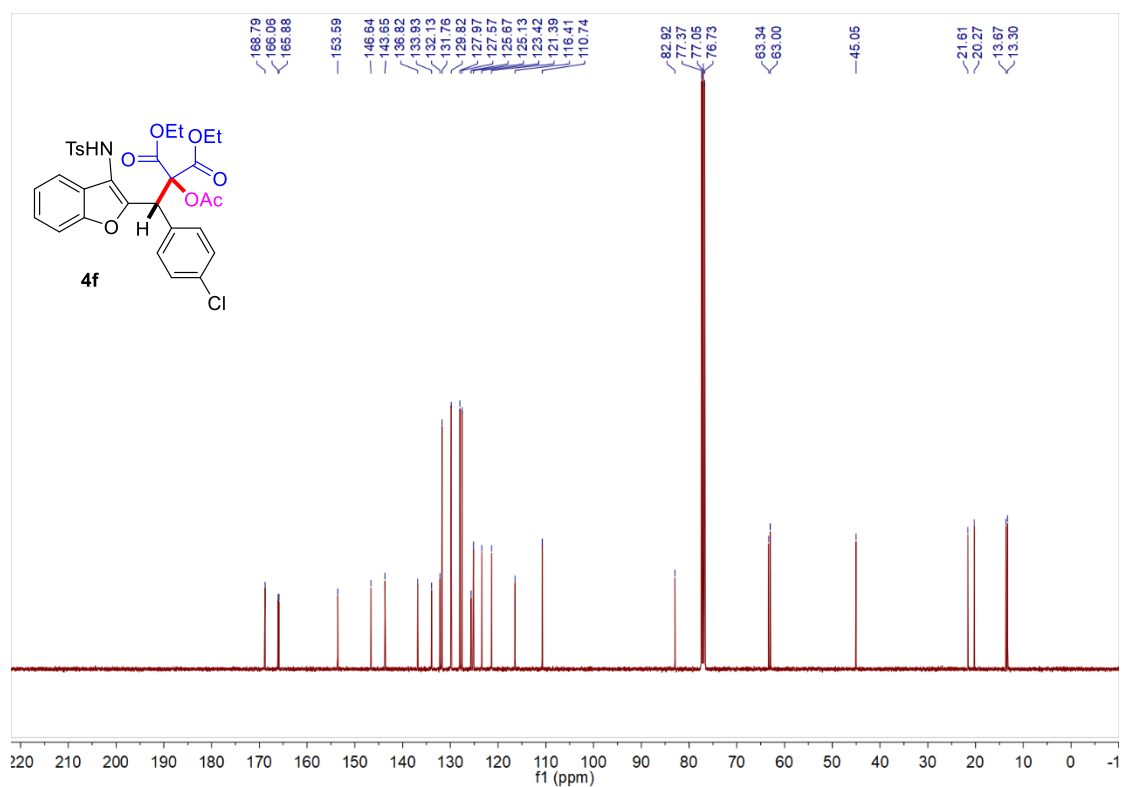

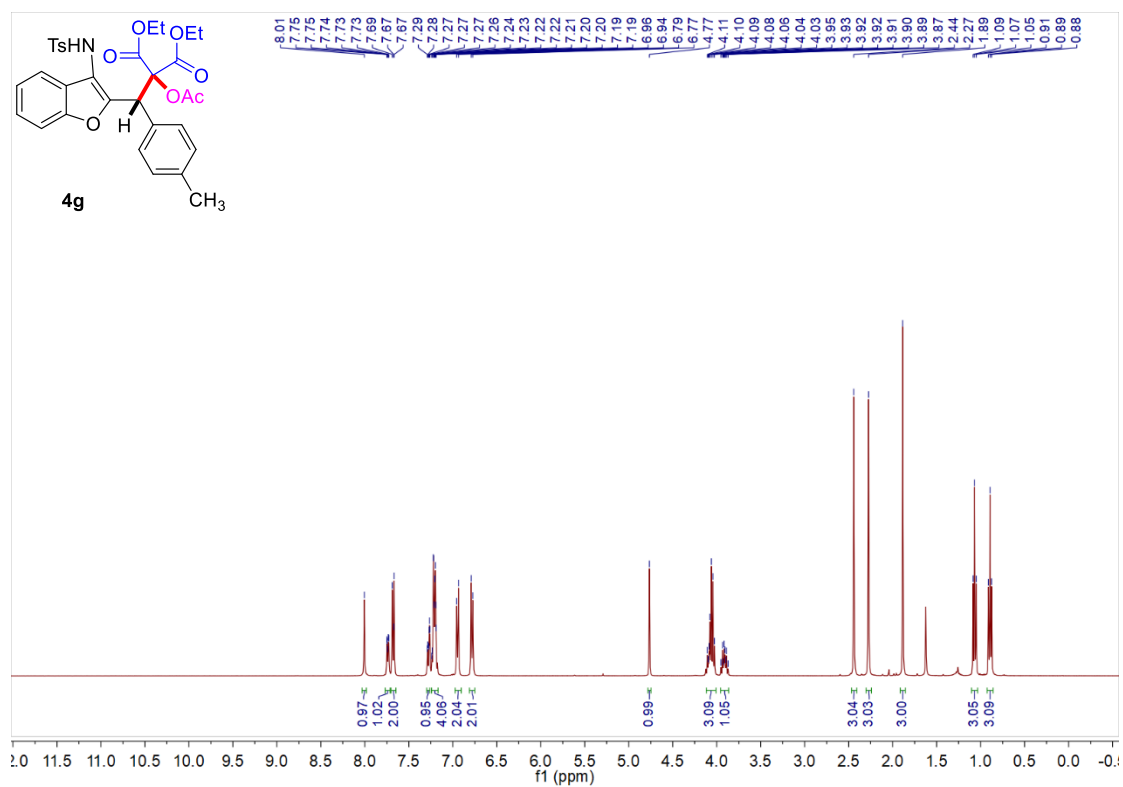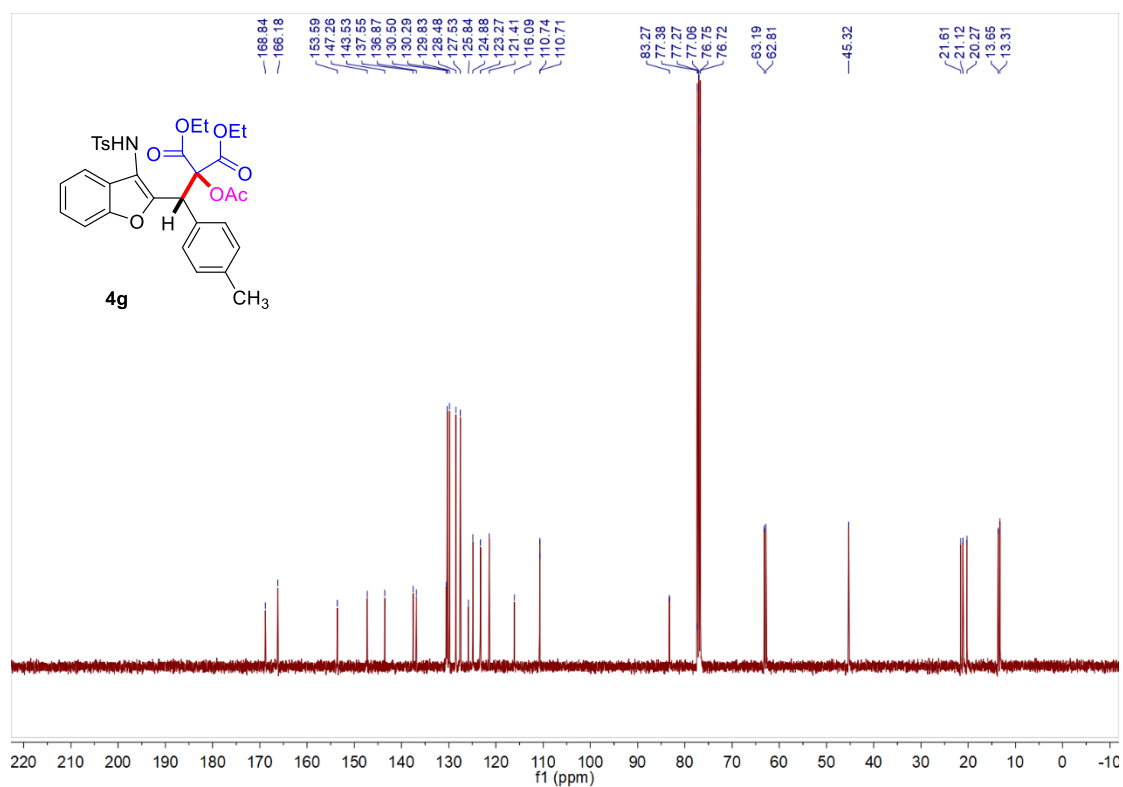

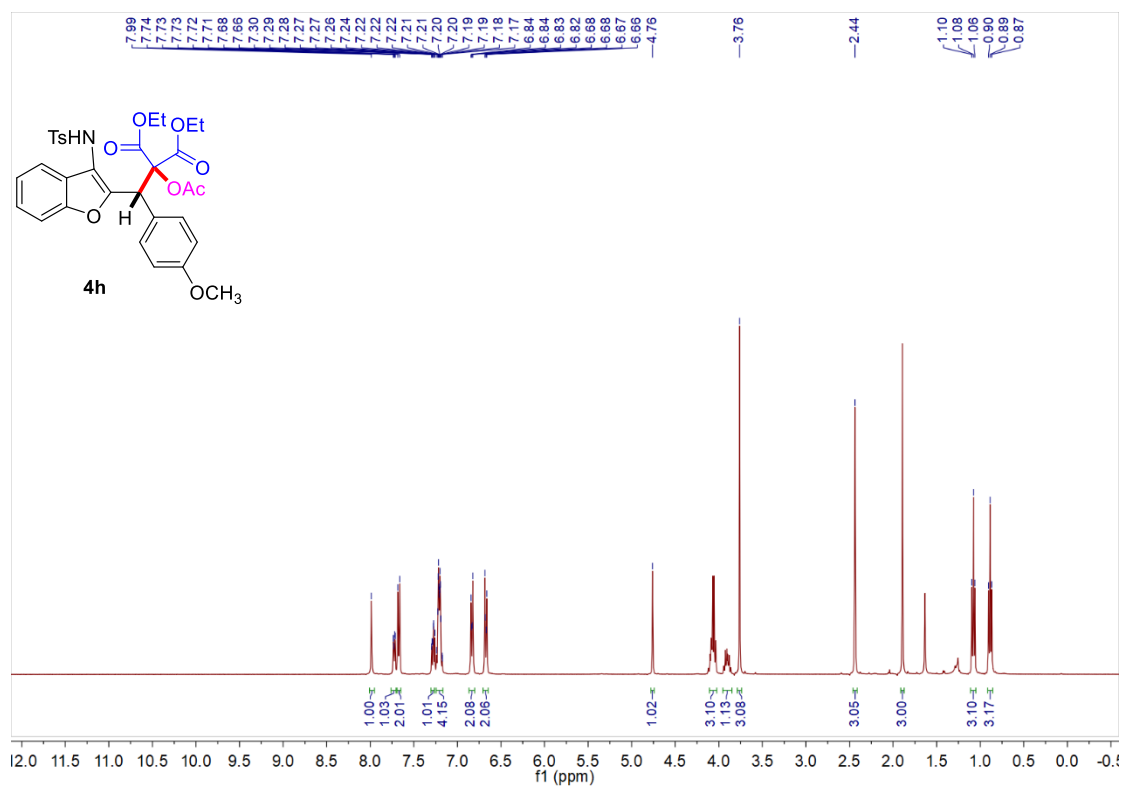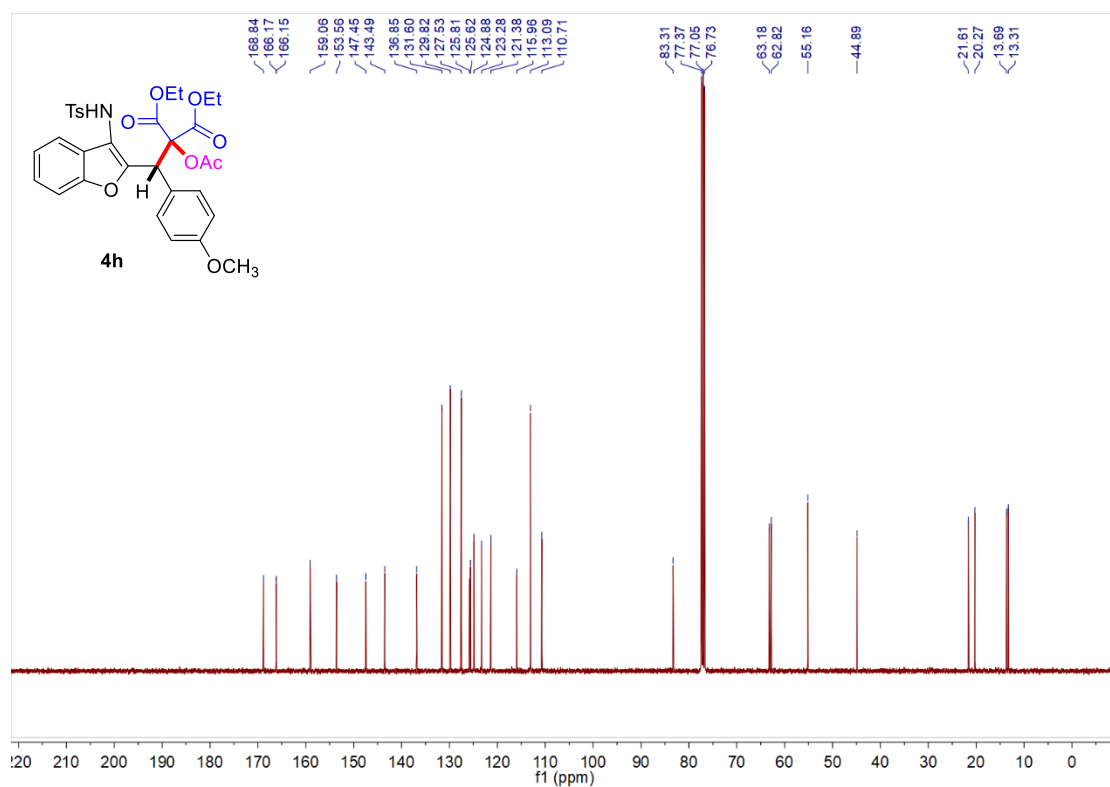

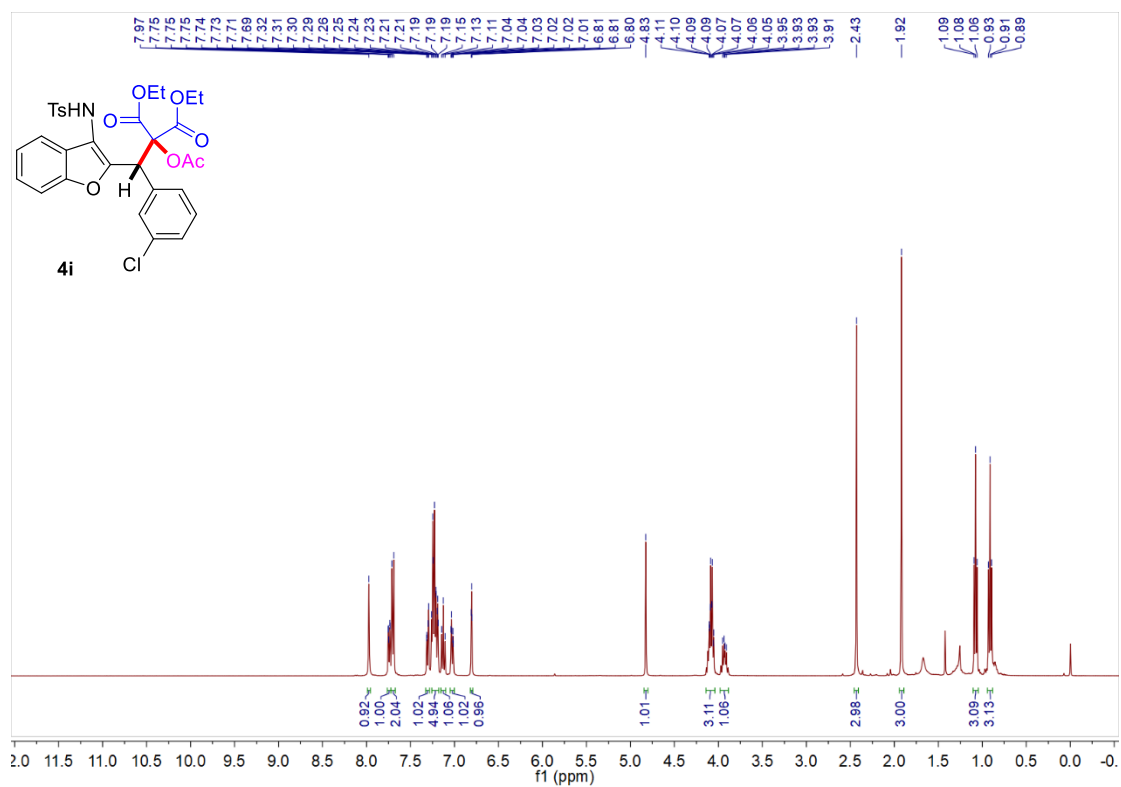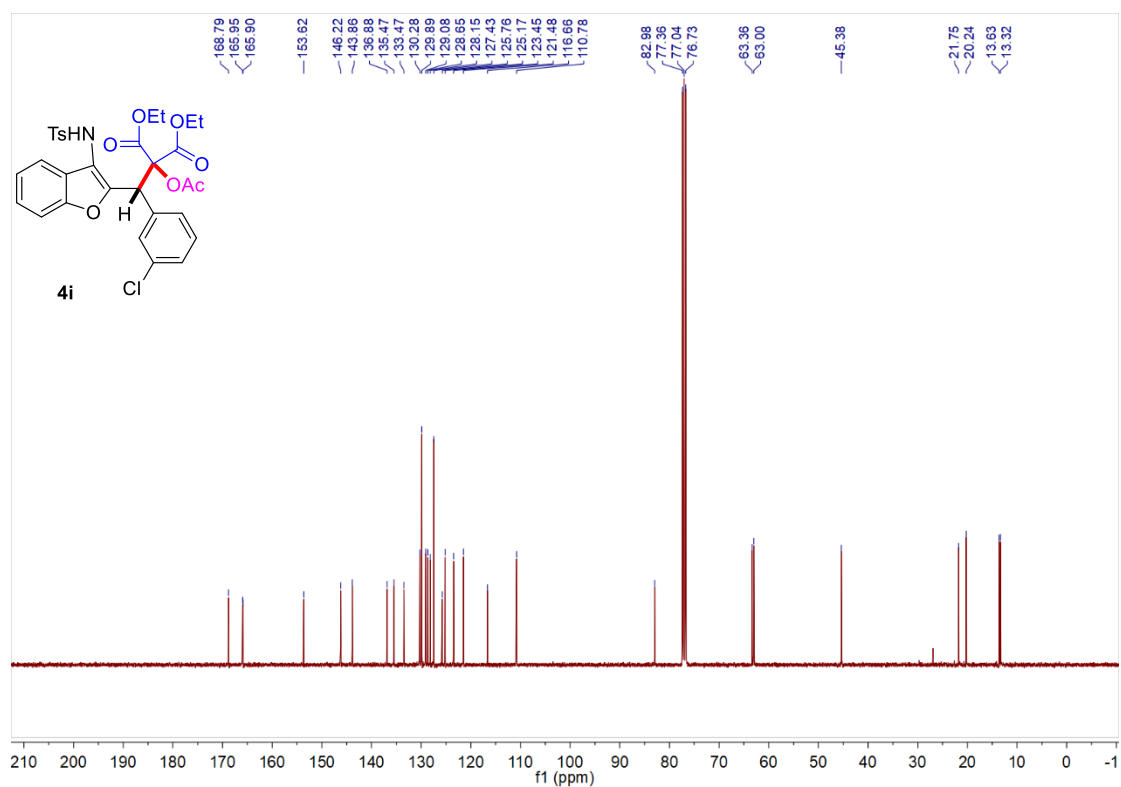

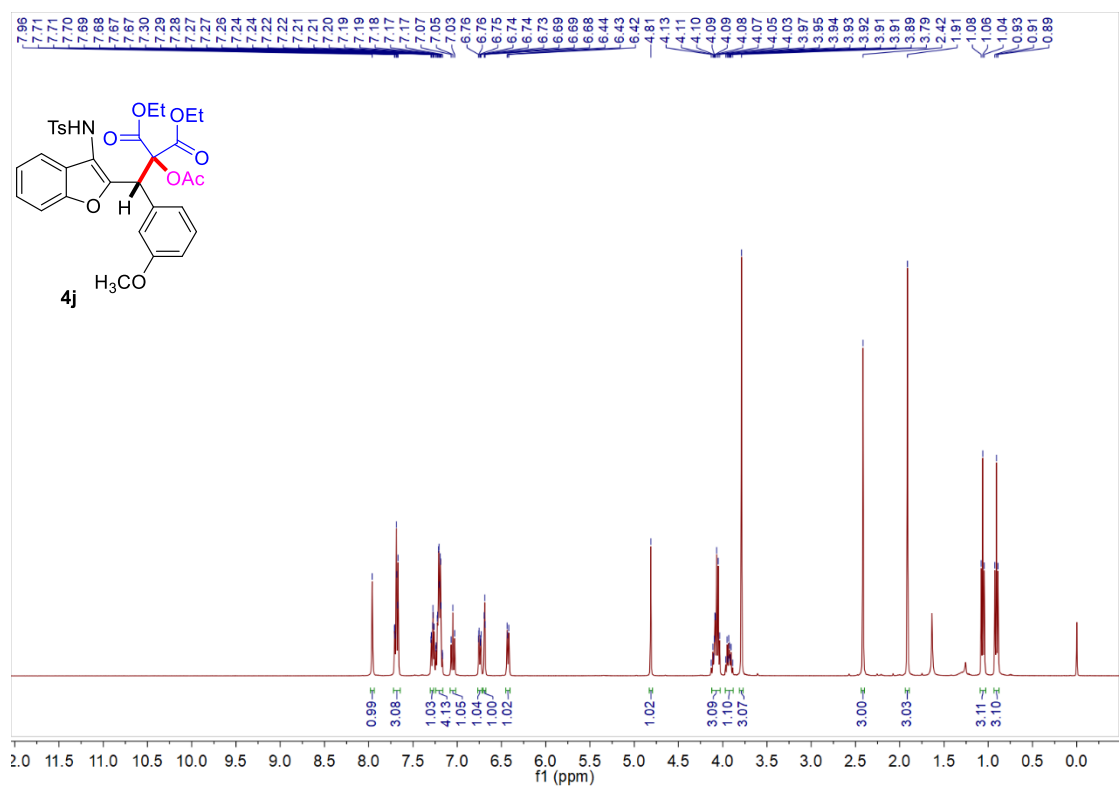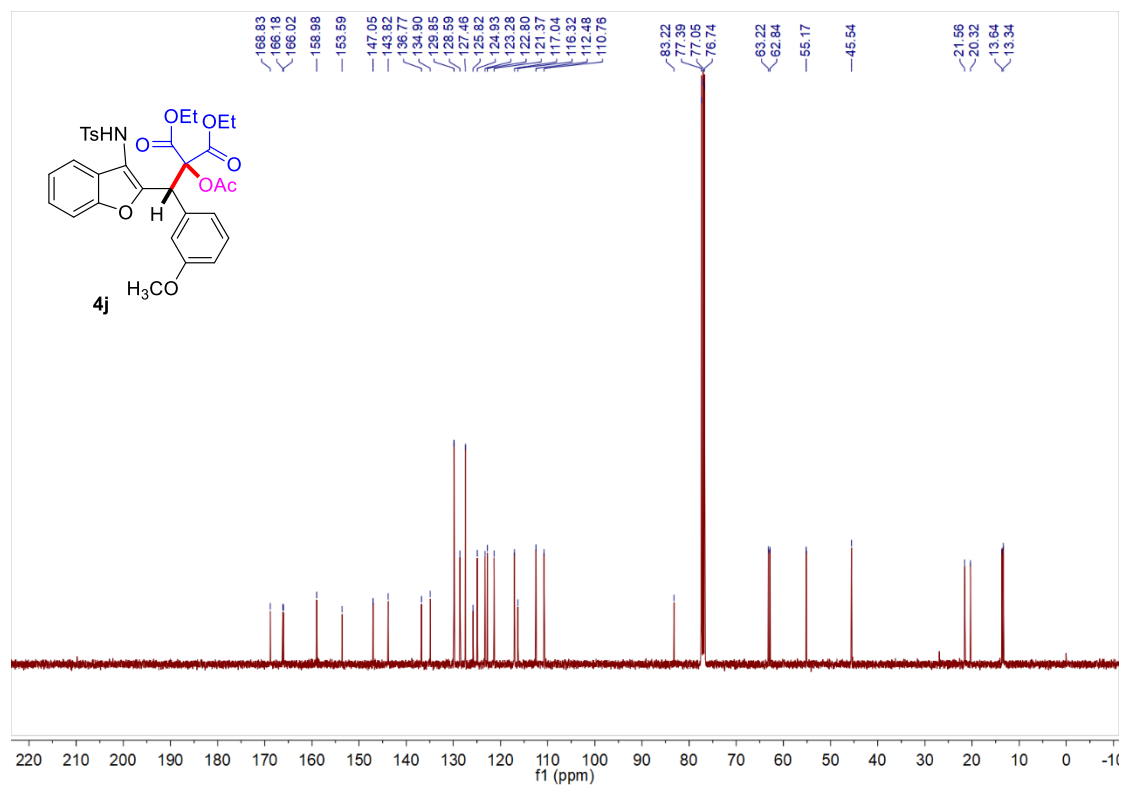

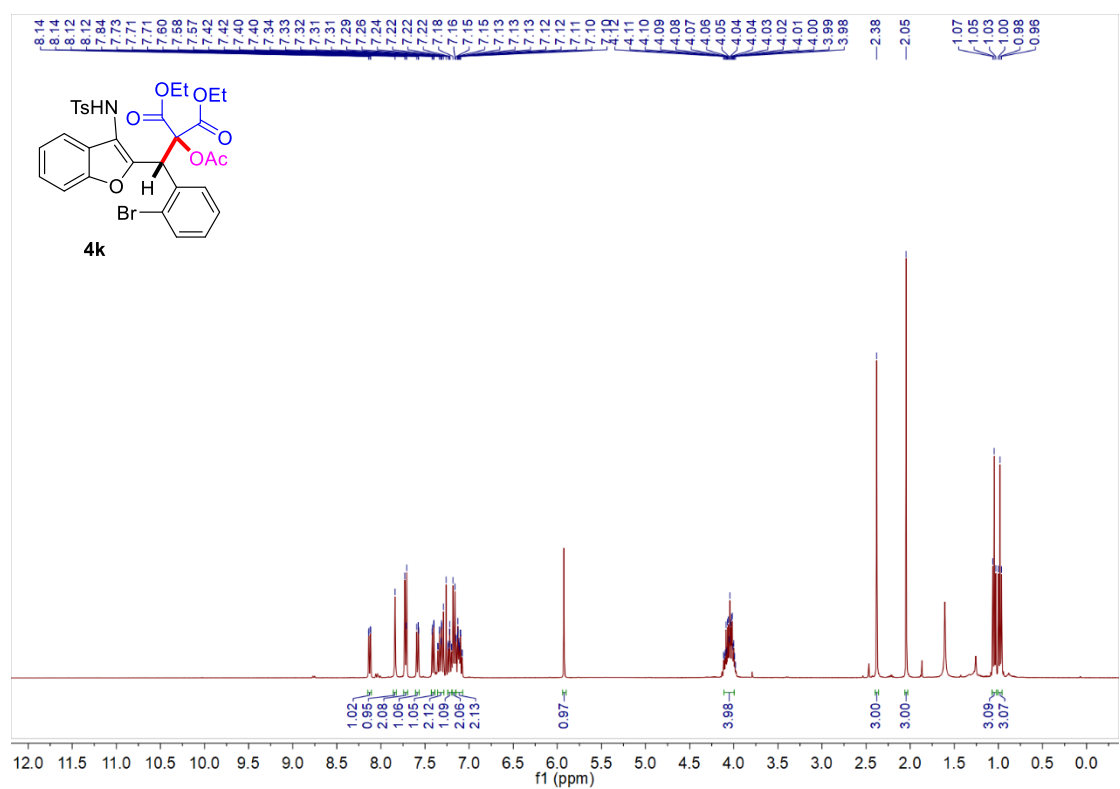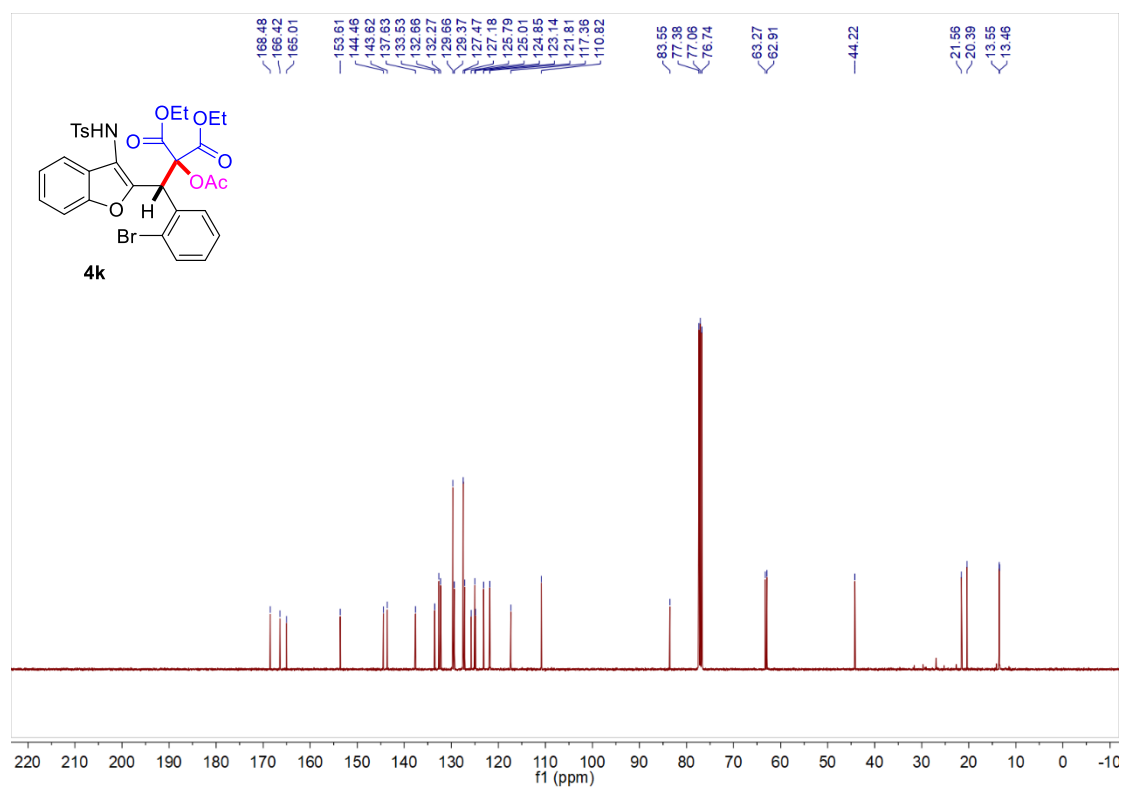

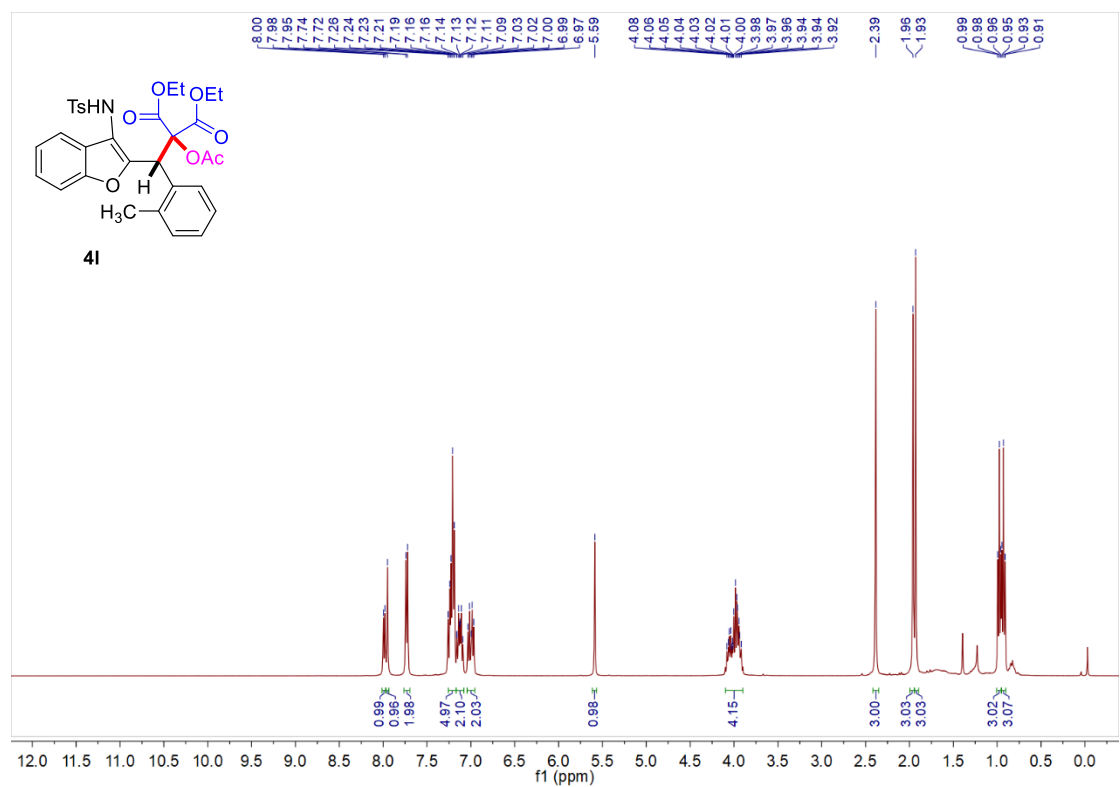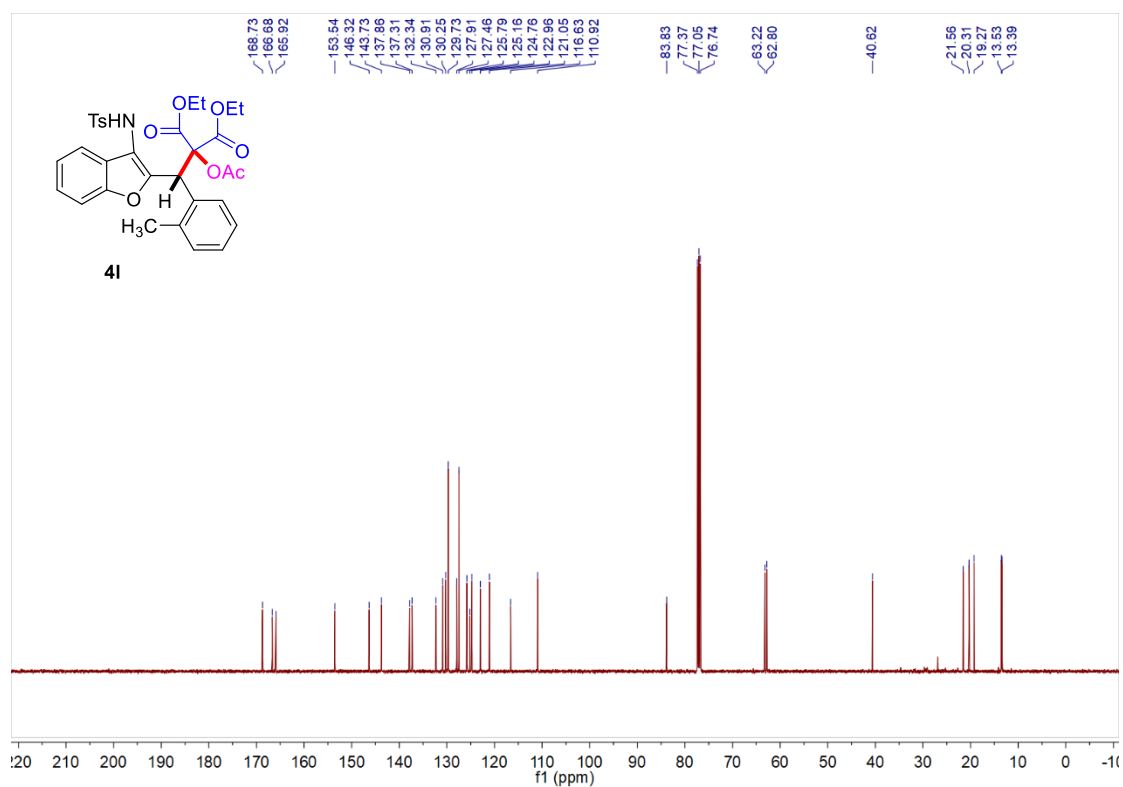

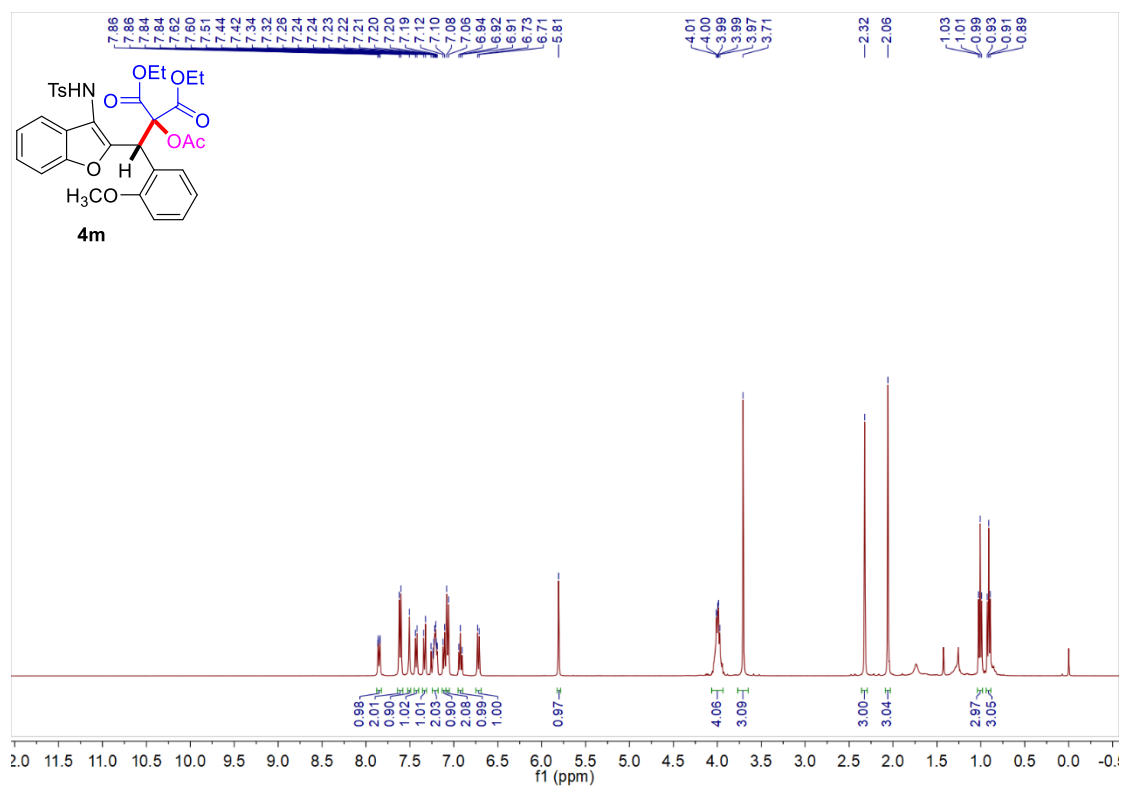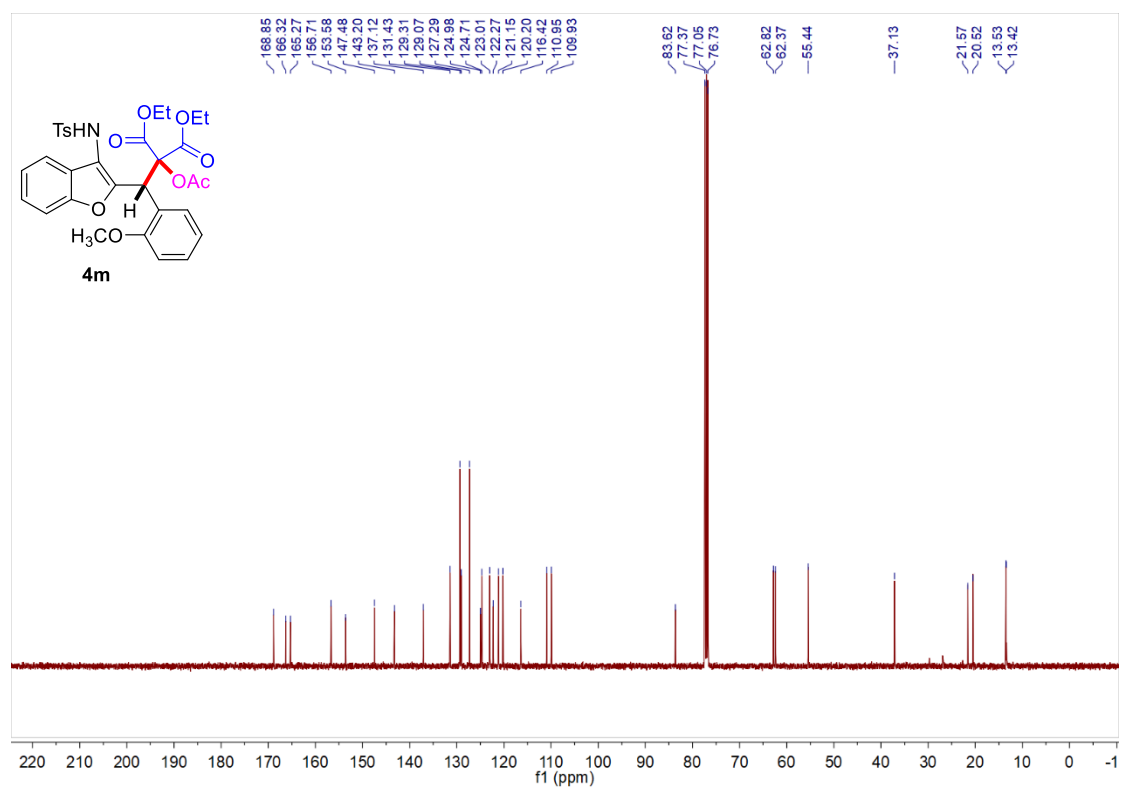

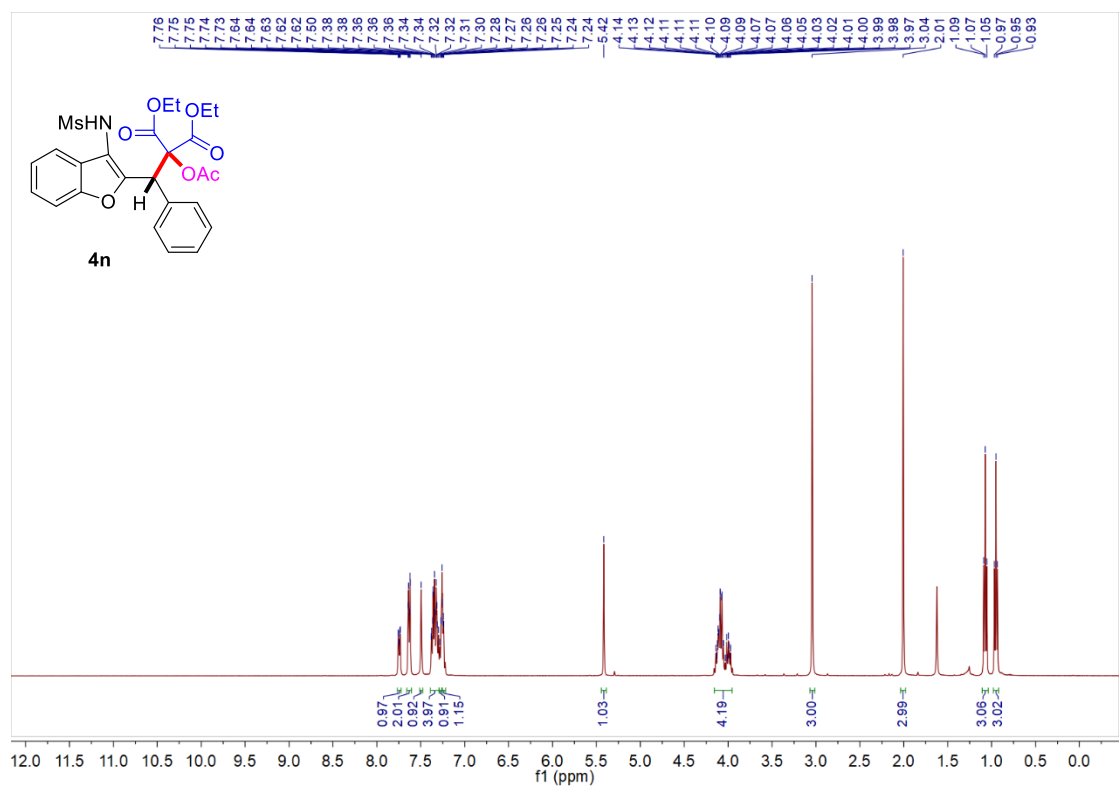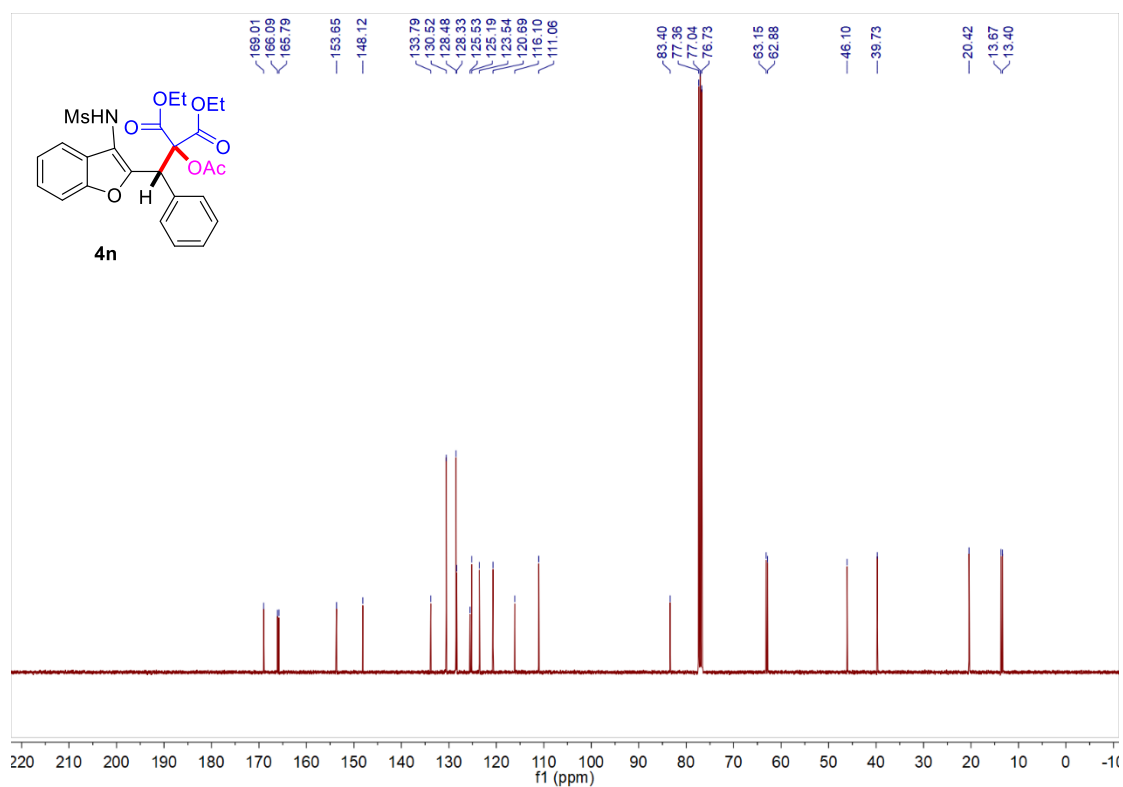

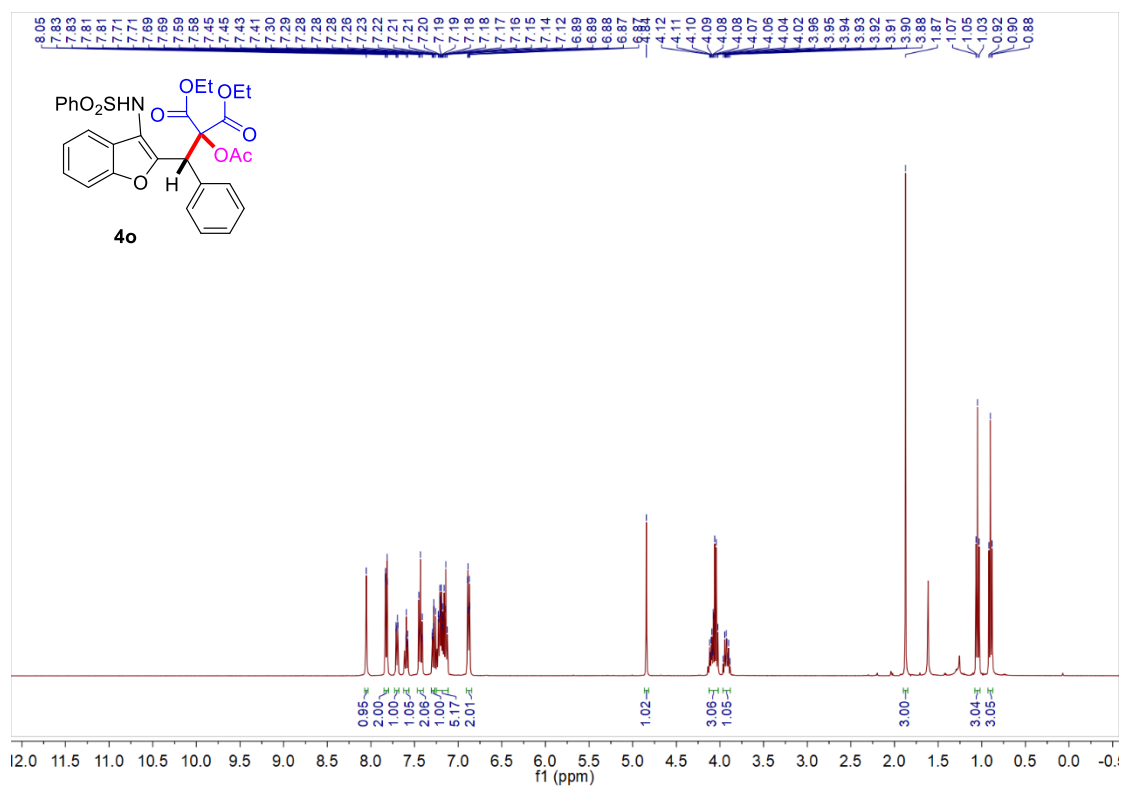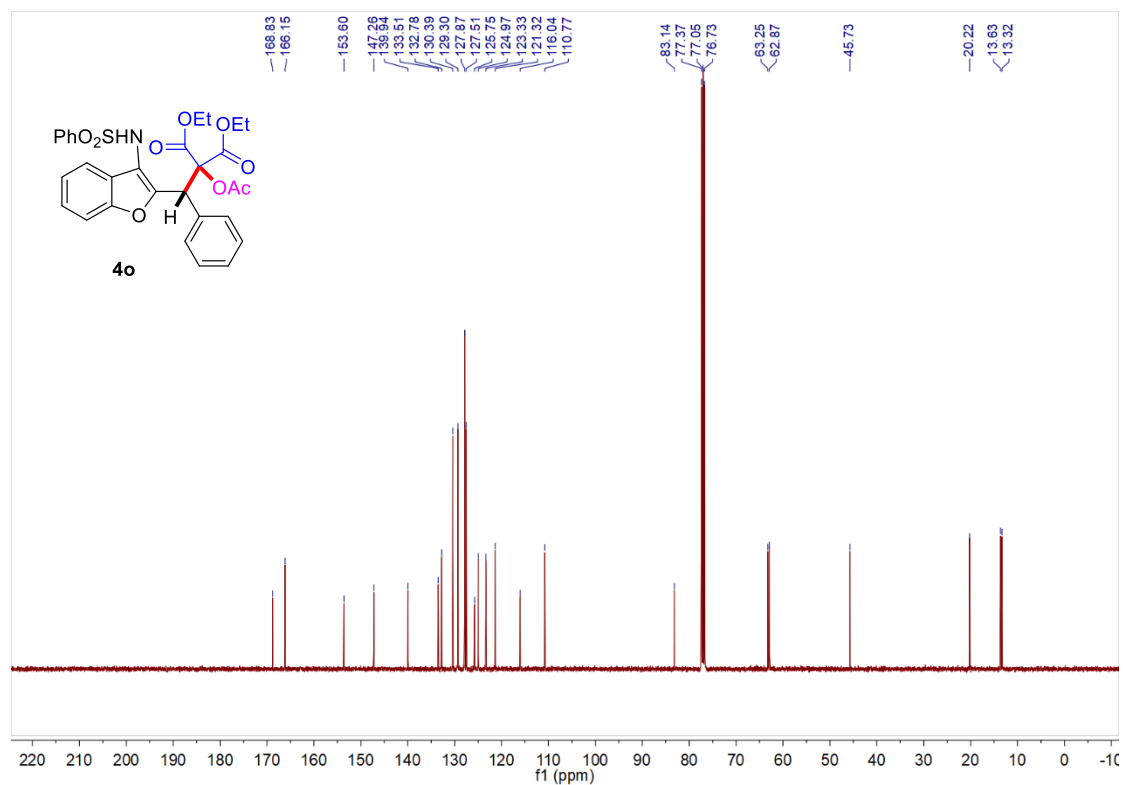

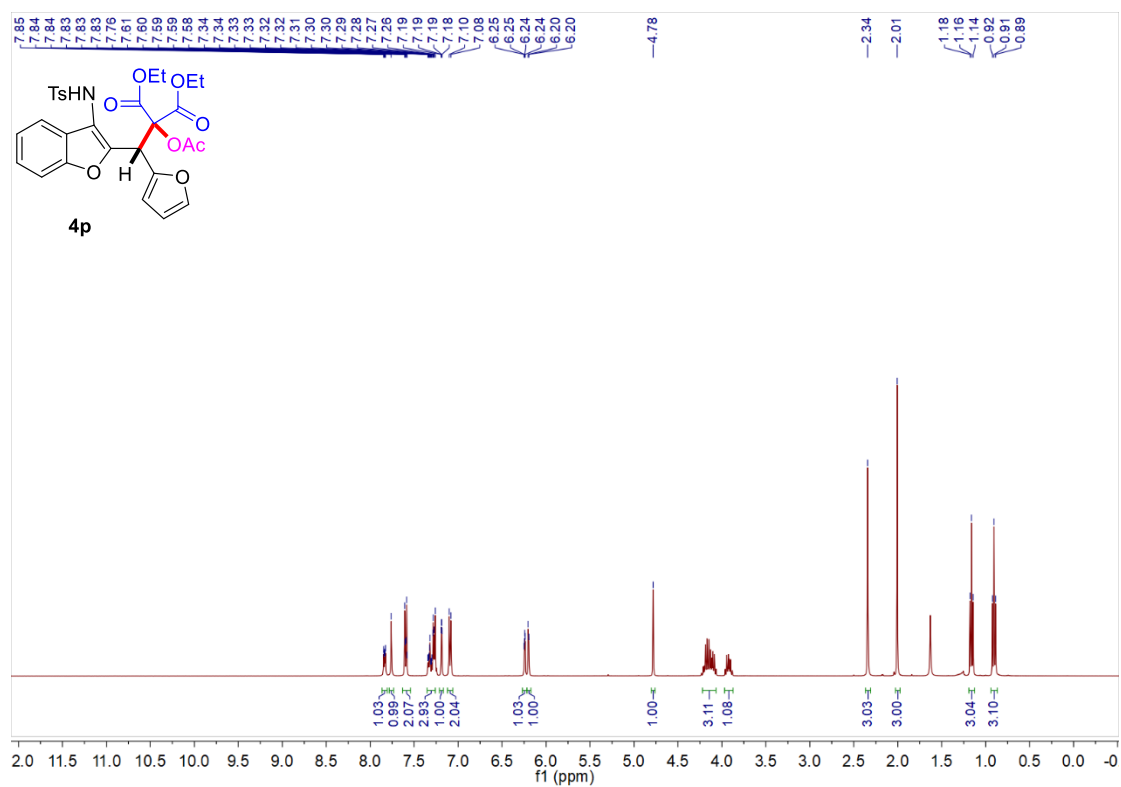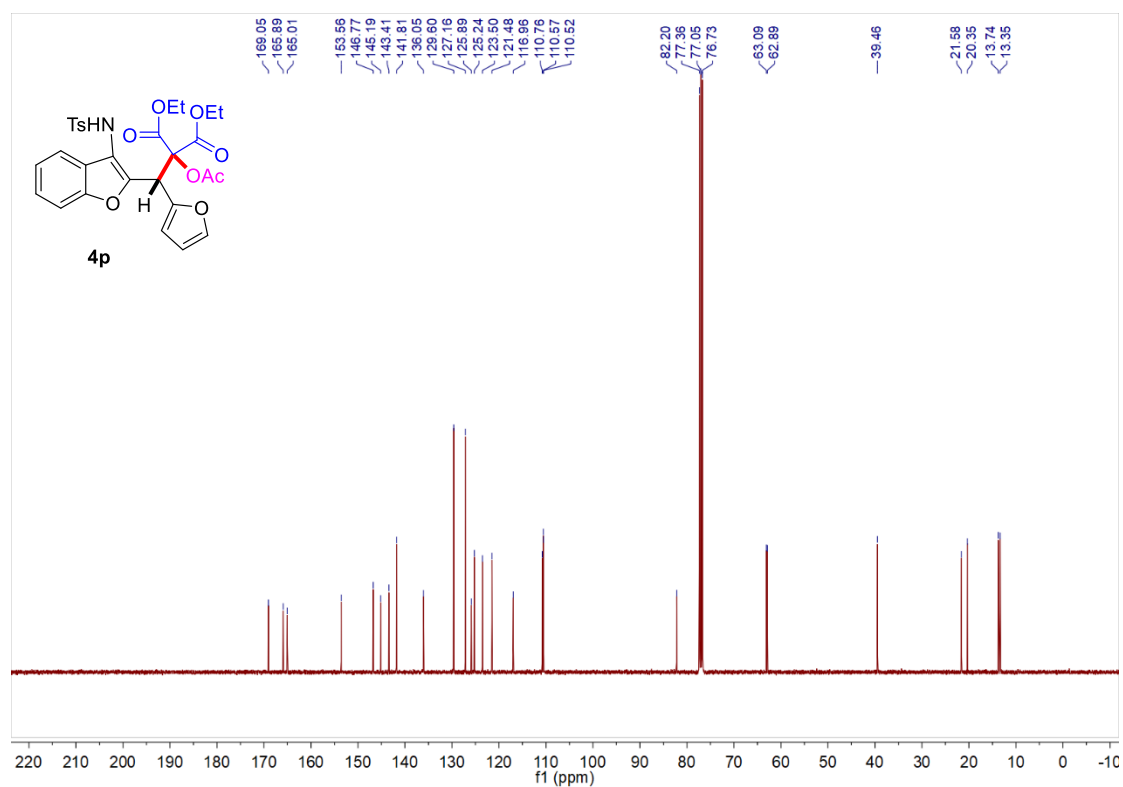

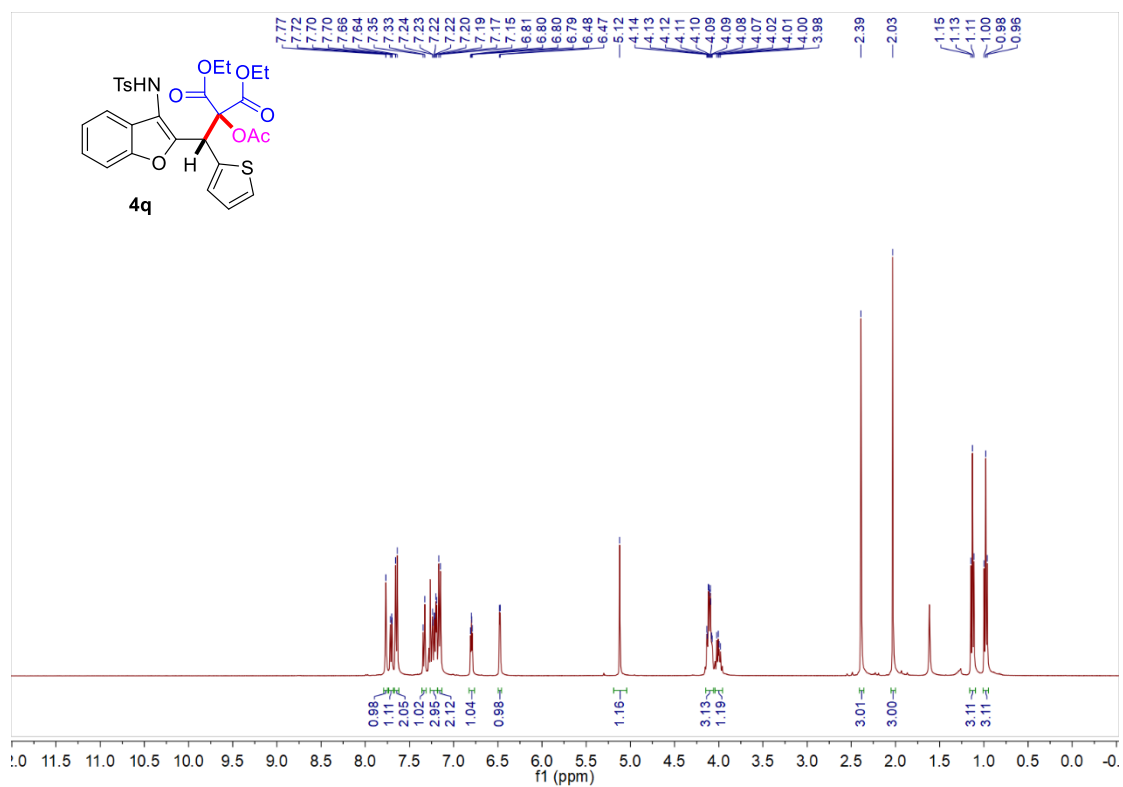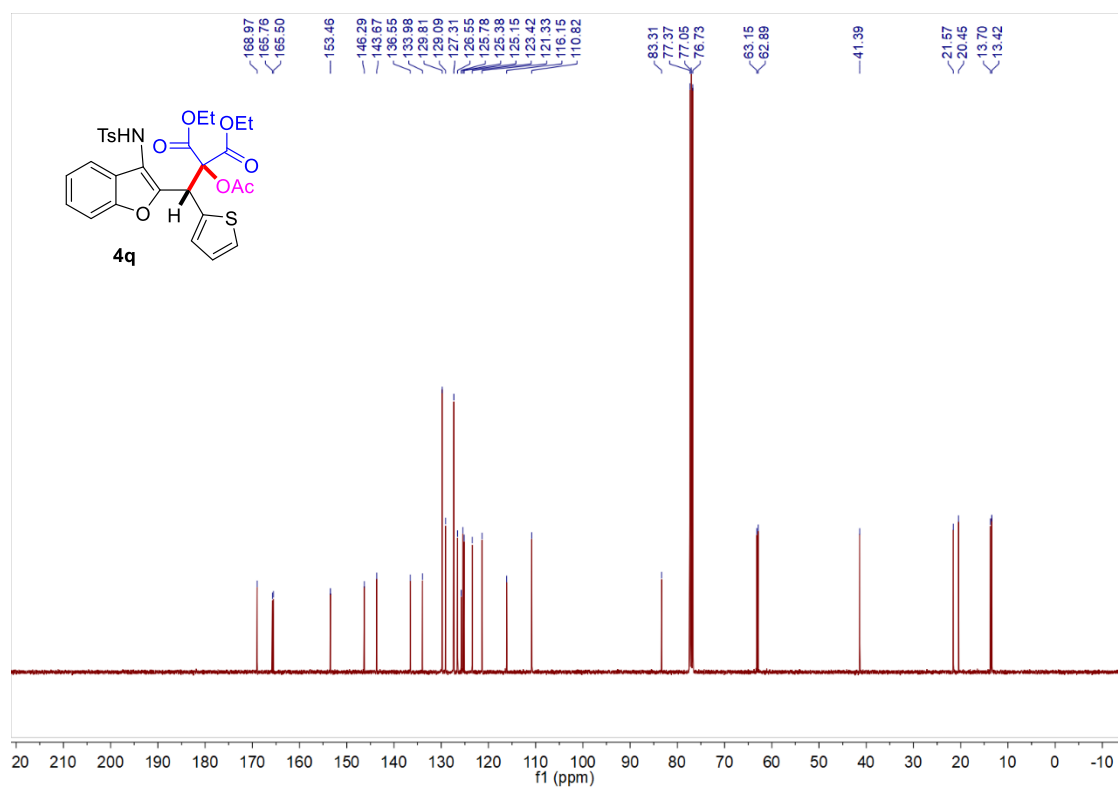

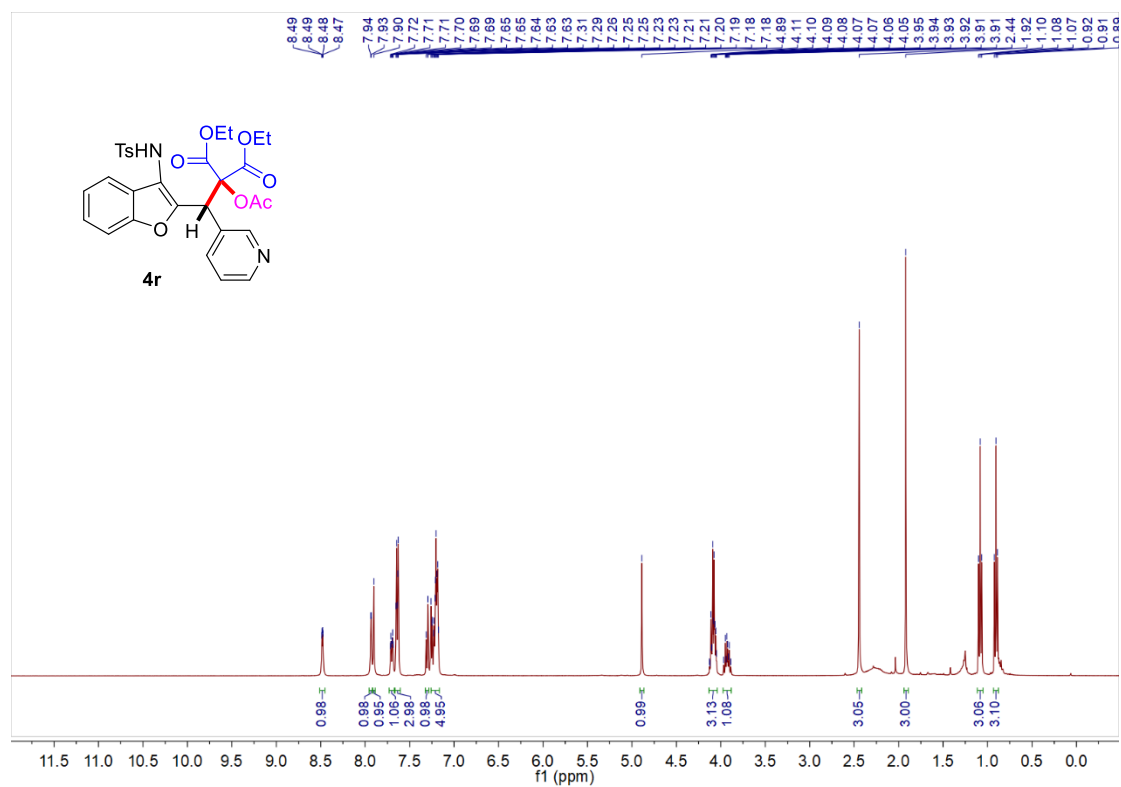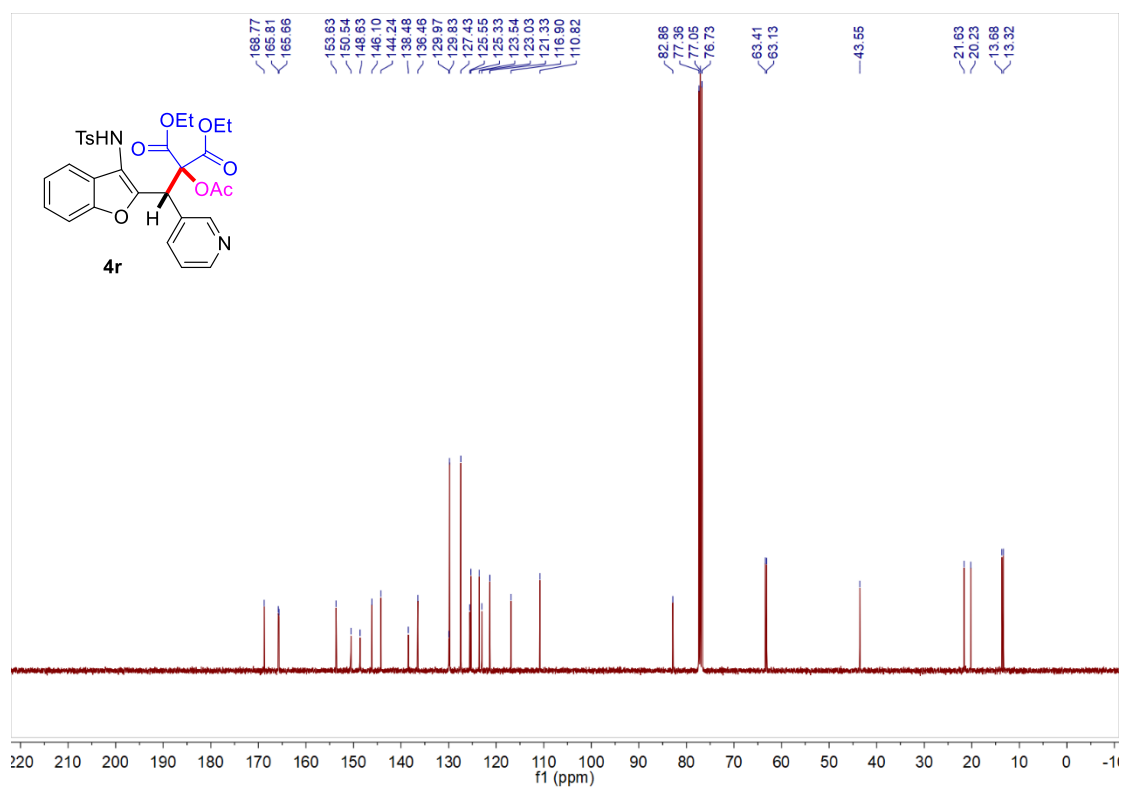

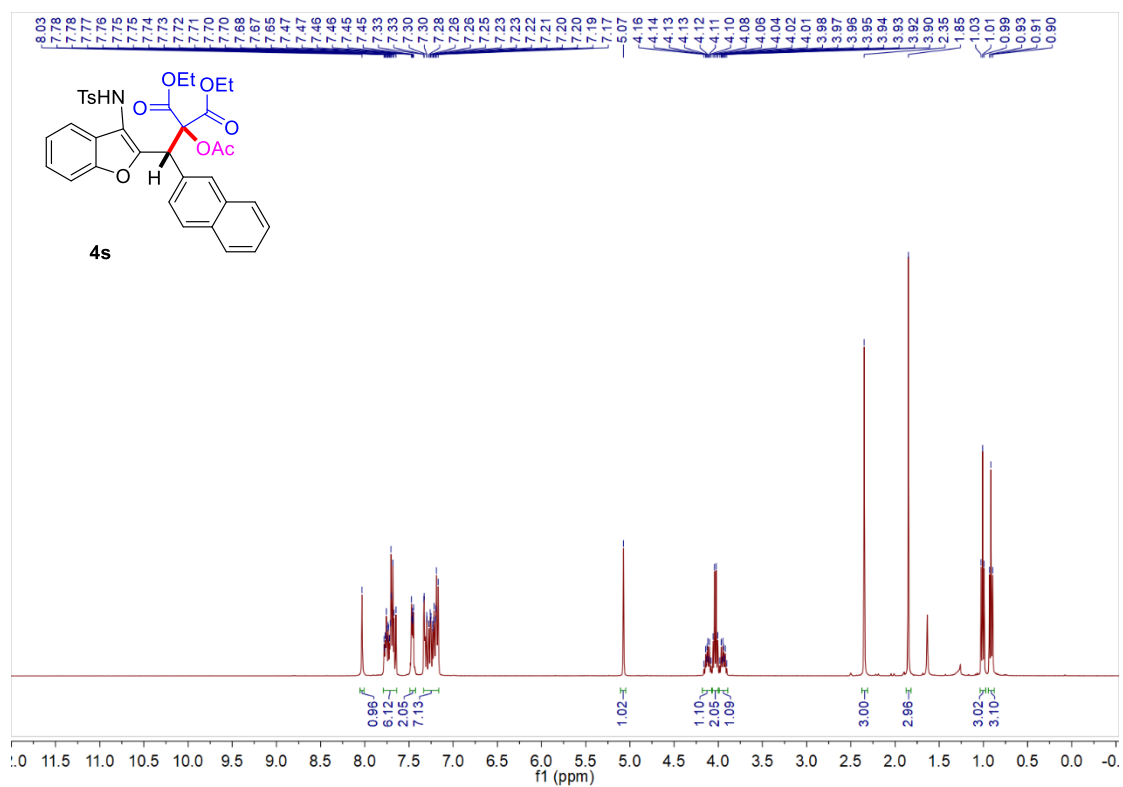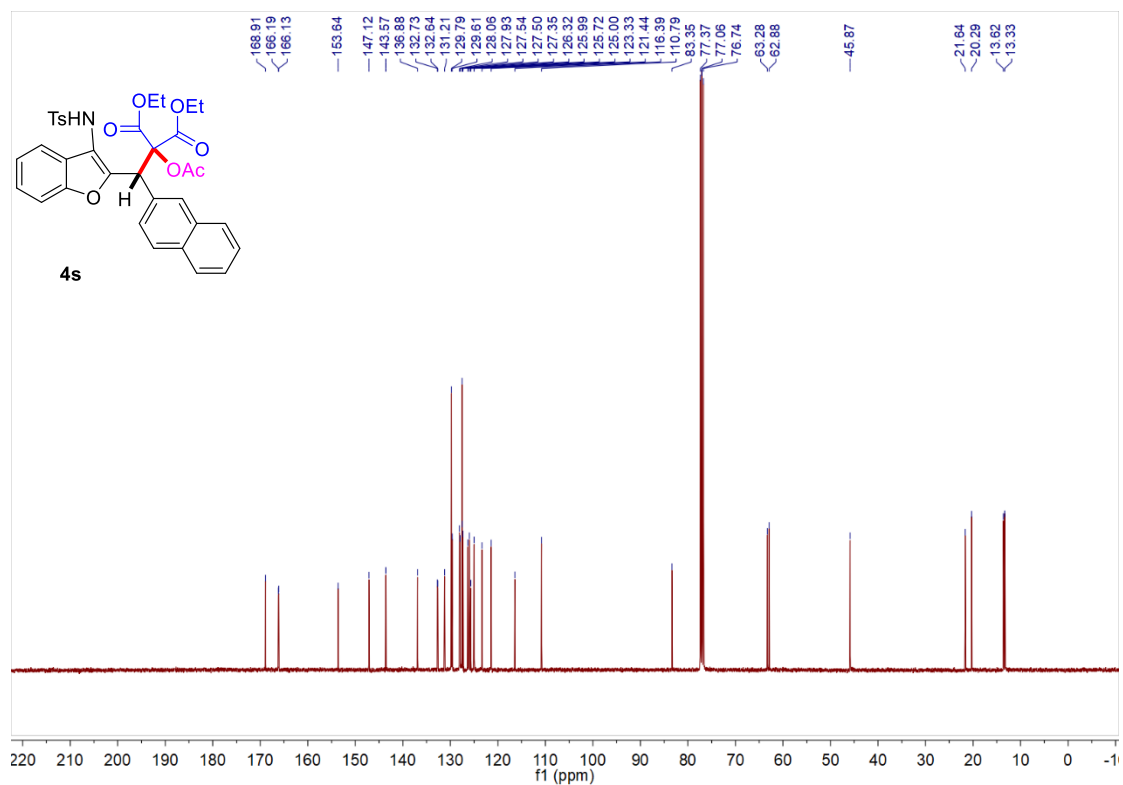

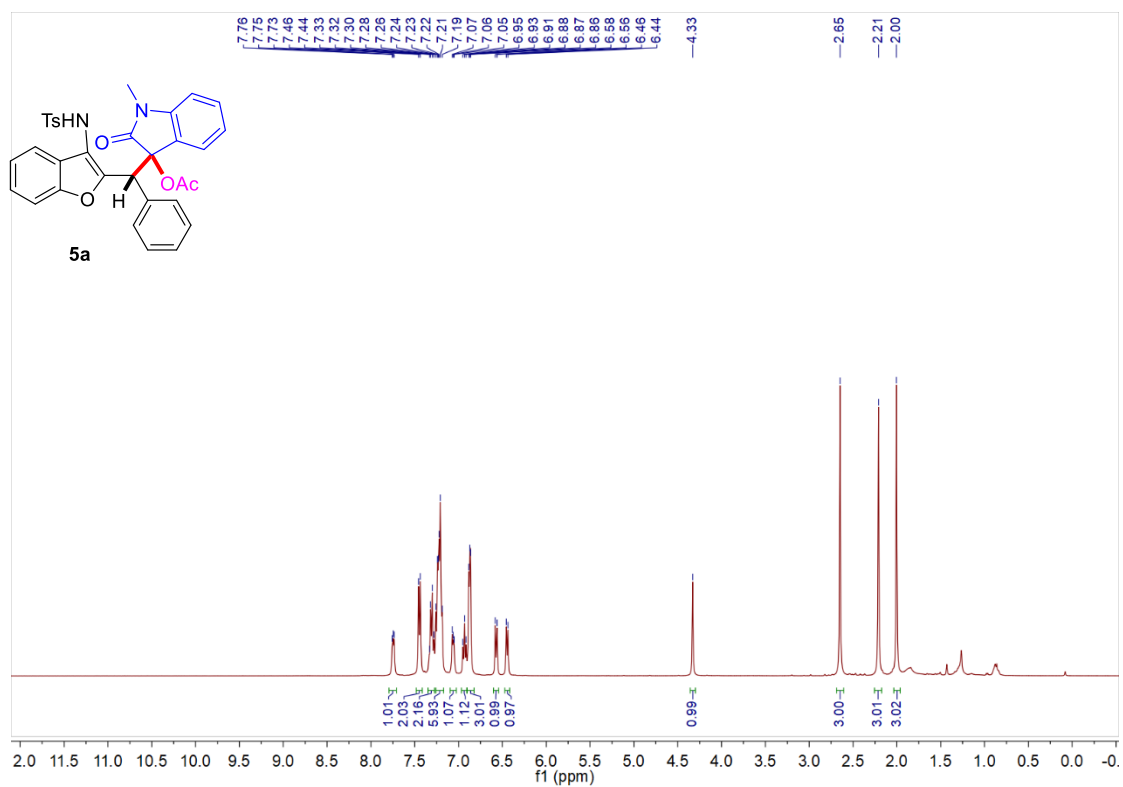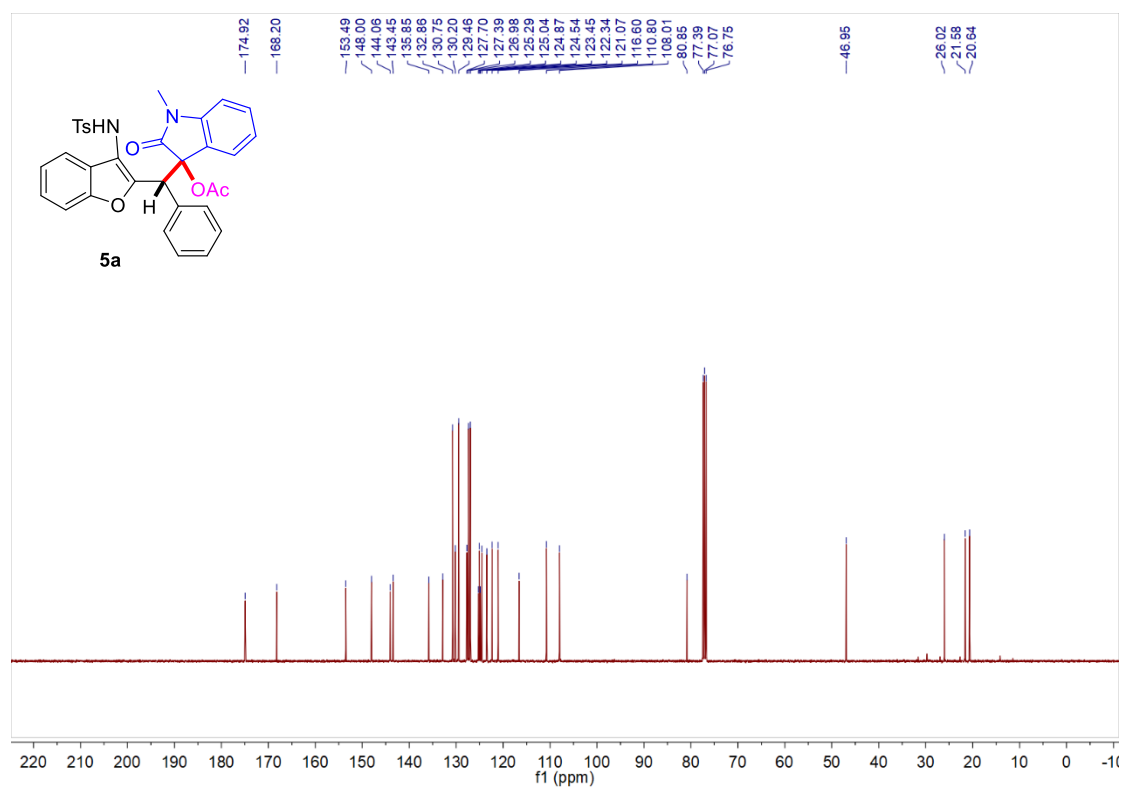

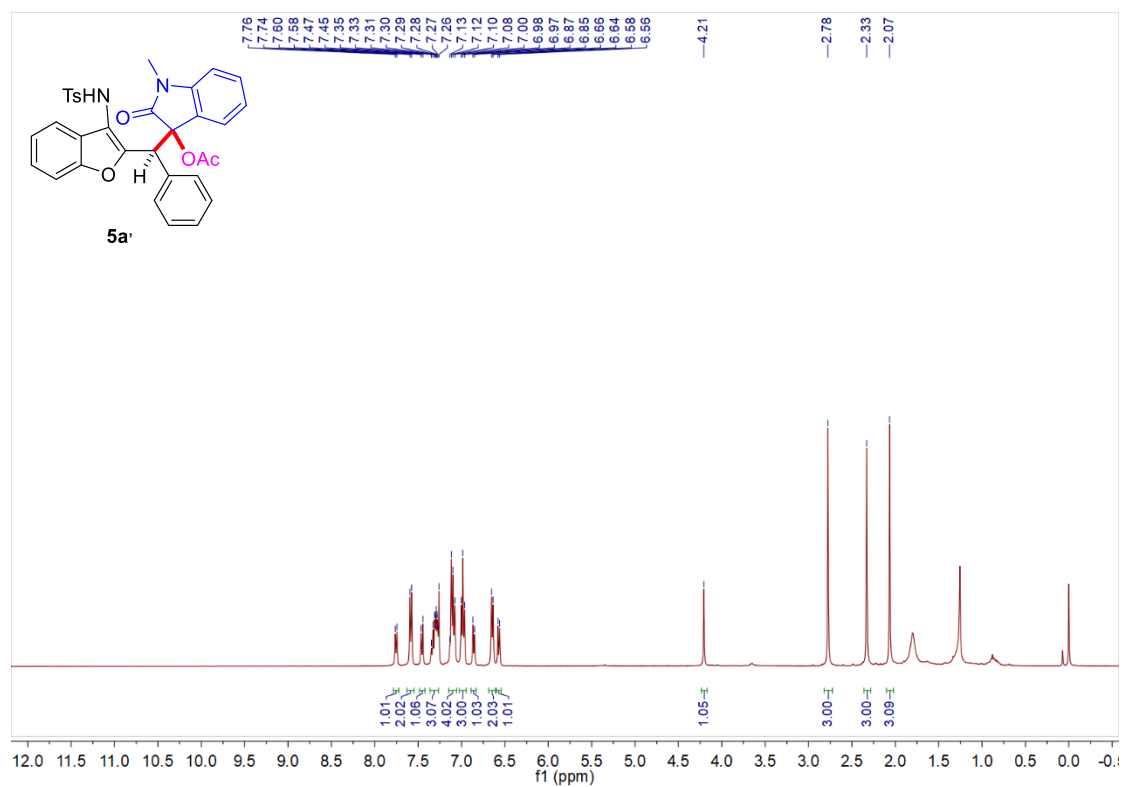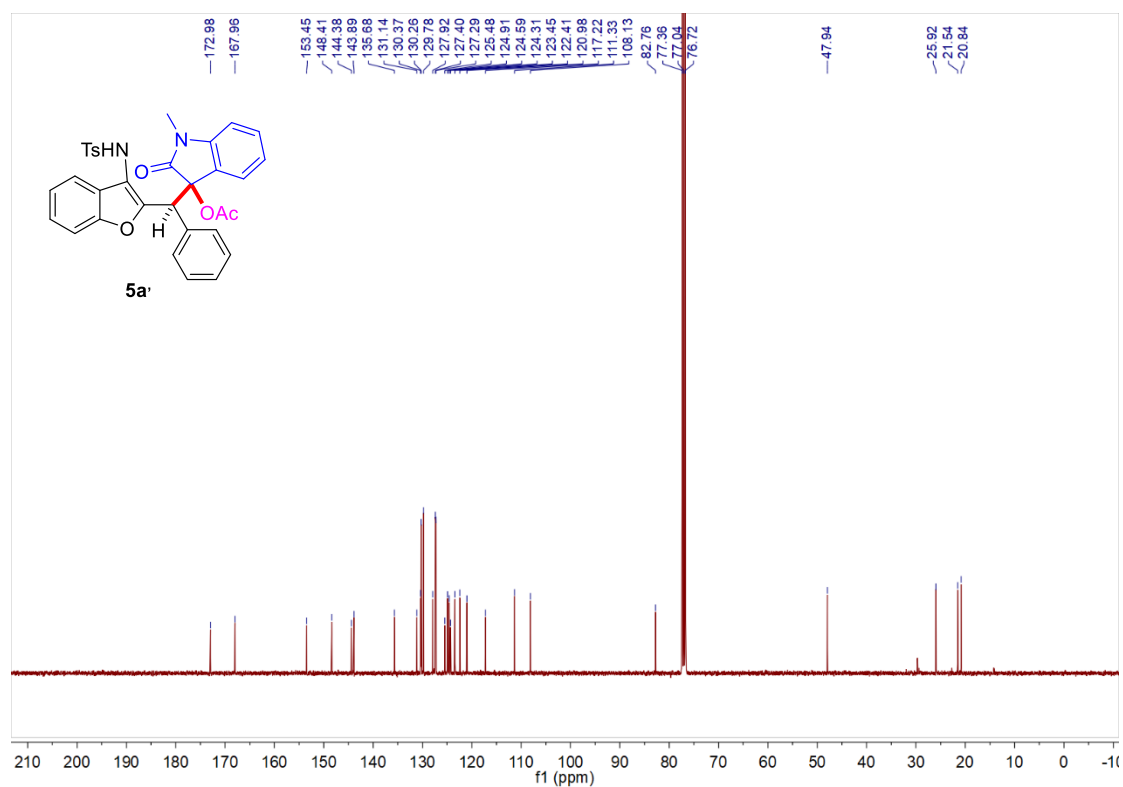

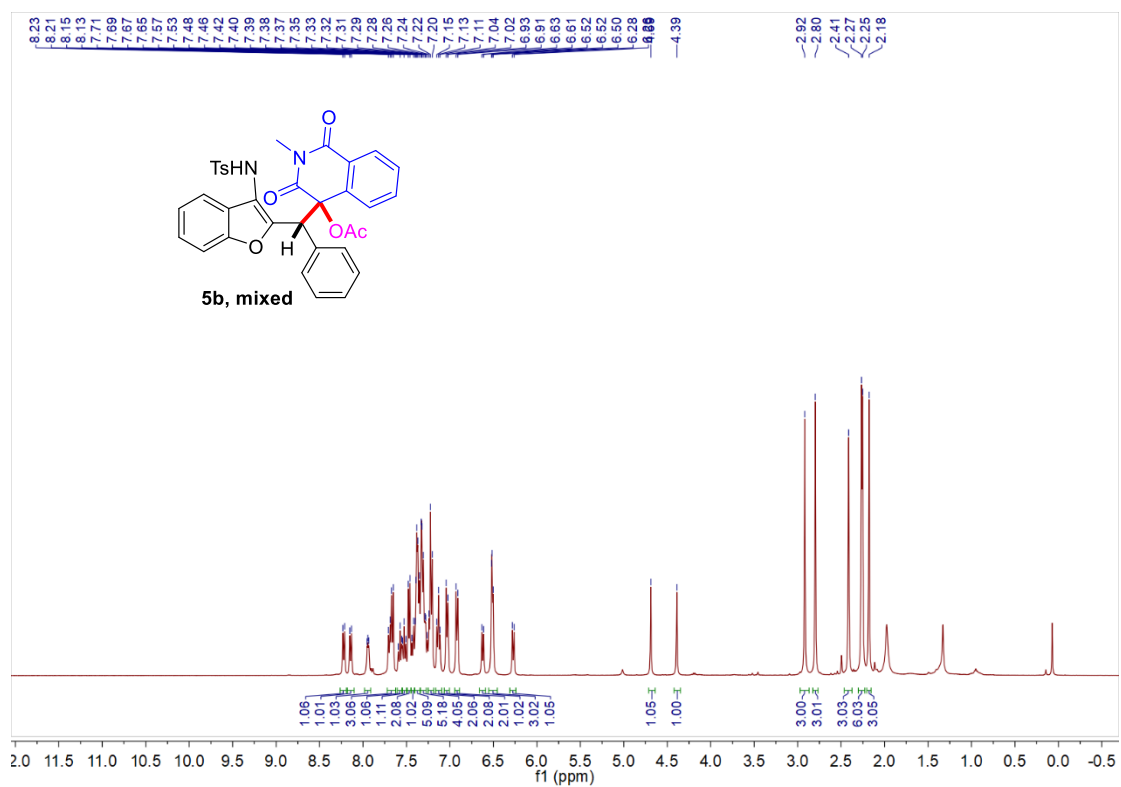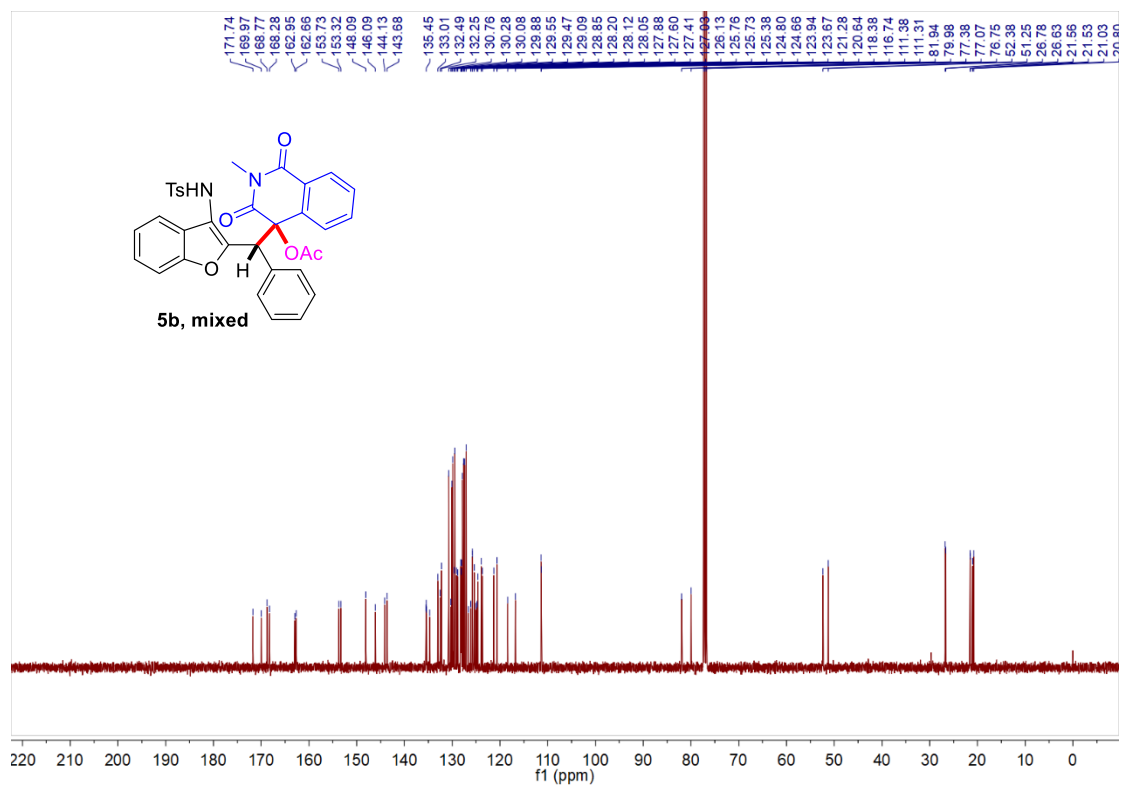

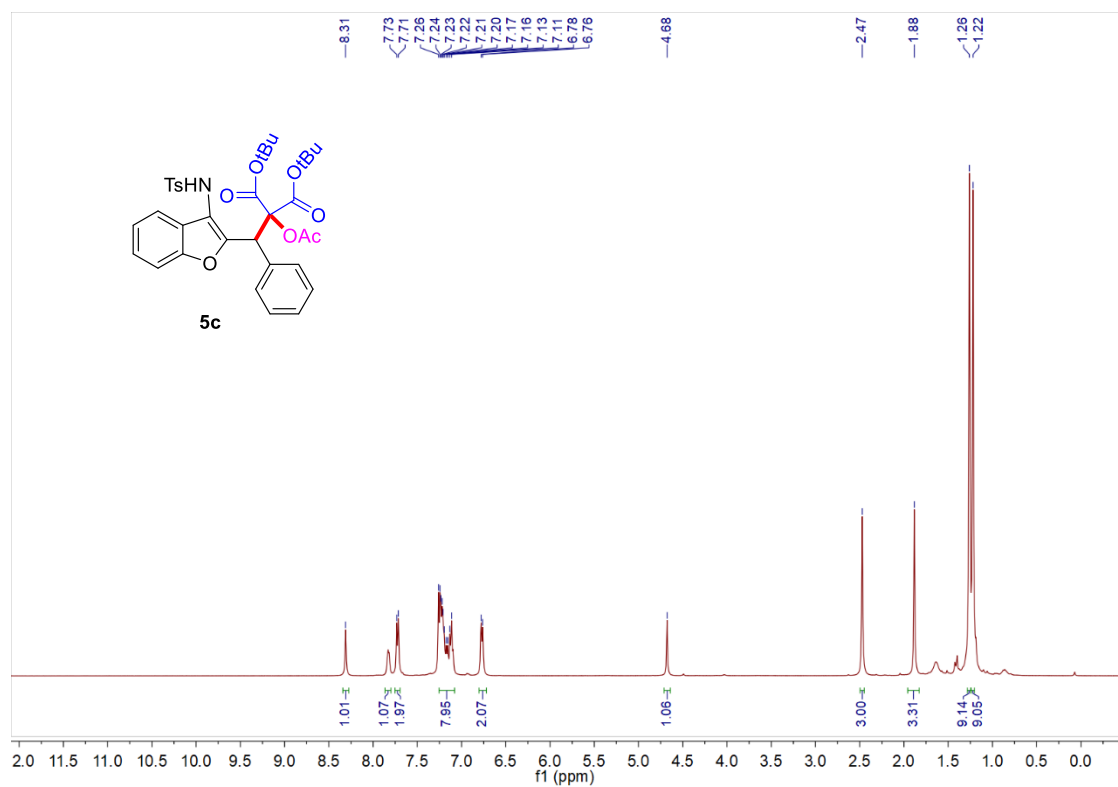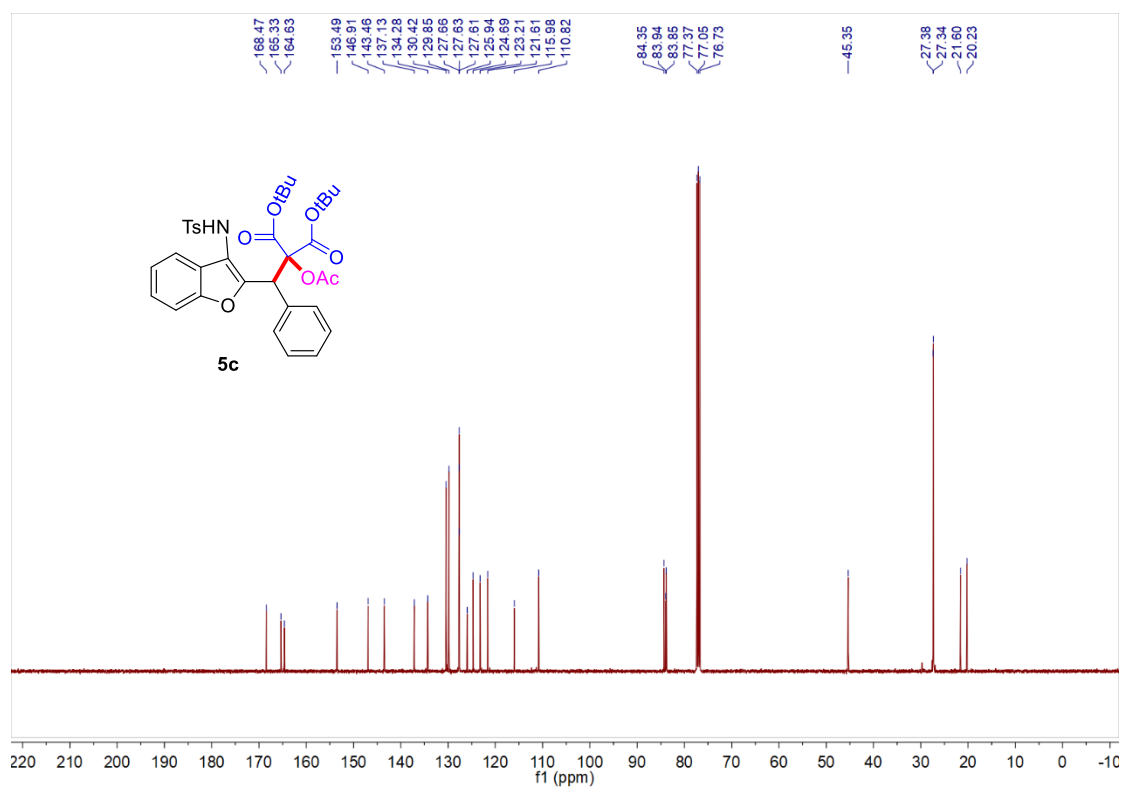

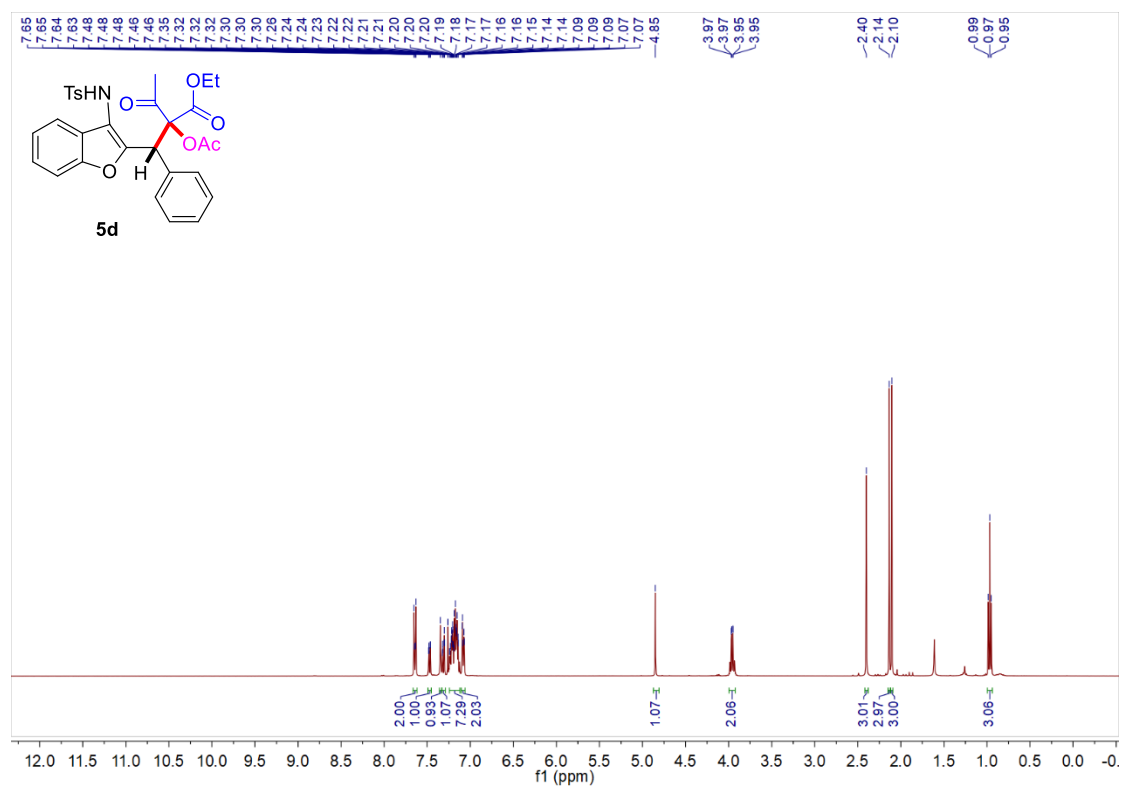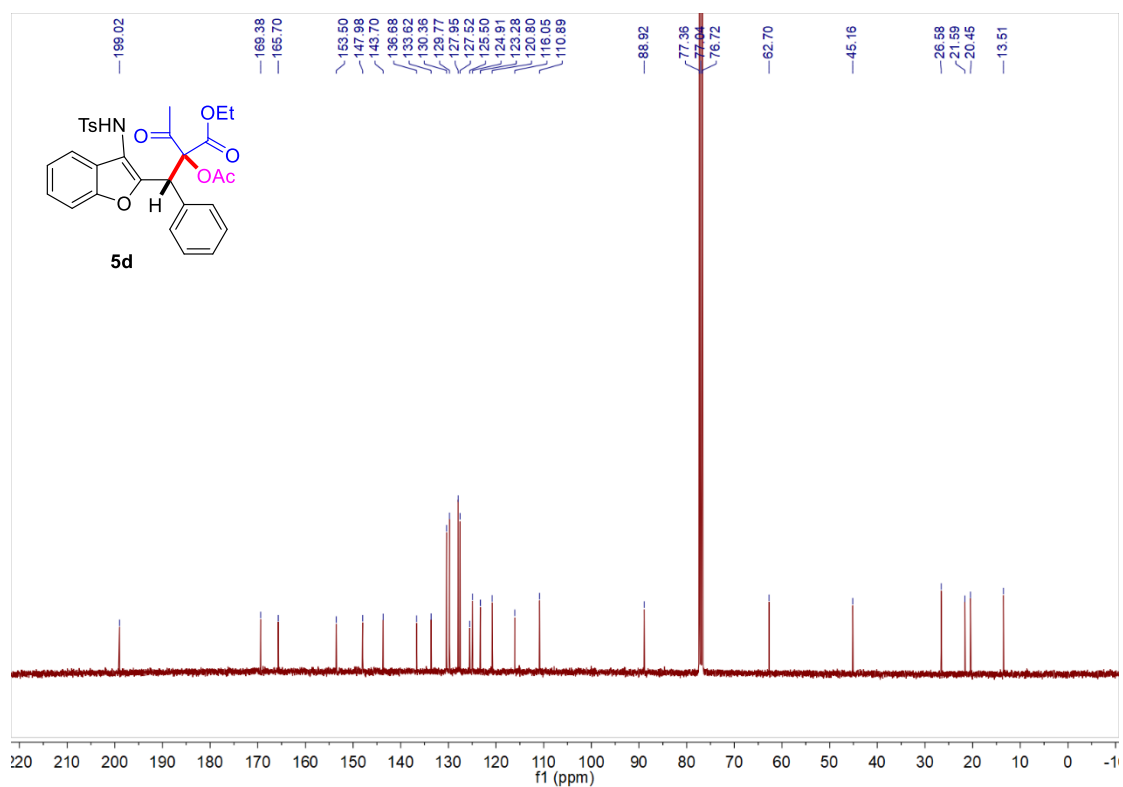

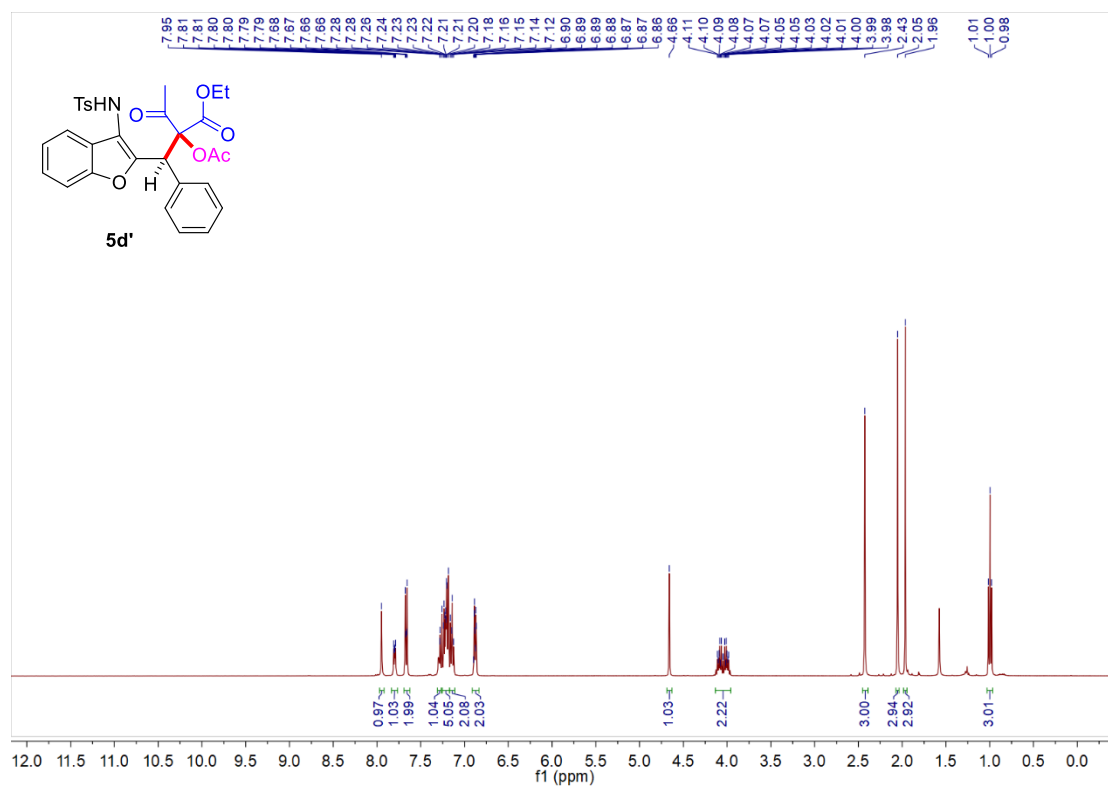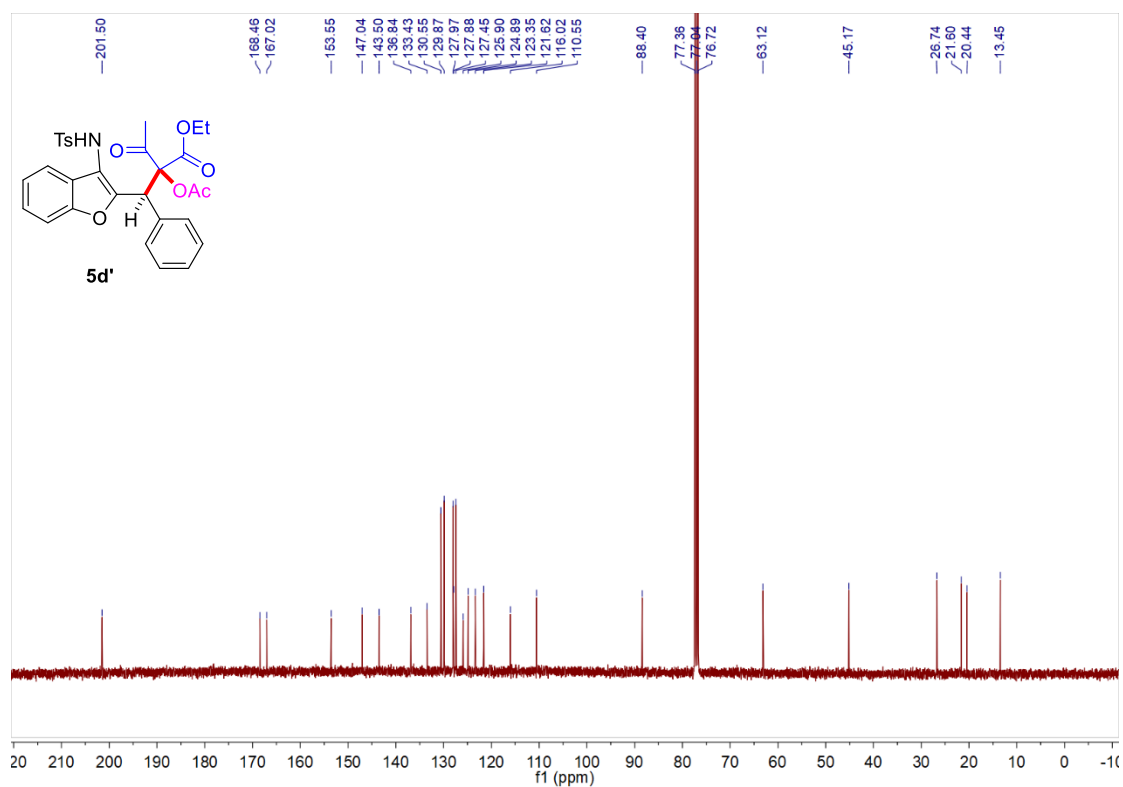

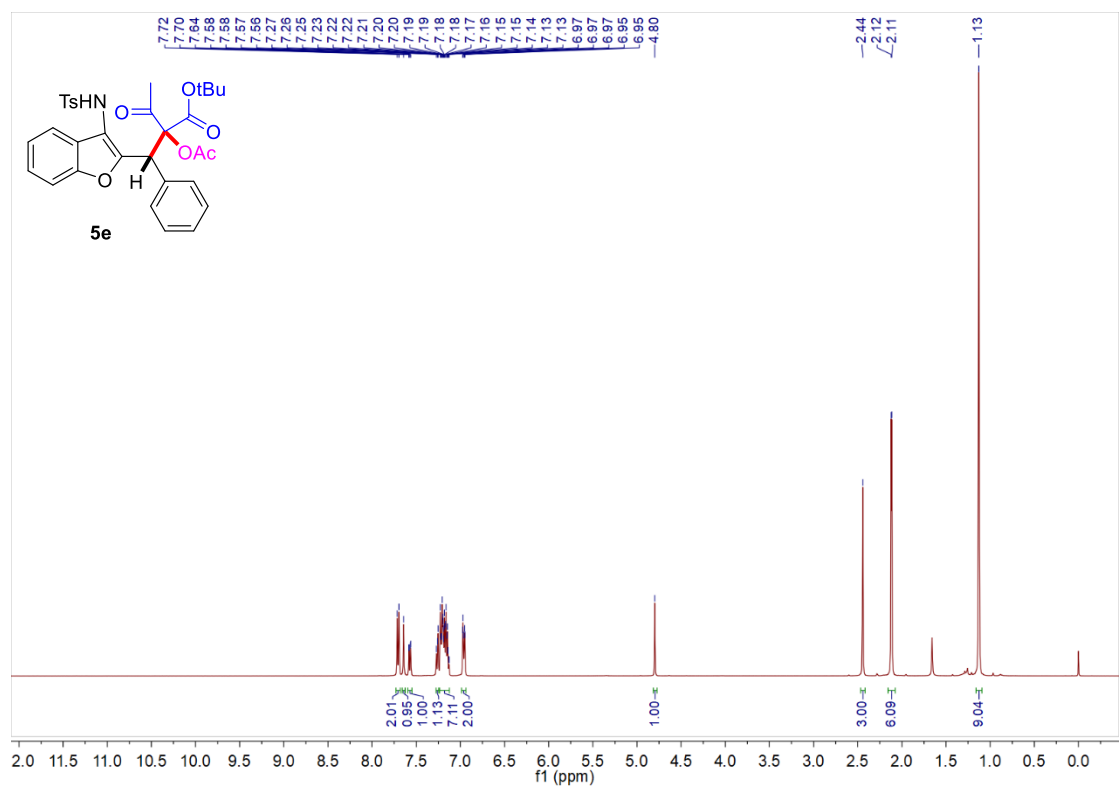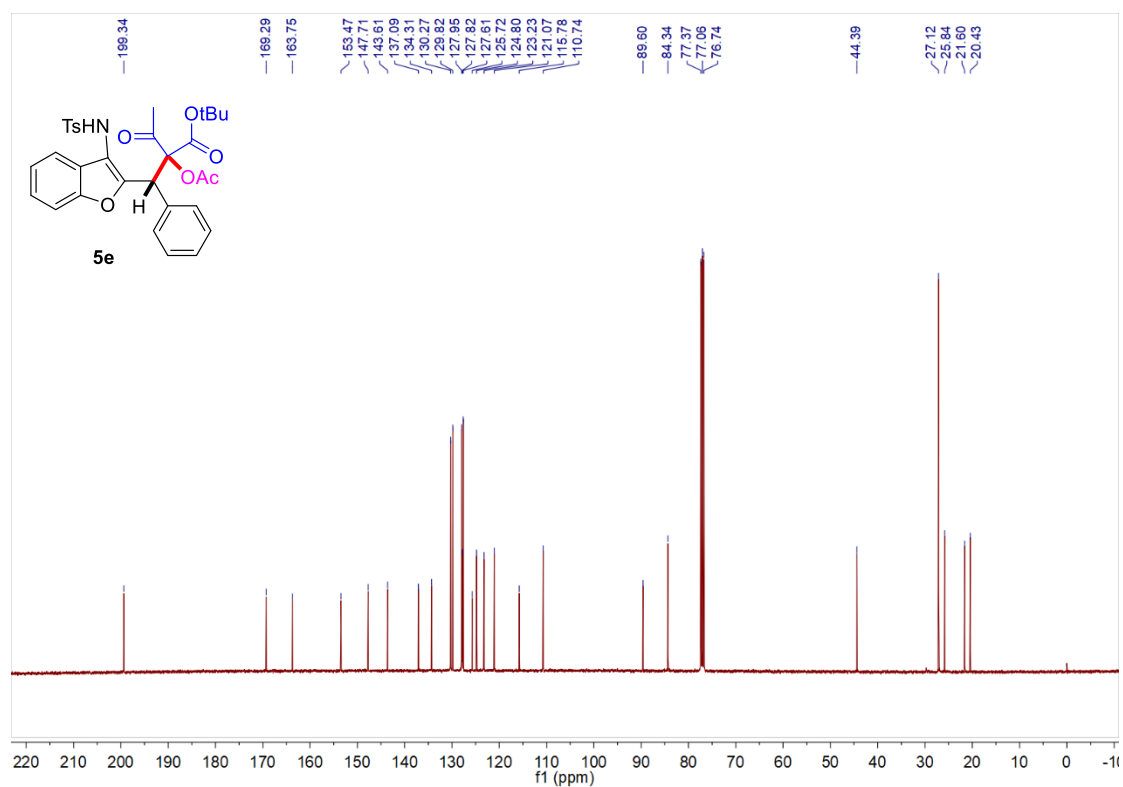

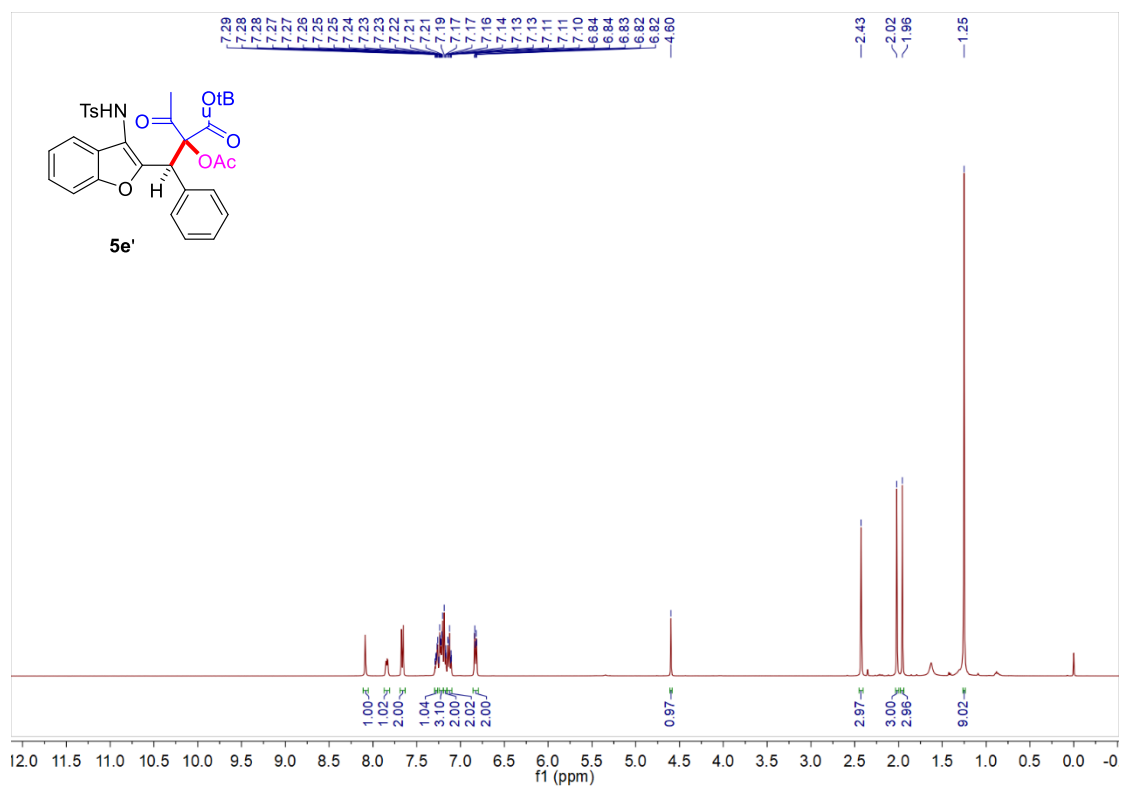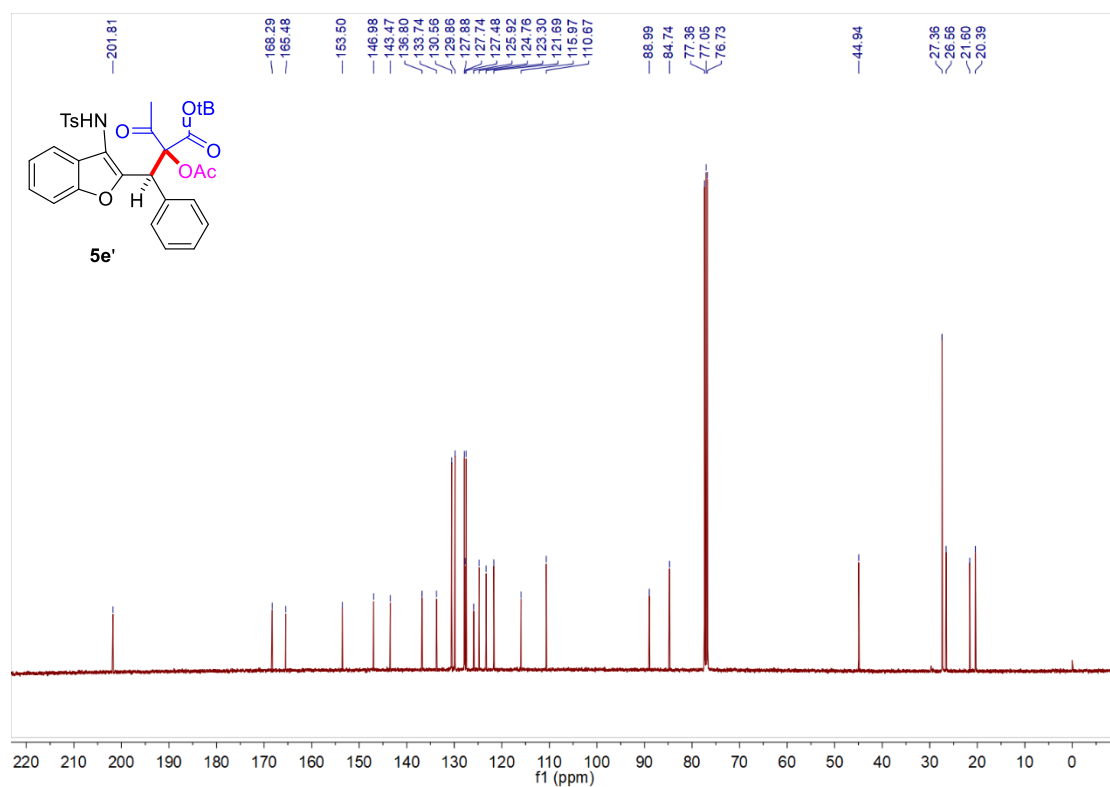

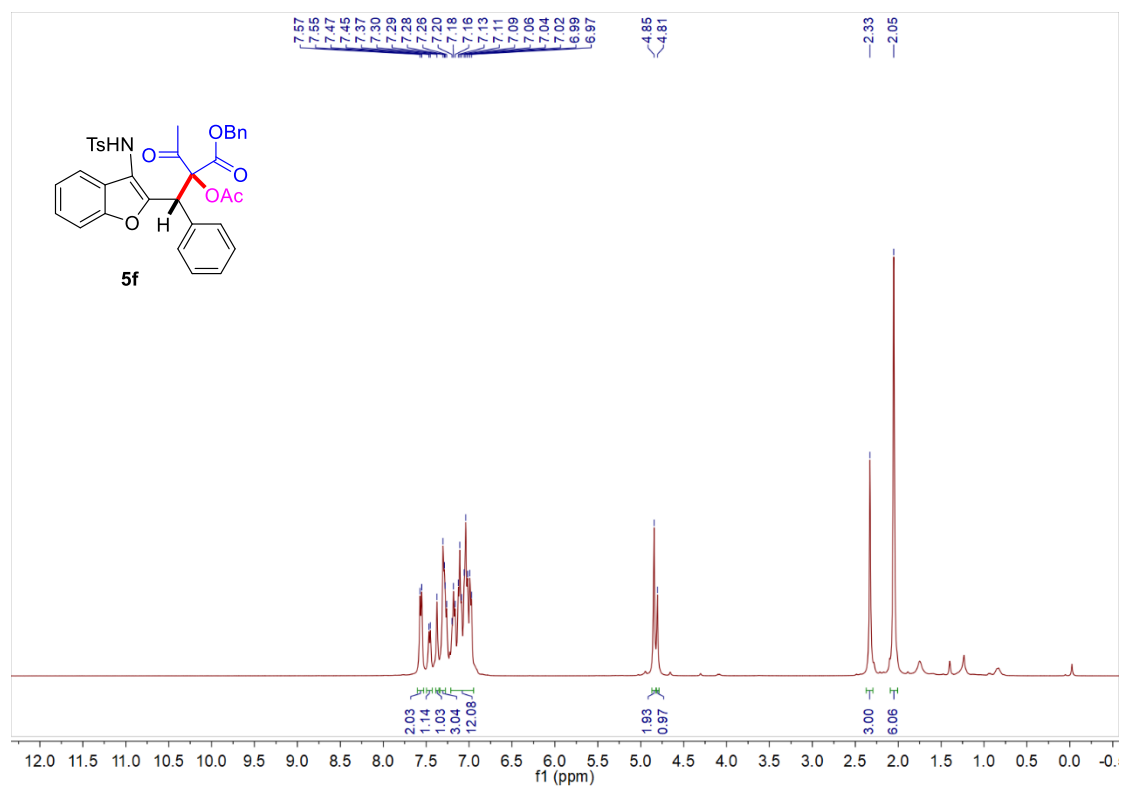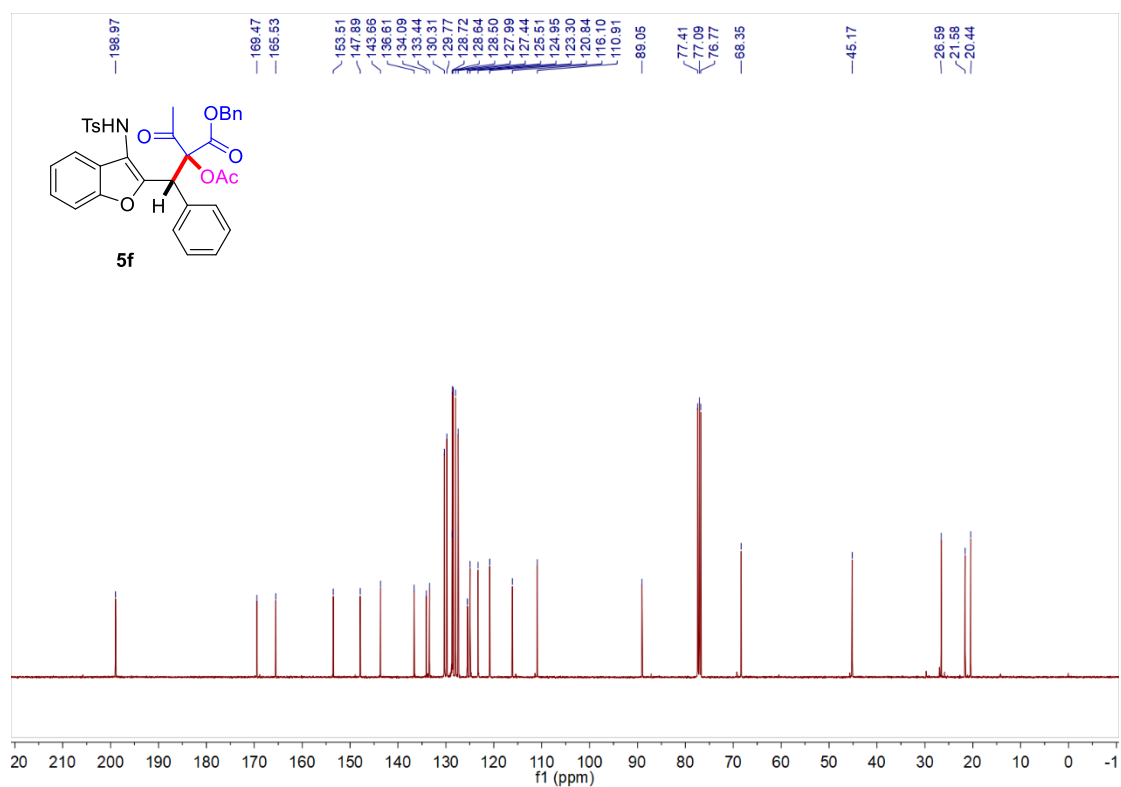

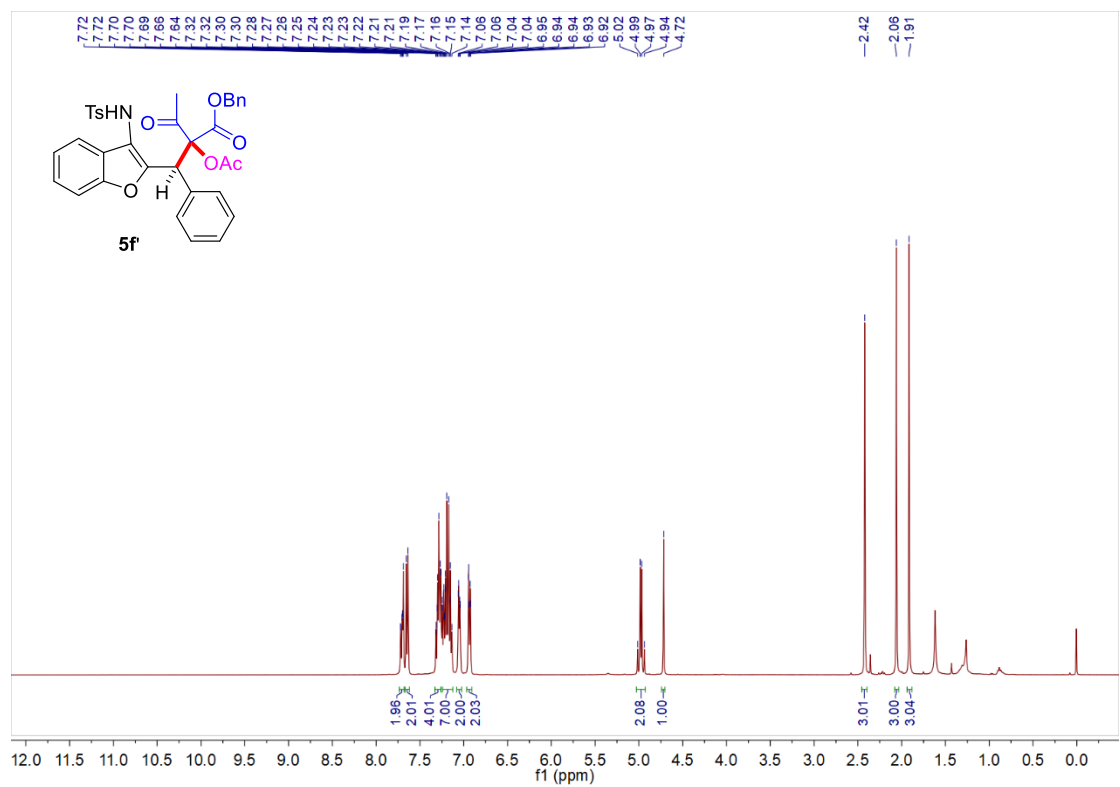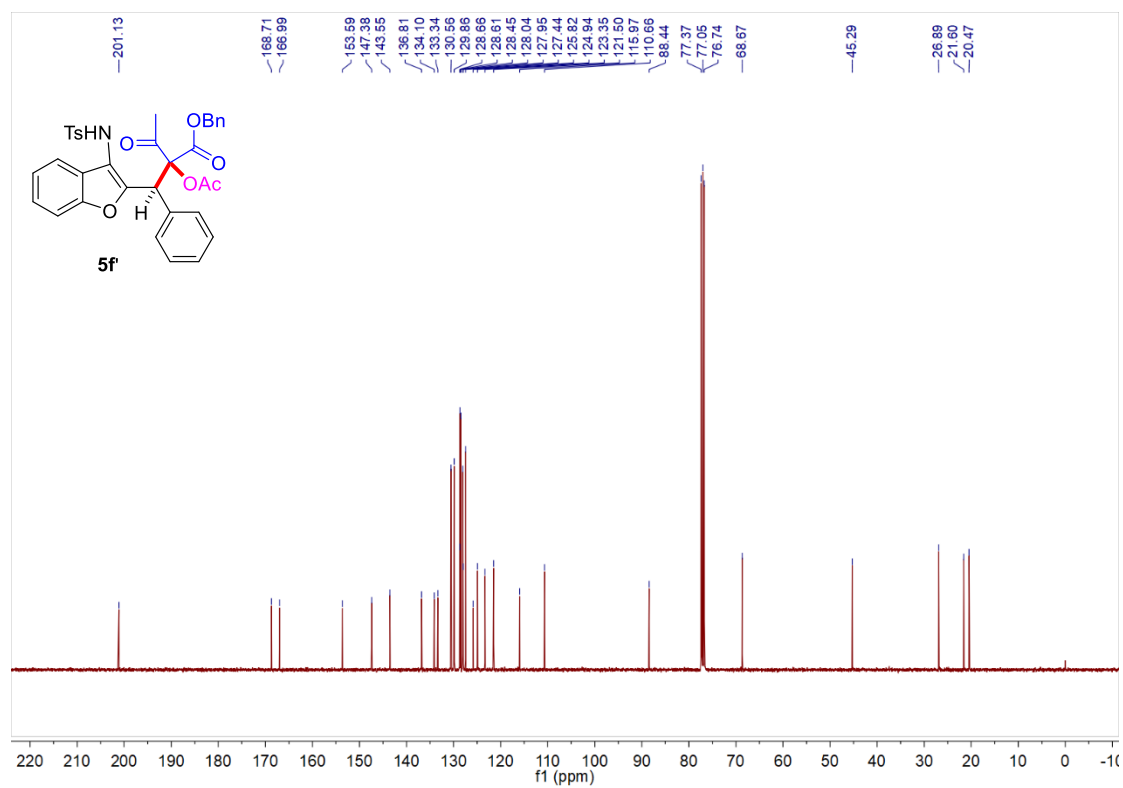

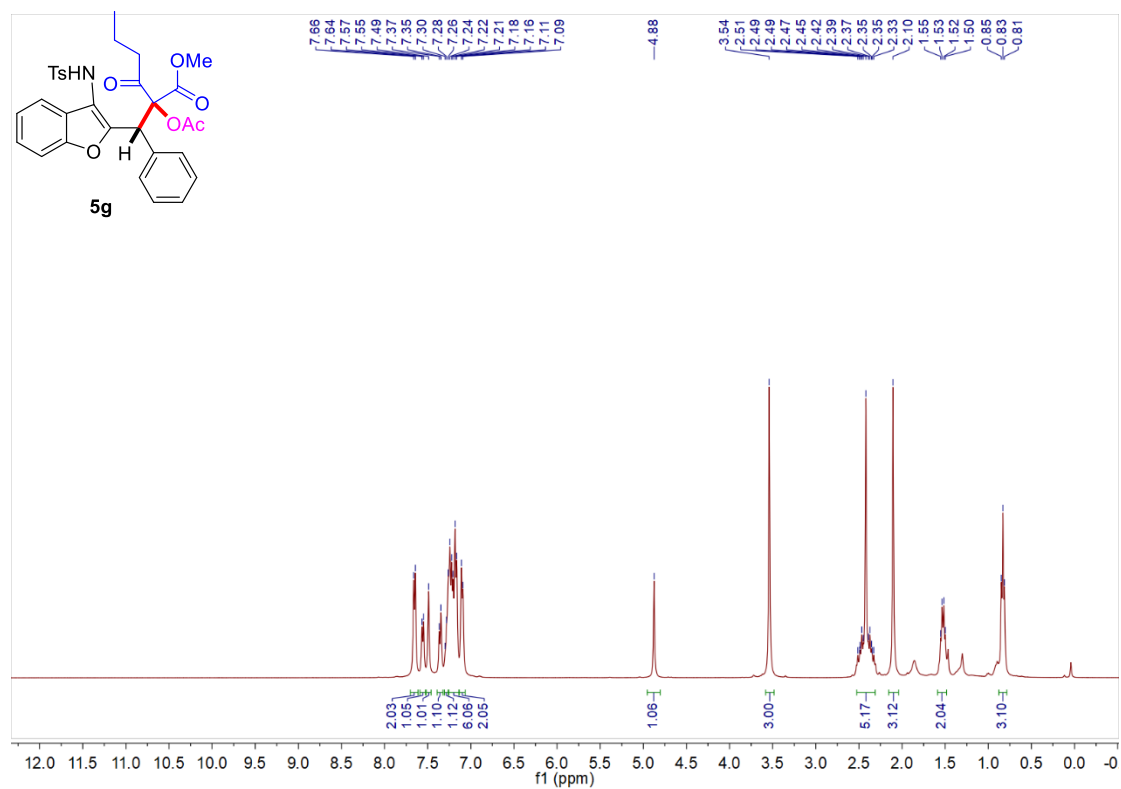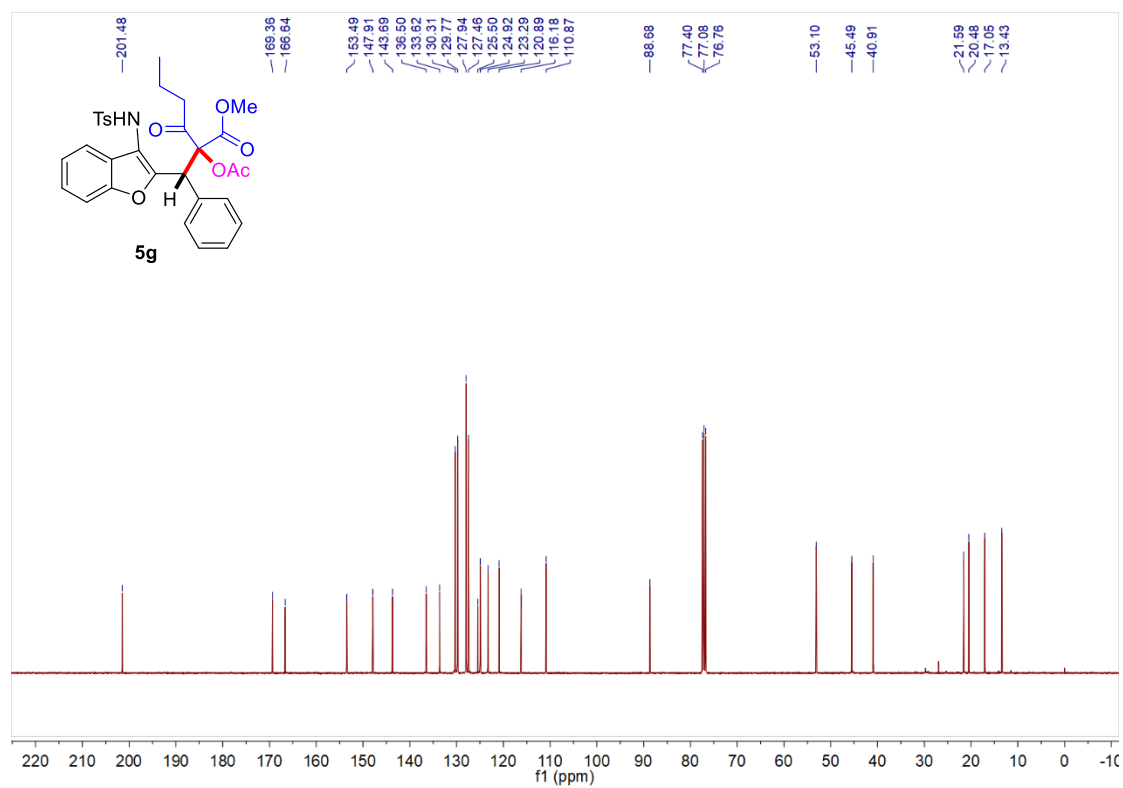

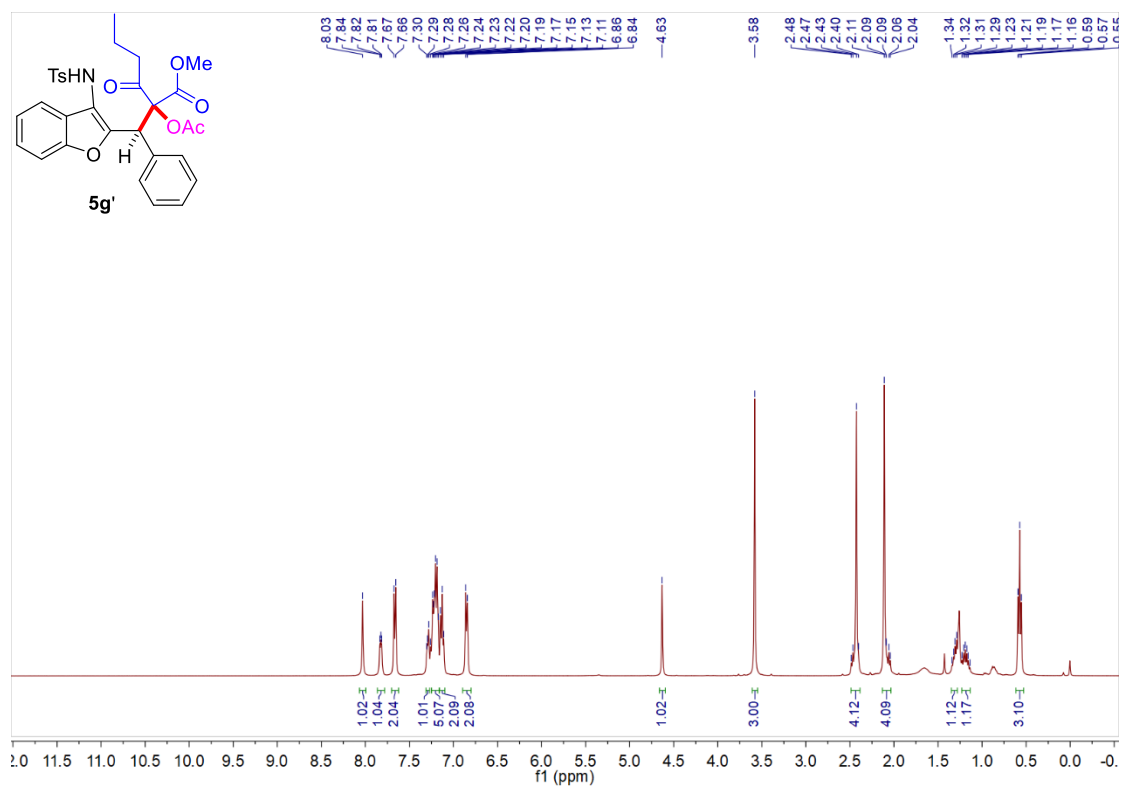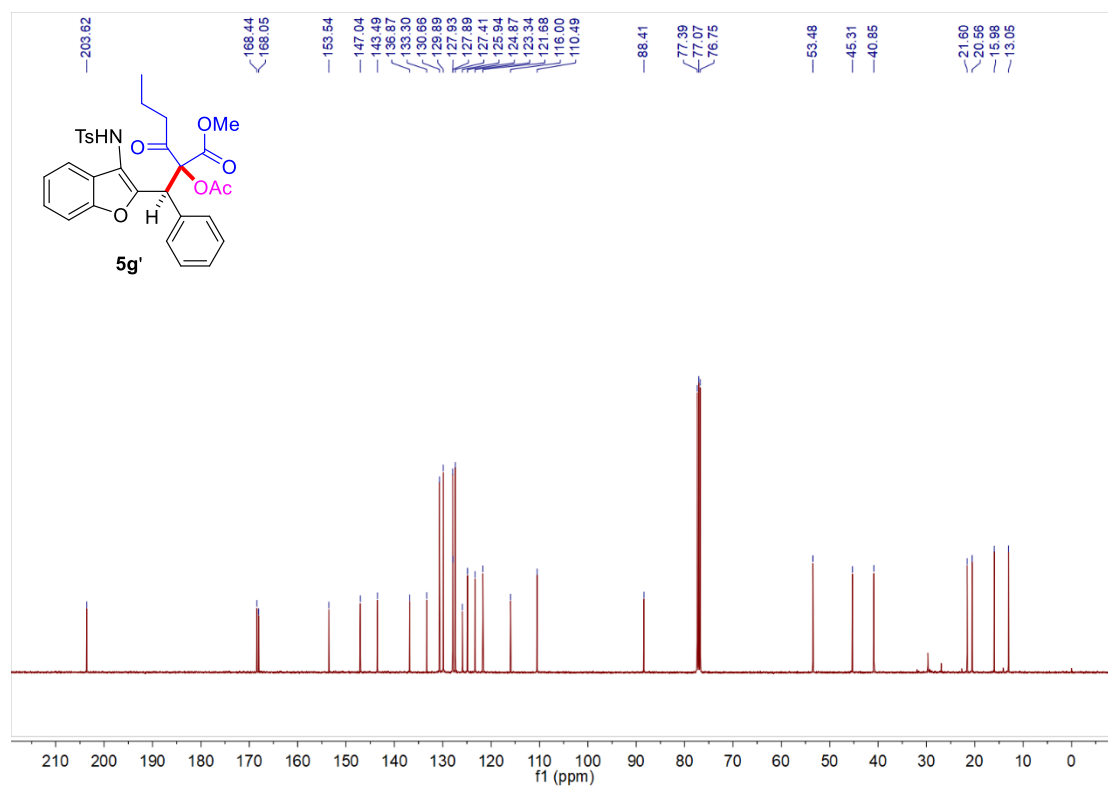

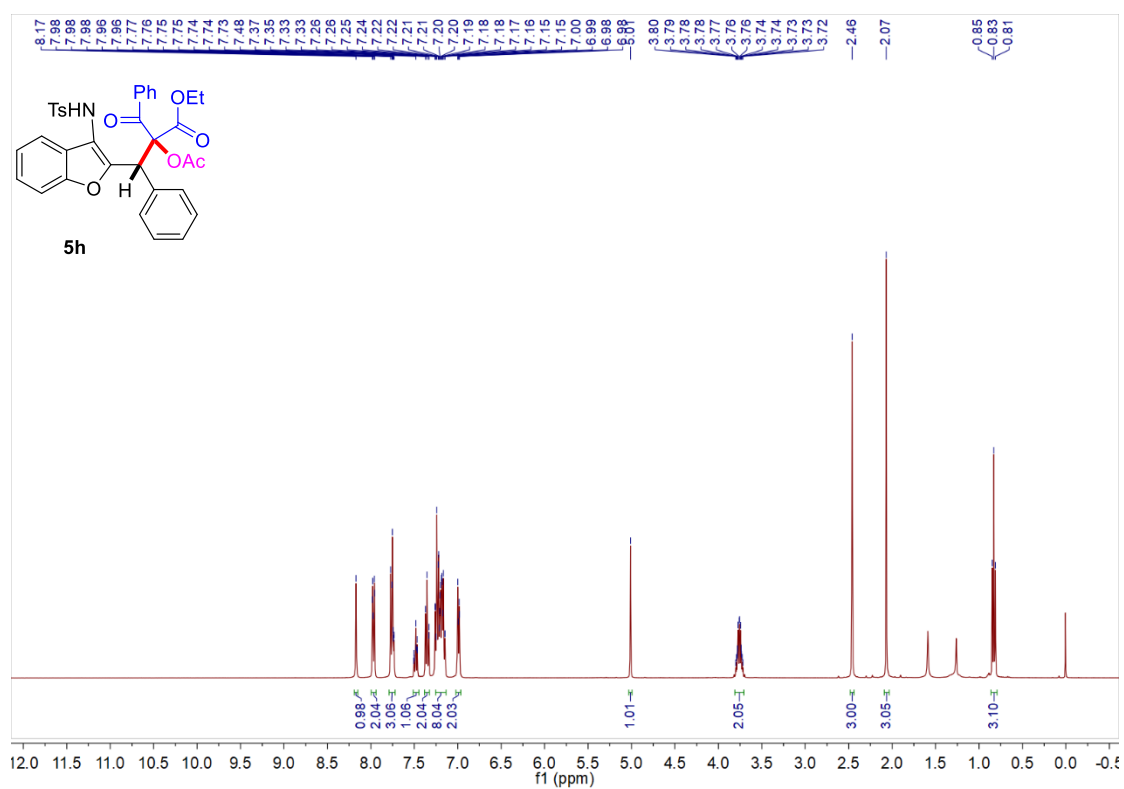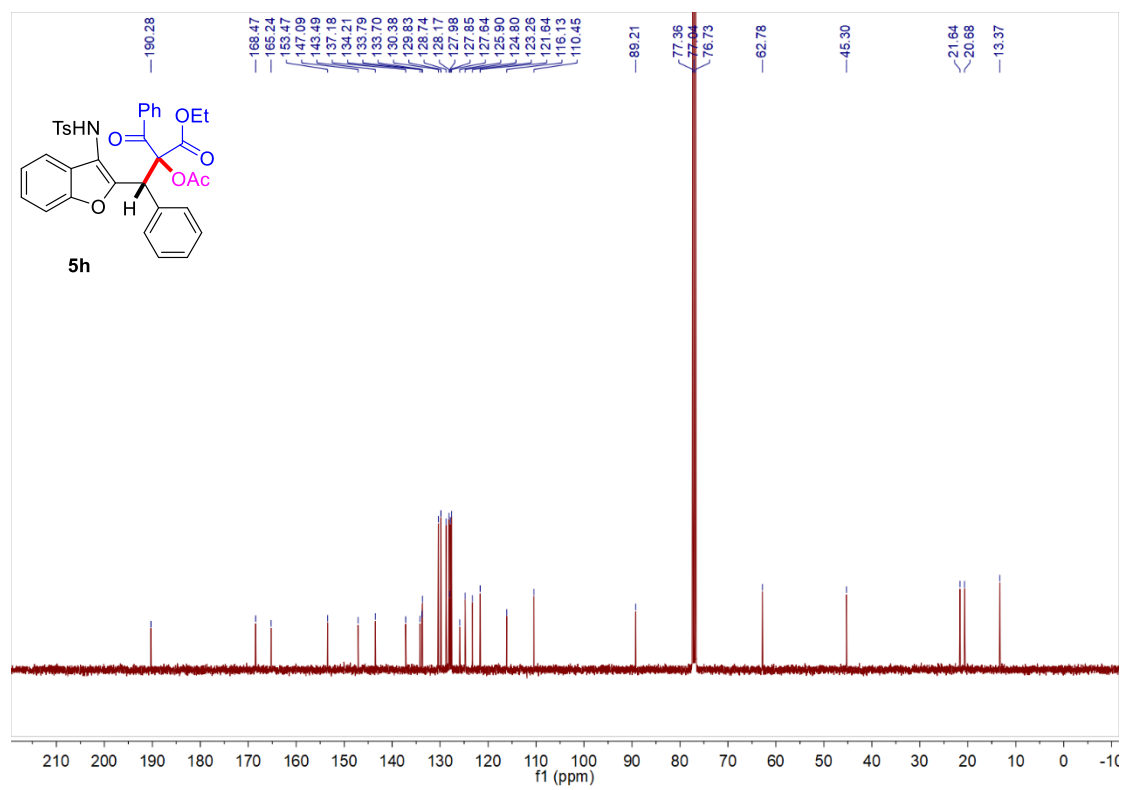

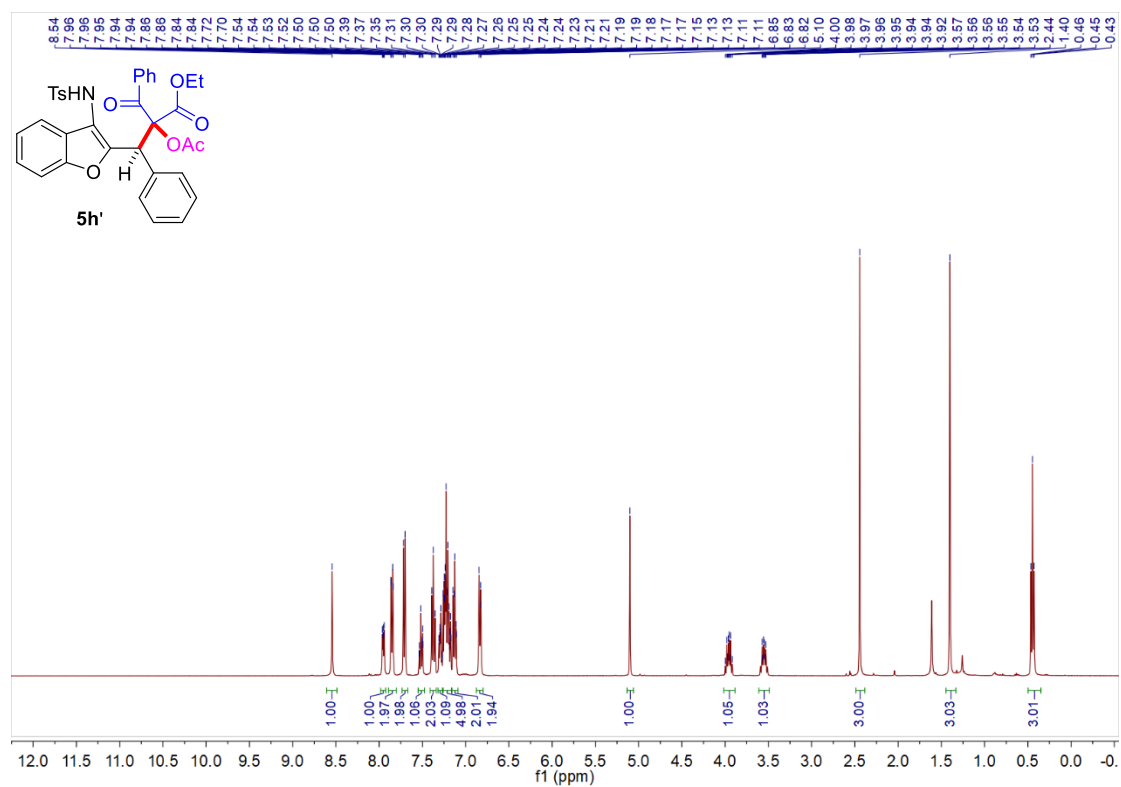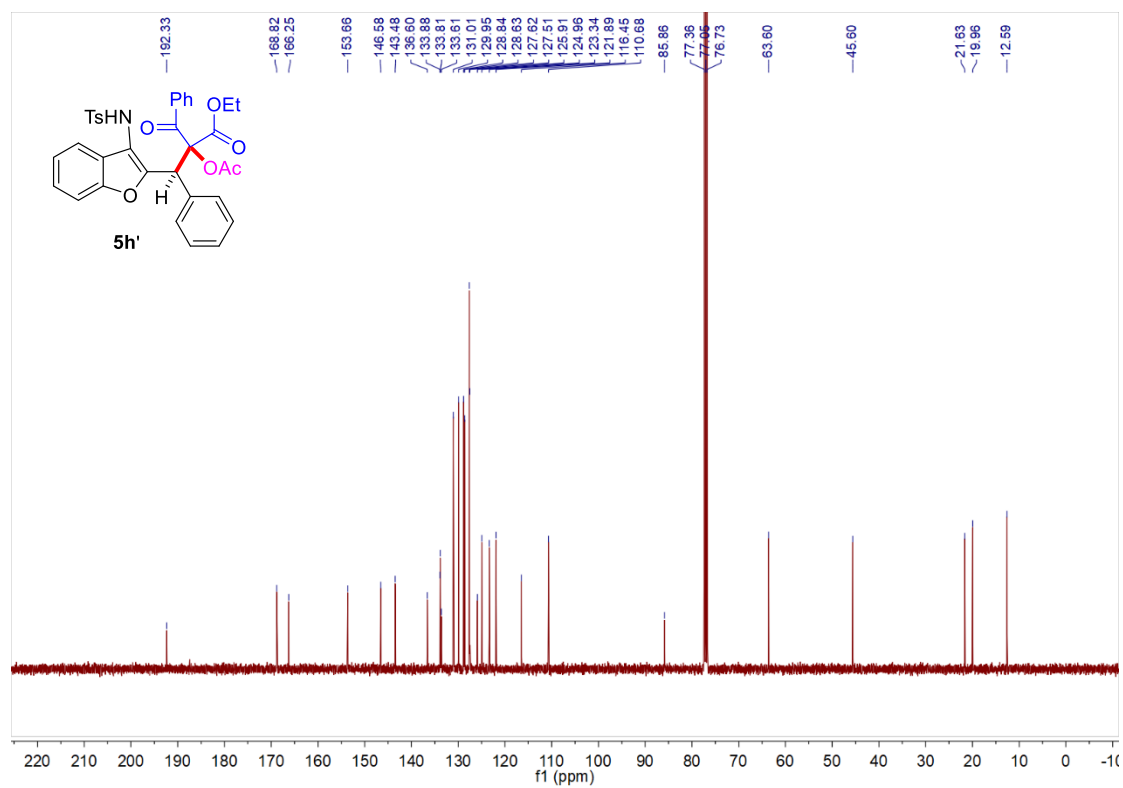

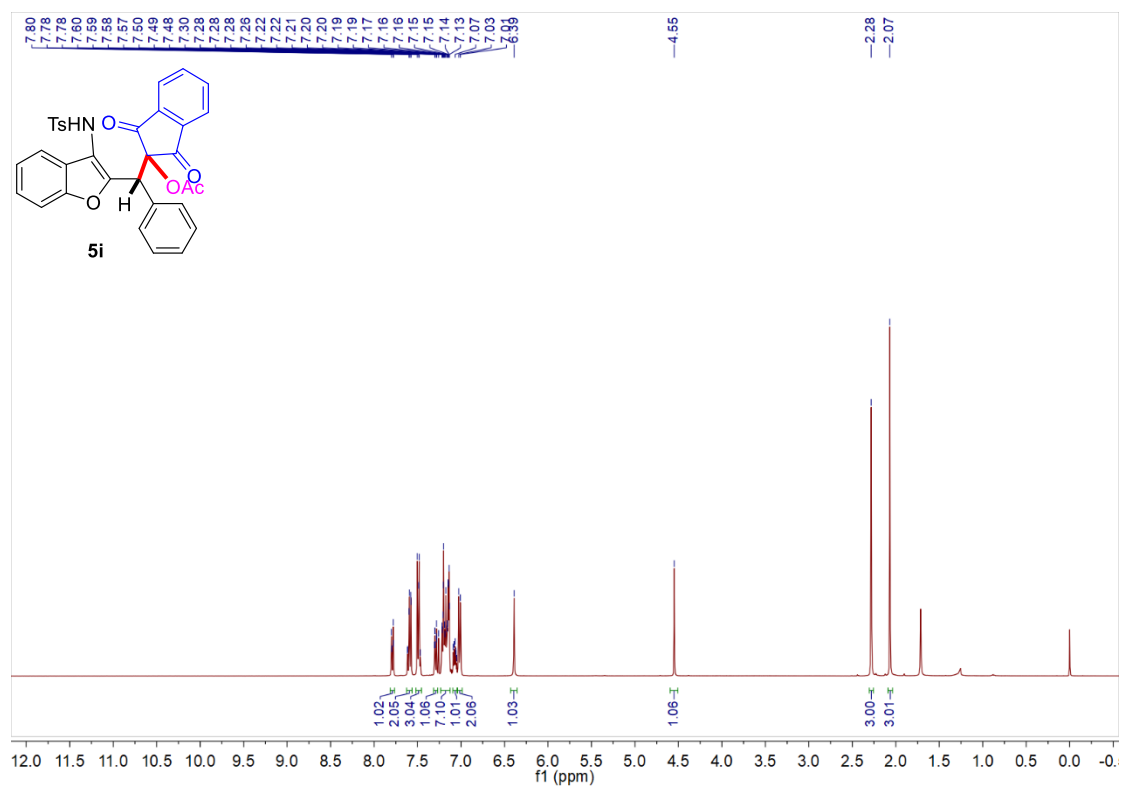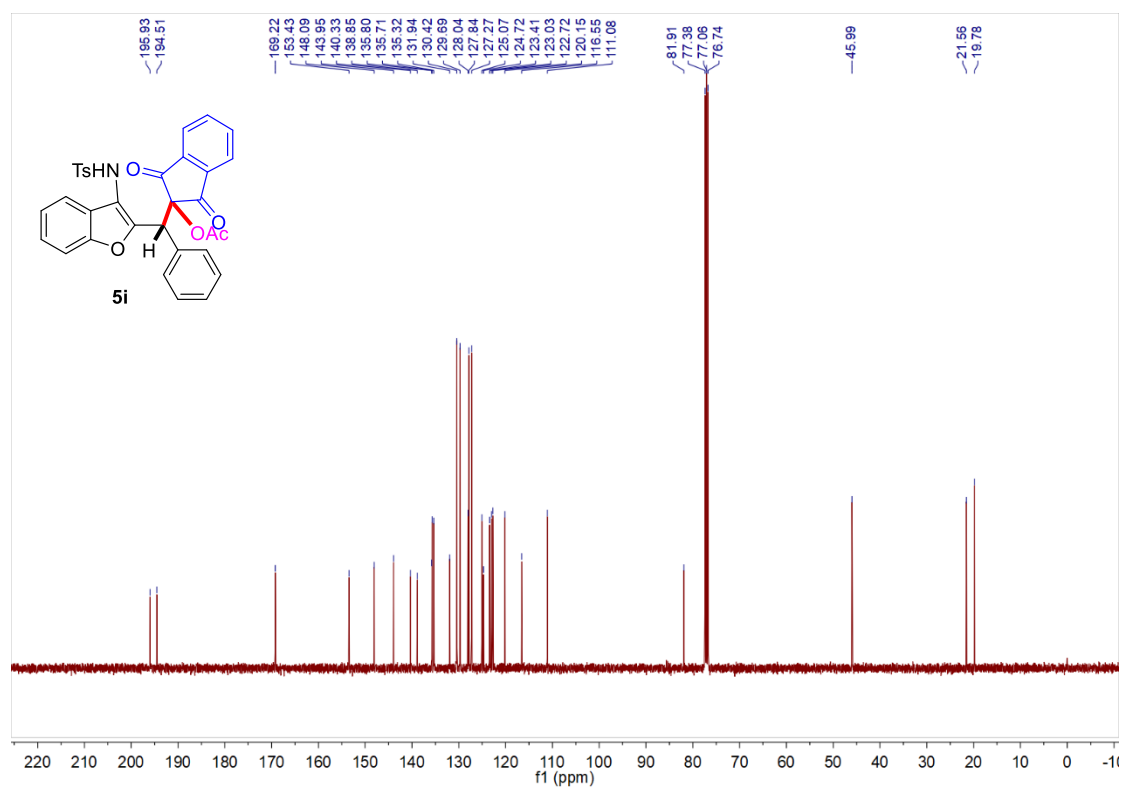

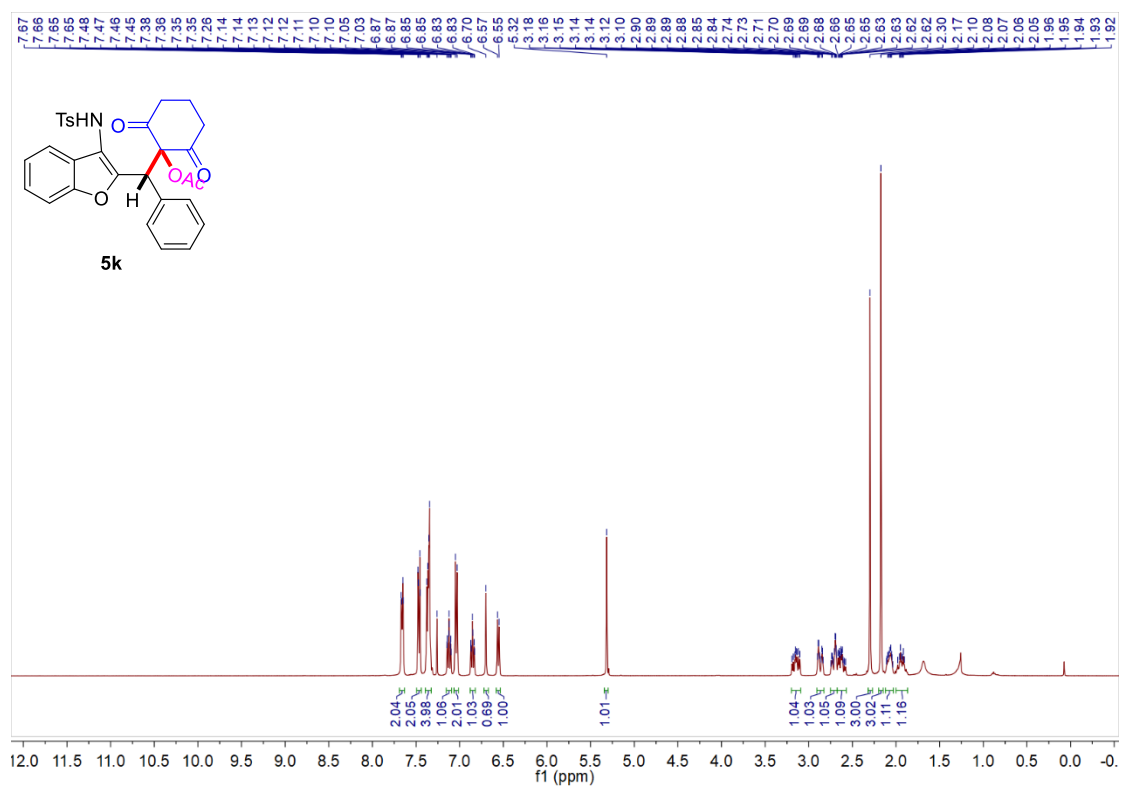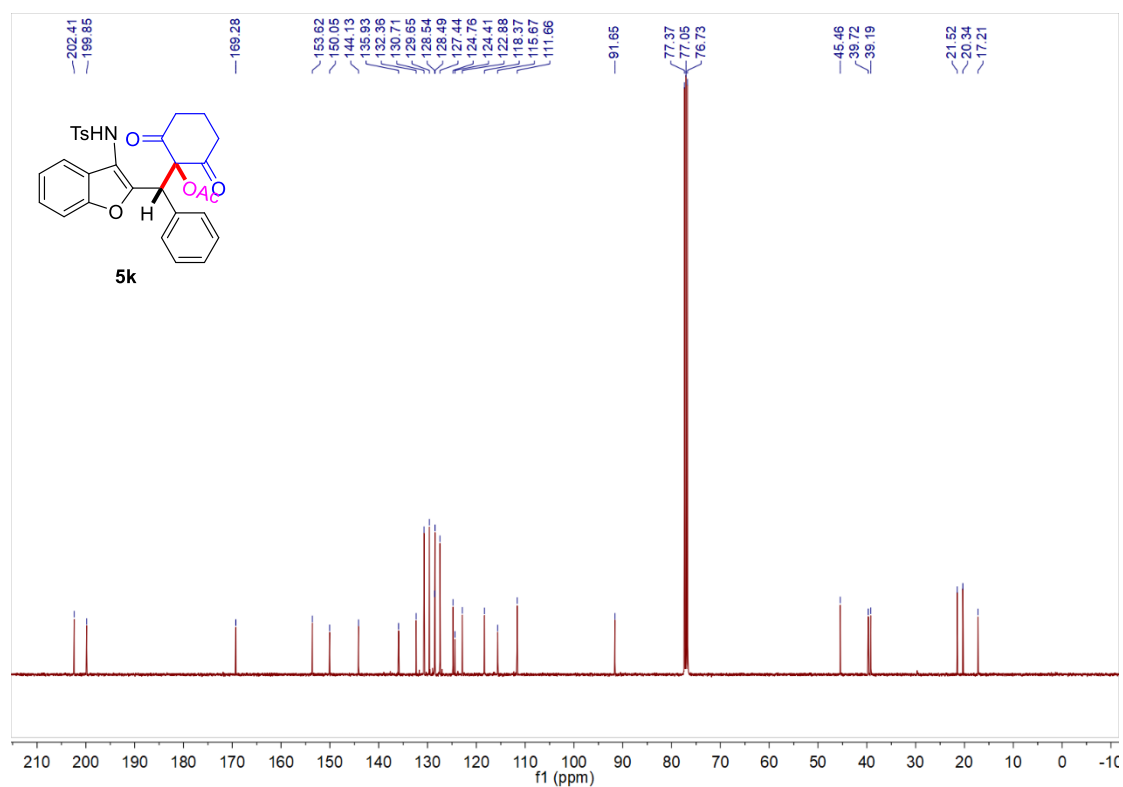

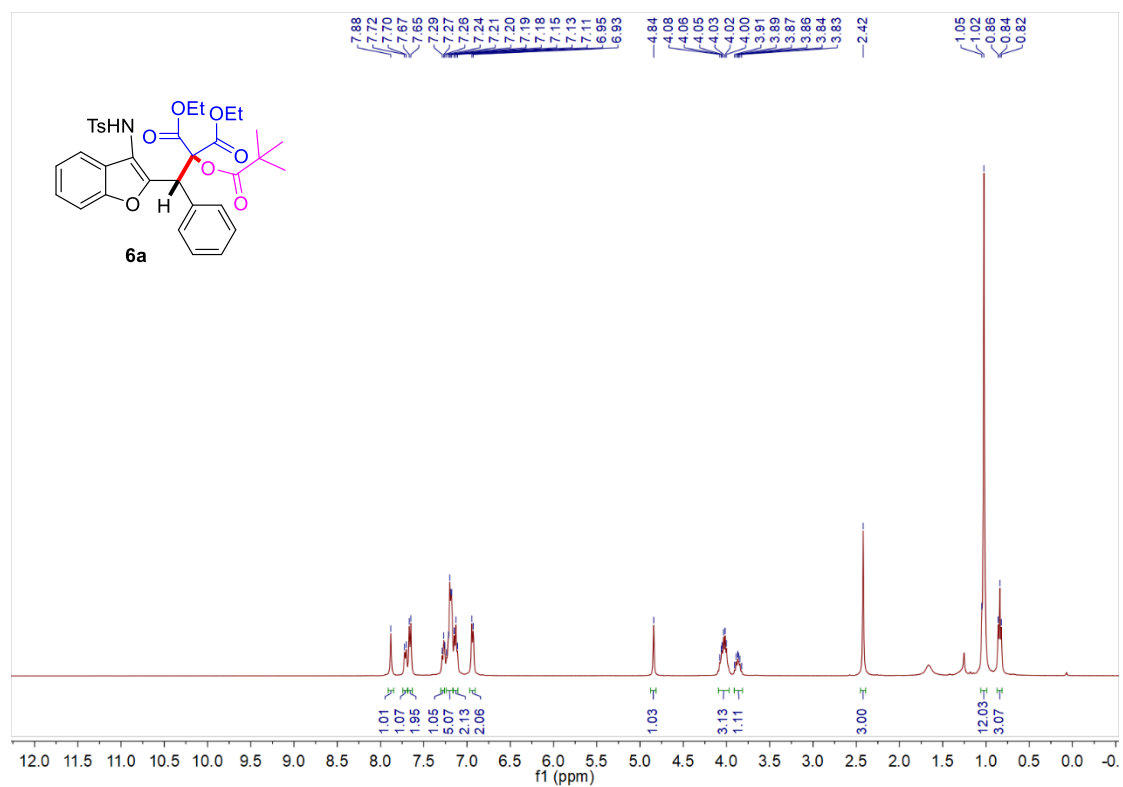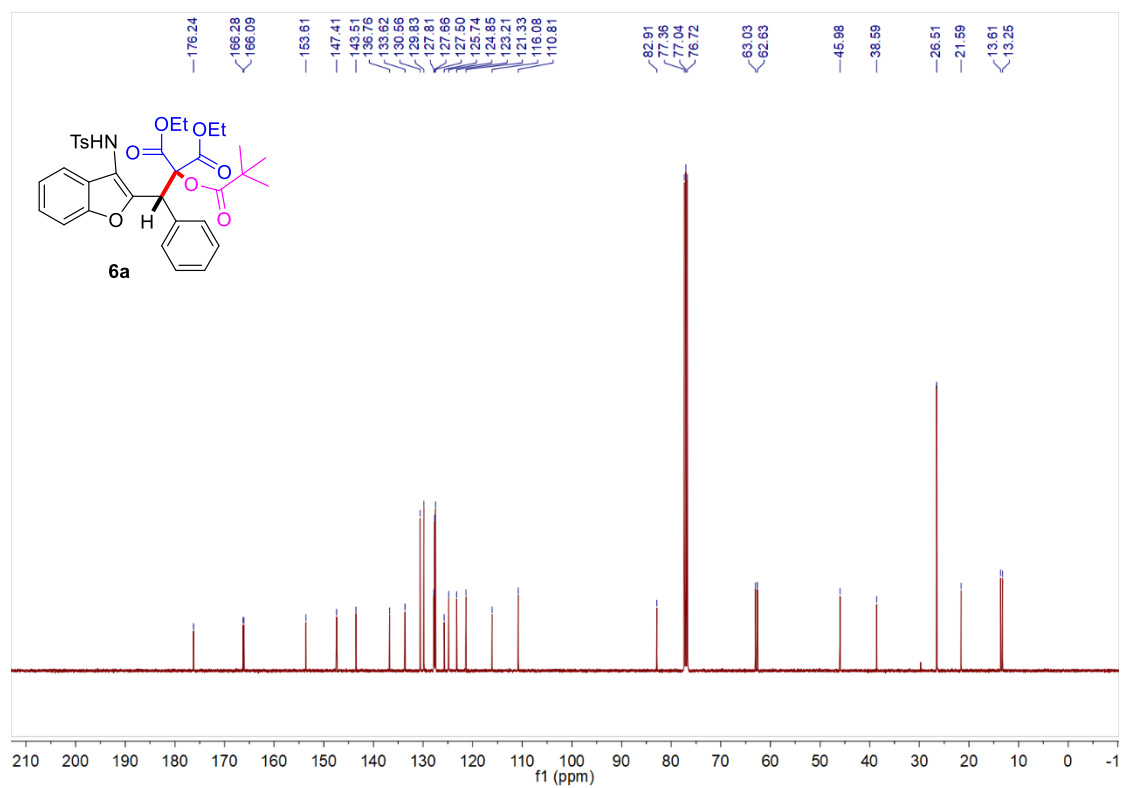

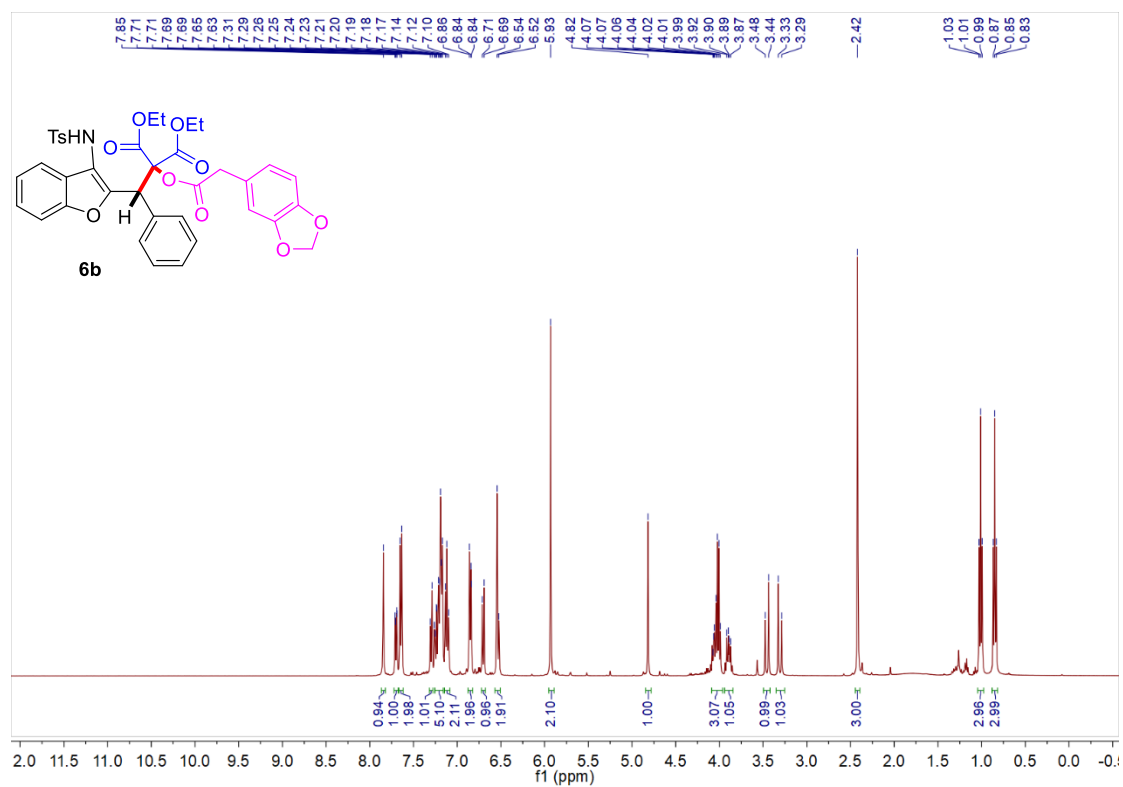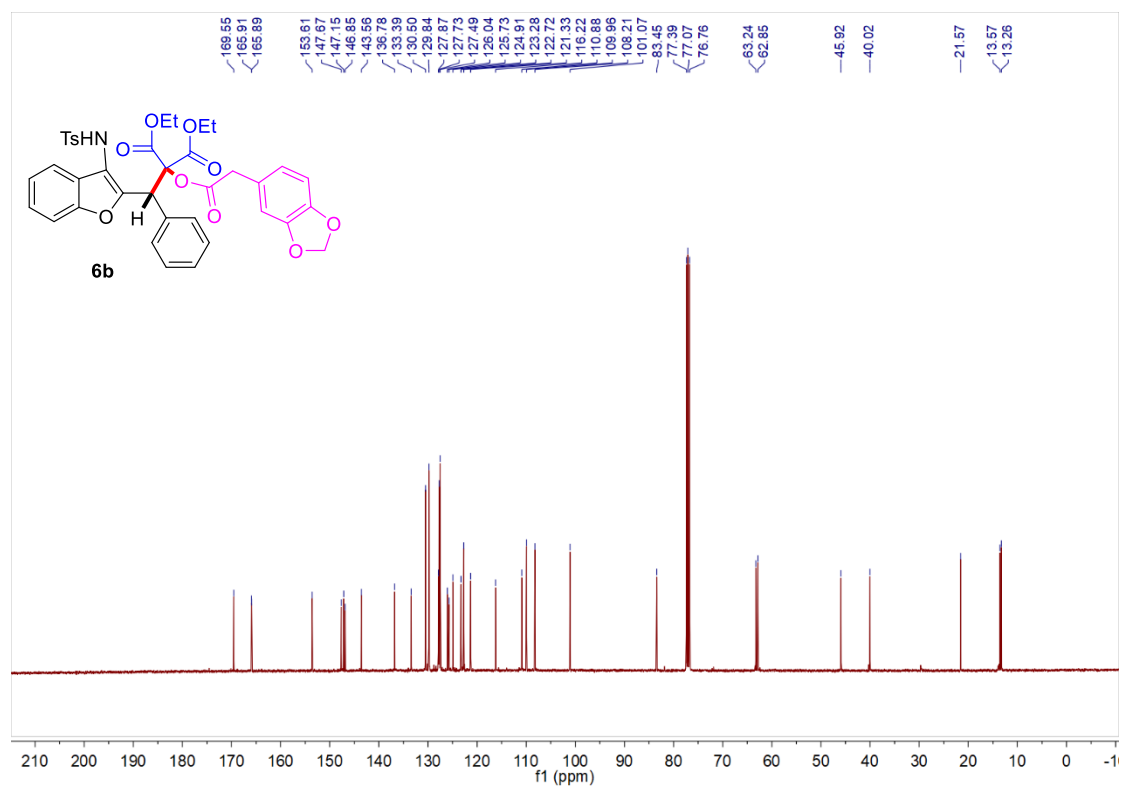

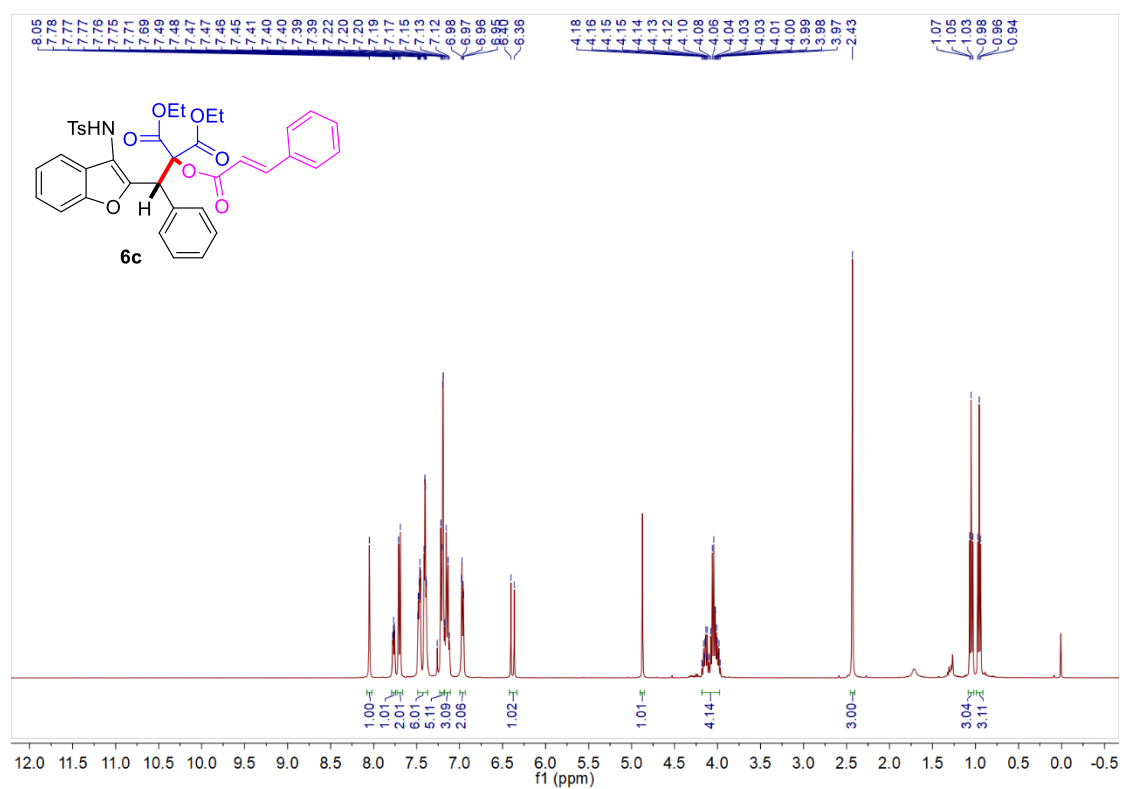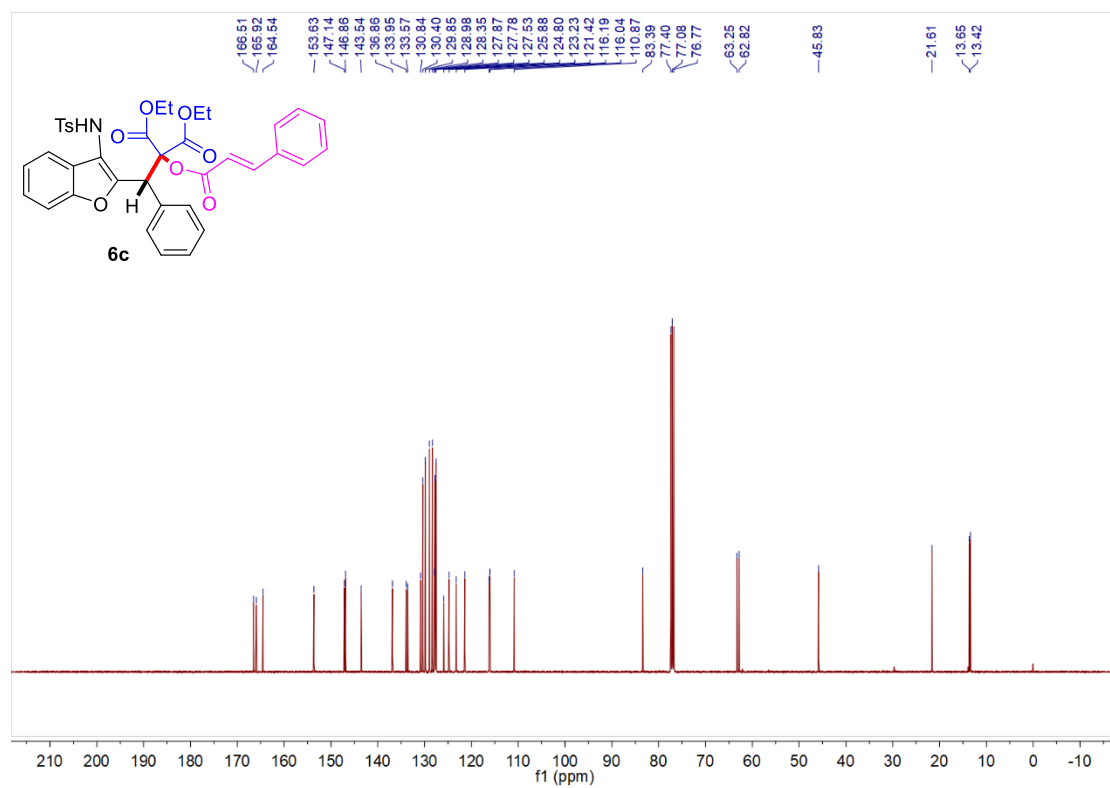

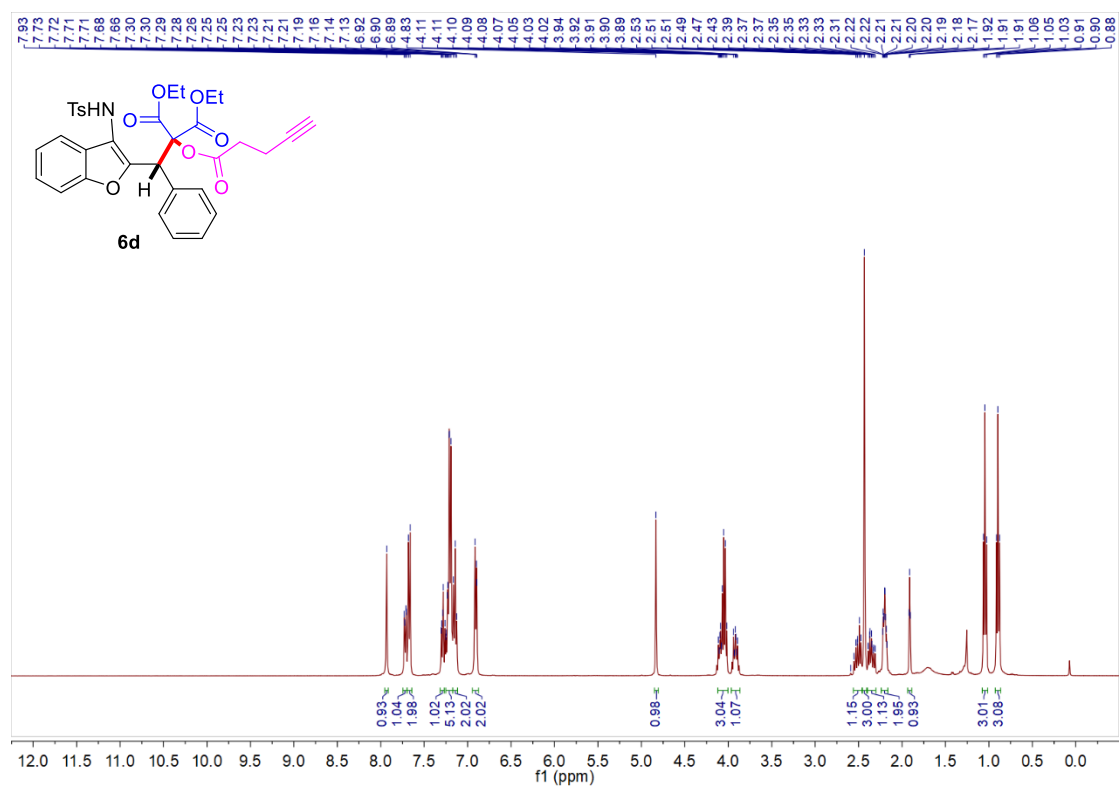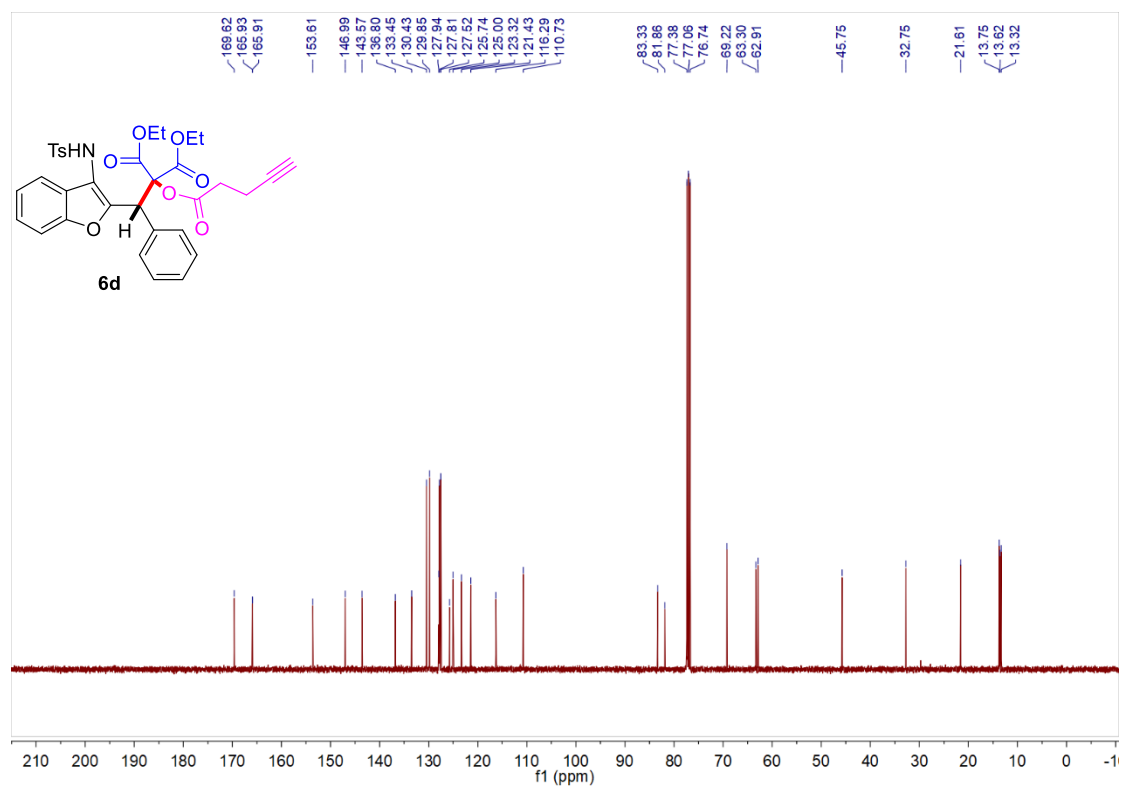



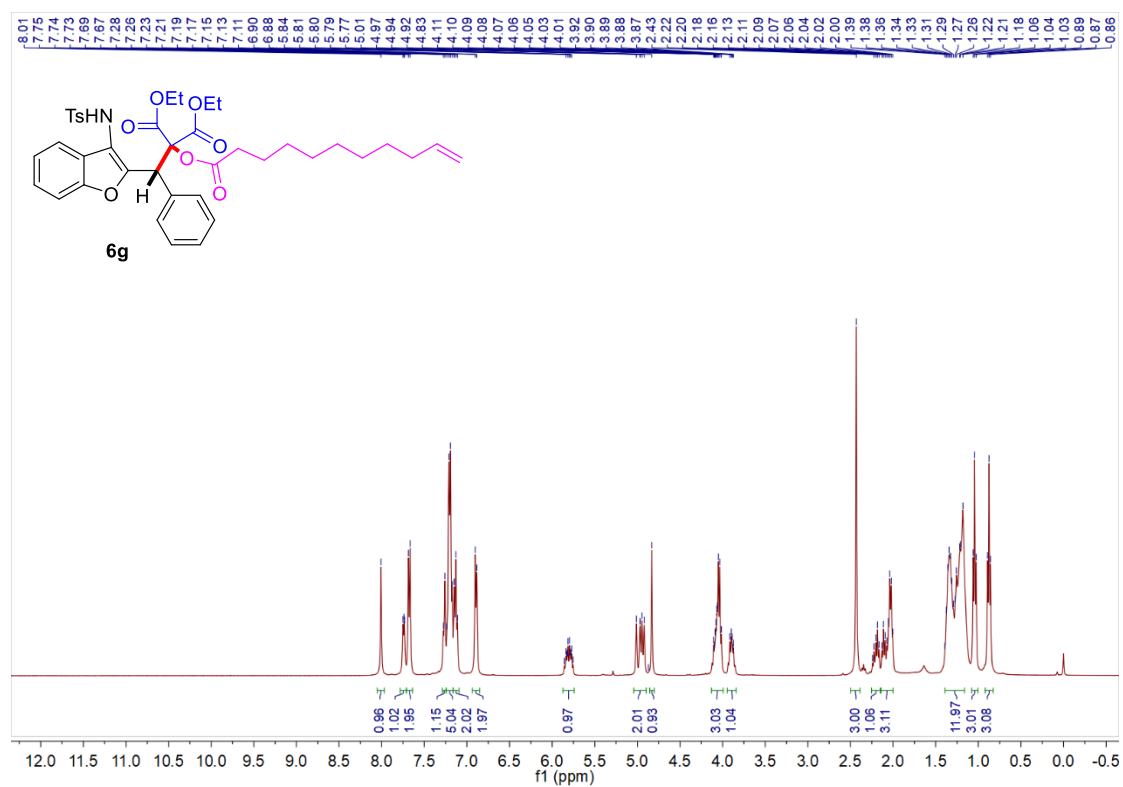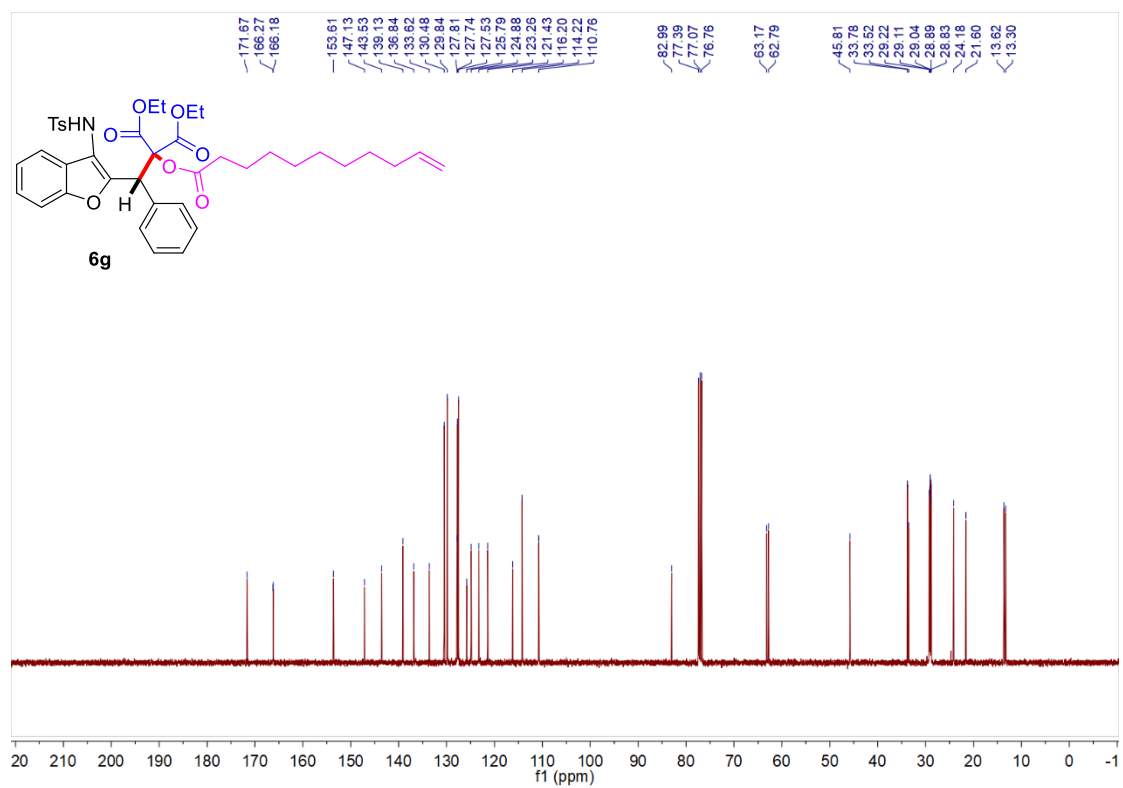

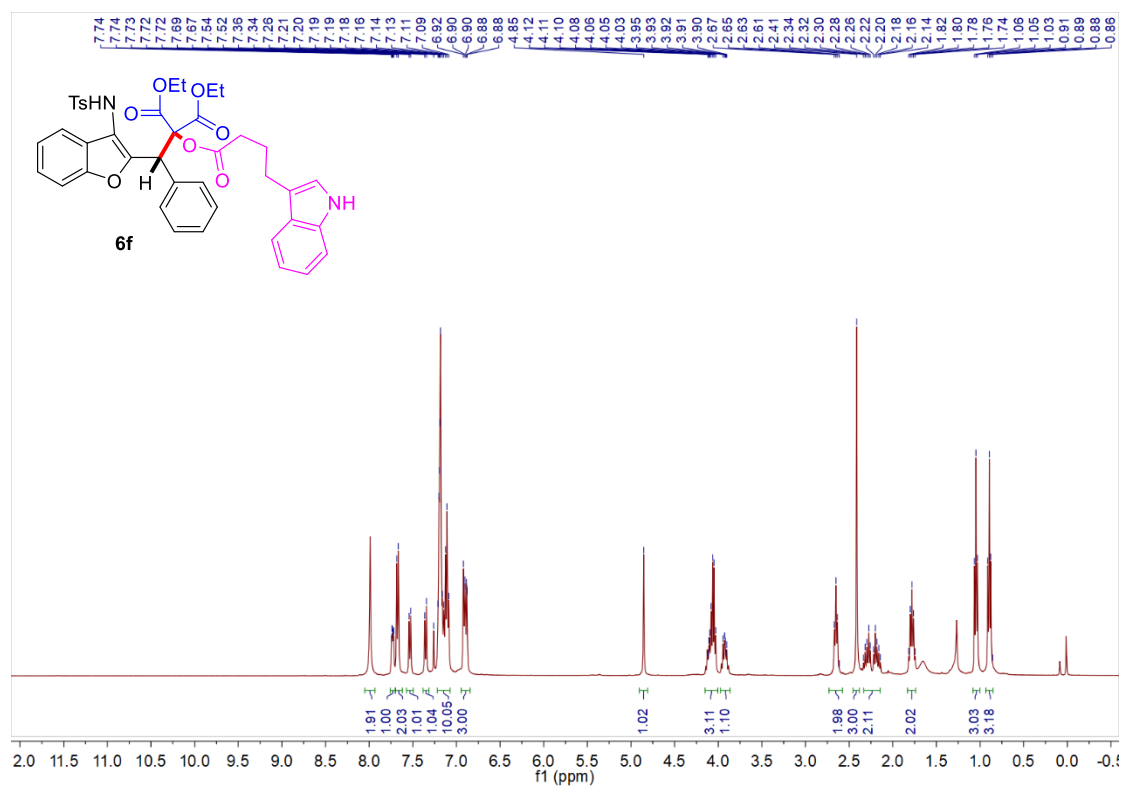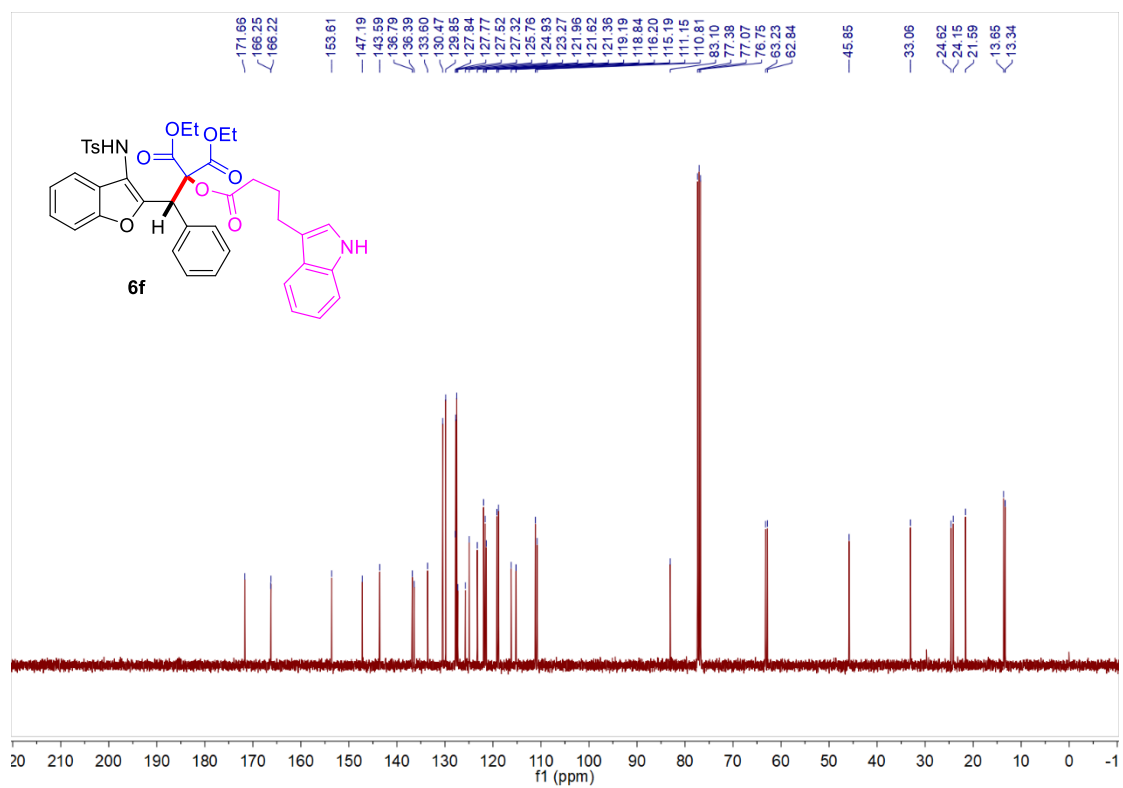

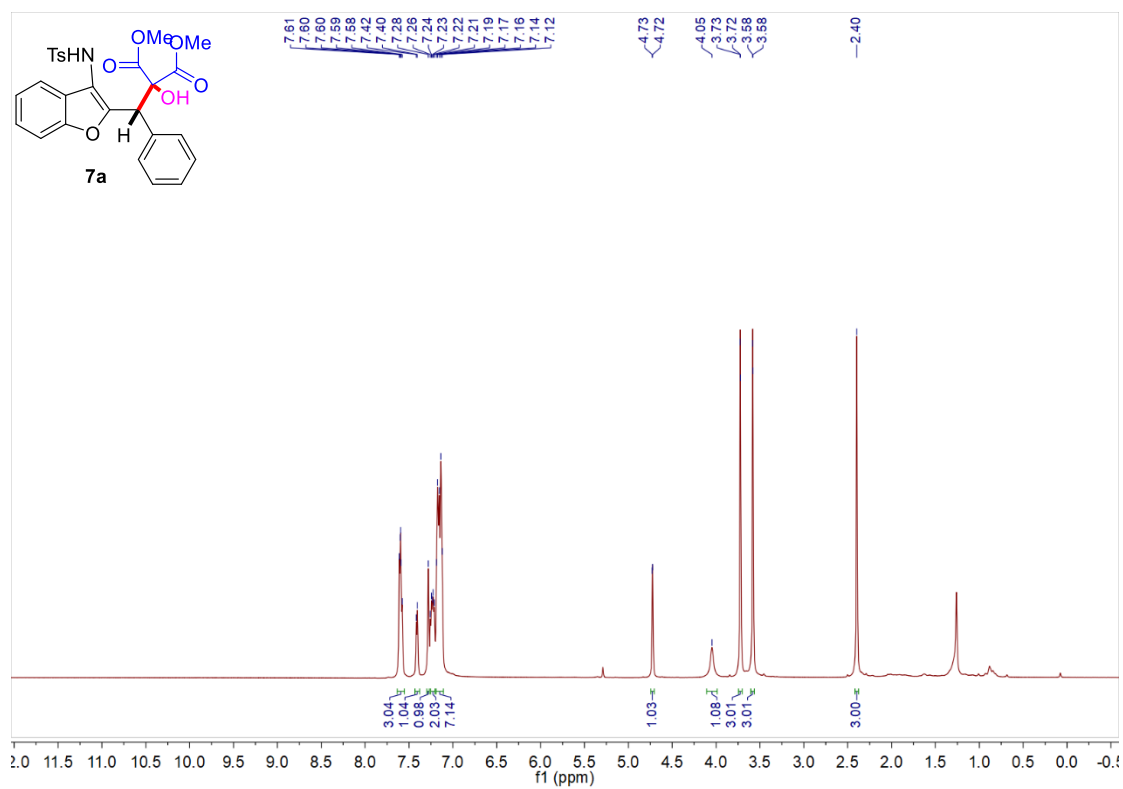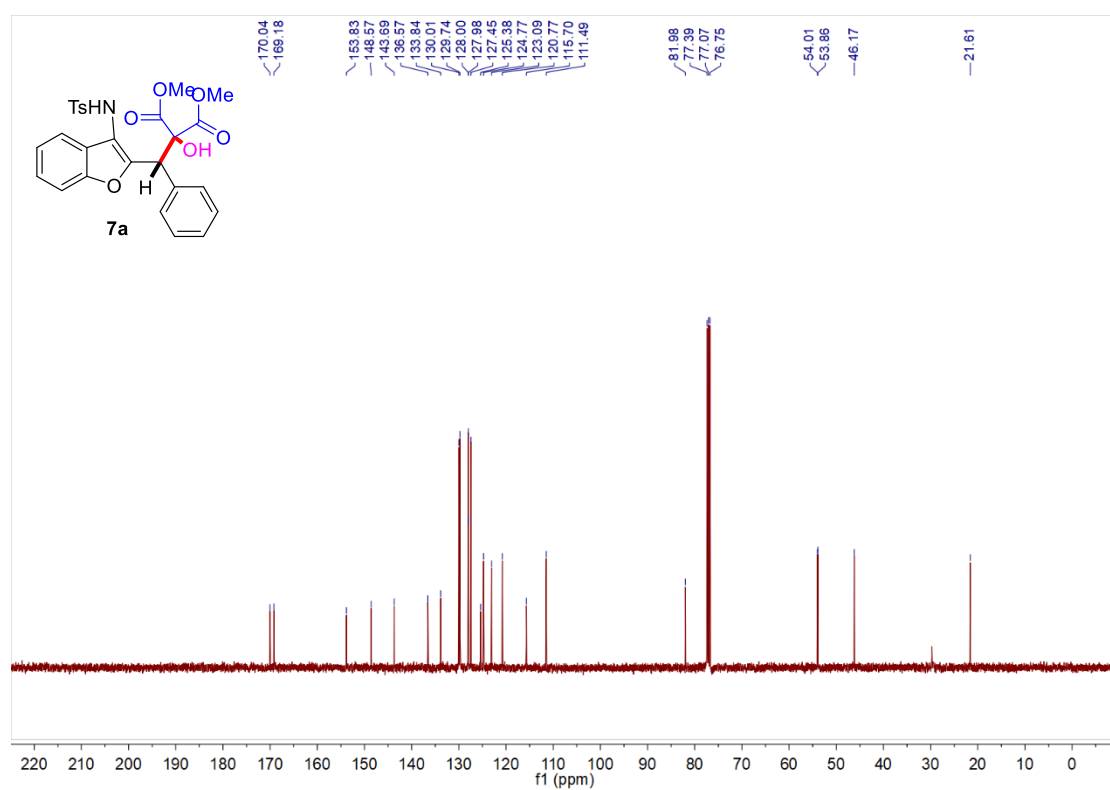

Supplement: d2ob02133a1.pdf [file d2ob02133a1.pdf]
